# Supplementary material for: Risk factors associated with the coexistence of stunting, underweight, and wasting in children under 5 from 31 sub-Saharan African countries
Source: PubMed Central journal article supplement — BMJ Open. 2021 Dec 20;11(12):e052267. doi: 10.1136/bmjopen-2021-052267 (PMC8689177; doi:10.1136/bmjopen-2021-052267), 2021-12-20
Supplement: bmjopen-2021-052267.draft_revisions.pdf [file bmjopen-2021-052267.draft_revisions.pdf]

# BMJ Open

BMJ Open is committed to open peer review. As part of this commitment we make the peer review history of every article we publish publicly available.

When an article is published we post the peer reviewers' comments and the authors' responses online. We also post the versions of the paper that were used during peer review. These are the versions that the peer review comments apply to.

The versions of the paper that follow are the versions that were submitted during the peer review process. They are not the versions of record or the final published versions. They should not be cited or distributed as the published version of this manuscript.

BMJ Open is an open access journal and the full, final, typeset and author-corrected version of record of the manuscript is available on our site with no access controls, subscription charges or pay-per-view fees (<http://bmjopen.bmj.com>).

If you have any questions on BMJ Open's open peer review process please email [info.bmjopen@bmj.com](mailto:info.bmjopen@bmj.com)

# BMJ Open

## Socio-demographic and environmental risk factors accounting for the co-existence of wasting, stunting, and underweight in children under five: Analysis of cross-sectional surveys from 31 sub-Saharan African countries

|                               |                                                                                                                                                                                                                                                                                                                                                                                                                                                                                                                                                                                                                                                                                                                                                                                                                                                                                                                                                                                                                                                                                                                                                                                                                                                                                                                                                                                                                                                                                                                                                                                                                                                                                                                                                                                                                                              |
|-------------------------------|----------------------------------------------------------------------------------------------------------------------------------------------------------------------------------------------------------------------------------------------------------------------------------------------------------------------------------------------------------------------------------------------------------------------------------------------------------------------------------------------------------------------------------------------------------------------------------------------------------------------------------------------------------------------------------------------------------------------------------------------------------------------------------------------------------------------------------------------------------------------------------------------------------------------------------------------------------------------------------------------------------------------------------------------------------------------------------------------------------------------------------------------------------------------------------------------------------------------------------------------------------------------------------------------------------------------------------------------------------------------------------------------------------------------------------------------------------------------------------------------------------------------------------------------------------------------------------------------------------------------------------------------------------------------------------------------------------------------------------------------------------------------------------------------------------------------------------------------|
| Journal:                      | <i>BMJ Open</i>                                                                                                                                                                                                                                                                                                                                                                                                                                                                                                                                                                                                                                                                                                                                                                                                                                                                                                                                                                                                                                                                                                                                                                                                                                                                                                                                                                                                                                                                                                                                                                                                                                                                                                                                                                                                                              |
| Manuscript ID                 | bmjopen-2021-052267                                                                                                                                                                                                                                                                                                                                                                                                                                                                                                                                                                                                                                                                                                                                                                                                                                                                                                                                                                                                                                                                                                                                                                                                                                                                                                                                                                                                                                                                                                                                                                                                                                                                                                                                                                                                                          |
| Article Type:                 | Original research                                                                                                                                                                                                                                                                                                                                                                                                                                                                                                                                                                                                                                                                                                                                                                                                                                                                                                                                                                                                                                                                                                                                                                                                                                                                                                                                                                                                                                                                                                                                                                                                                                                                                                                                                                                                                            |
| Date Submitted by the Author: | 20-Apr-2021                                                                                                                                                                                                                                                                                                                                                                                                                                                                                                                                                                                                                                                                                                                                                                                                                                                                                                                                                                                                                                                                                                                                                                                                                                                                                                                                                                                                                                                                                                                                                                                                                                                                                                                                                                                                                                  |
| Complete List of Authors:     | <p>Amadu, Iddrisu; University of Cape Coast, Africa Centre of Excellence in Coastal Resilience, University of Cape Coast, Cape Coast, Ghana;<br/> University of Cape Coast, Department of Fisheries and Aquatic Sciences, School of Biological Sciences, College of Agriculture and Natural Sciences, University of Cape Coast, Ghana</p> <p>Seidu, Abdul-Aziz; University of Cape Coast, Department of Population and Health; James Cook University, College of Public Health, Medical and Veterinary Sciences, James Cook University, Townsville, Queensland, Australia</p> <p>Duku, Eric; University of Cape Coast, Africa Centre of Excellence in Coastal Resilience, University of Cape Coast, Cape Coast, Ghana;<br/> University of Cape Coast, Department of Fisheries and Aquatic Sciences, School of Biological Sciences, College of Agriculture and Natural Sciences, University of Cape Coast, Ghana</p> <p>Frimpong, James Boadu; University of Cape Coast, Department of Health, Physical Education, and Recreation, University of Cape Coast, Cape Coast, Ghana</p> <p>Hagan Jnr., John; University of Cape Coast, Department of Health, Physical Education, and Recreation, University of Cape Coast, Cape Coast, Ghana</p> <p>Aboagye, Richard ; University of Health and Allied Sciences, School of Public Health, University of Health and Allied Sciences, Ho, Ghana</p> <p>Ampah, Belinda; Nursing and Midwifery Training College, Department of Academics, Nursing and Midwifery Training College, P.O.Box, 7, Esiama, Ghana</p> <p>Adu, Collins; Kwame Nkrumah University of Science and Technology, Department of Health Promotion and Disability Studies</p> <p>Ahinkorah, Bright; University of Technology Sydney, School of Public Health, Faculty of Health, University of Technology Sydney, NSW, Australia.</p> |
| Keywords:                     | Public health < INFECTIOUS DISEASES, Epidemiology < TROPICAL MEDICINE, Child protection < PAEDIATRICS                                                                                                                                                                                                                                                                                                                                                                                                                                                                                                                                                                                                                                                                                                                                                                                                                                                                                                                                                                                                                                                                                                                                                                                                                                                                                                                                                                                                                                                                                                                                                                                                                                                                                                                                        |
|                               |                                                                                                                                                                                                                                                                                                                                                                                                                                                                                                                                                                                                                                                                                                                                                                                                                                                                                                                                                                                                                                                                                                                                                                                                                                                                                                                                                                                                                                                                                                                                                                                                                                                                                                                                                                                                                                              |

1  
2  
3  
4  
5  
6  
7  
8  
9  
10  
11  
12  
13  
14  
15  
16  
17  
18  
19  
20  
21  
22  
23  
24  
25  
26  
27  
28  
29  
30  
31  
32  
33  
34  
35  
36  
37  
38  
39  
40  
41  
42  
43  
44  
45  
46  
47  
48  
49  
50  
51  
52  
53  
54  
55  
56  
57  
58  
59  
60

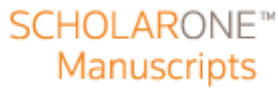

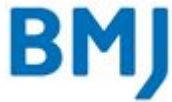

I, the Submitting Author has the right to grant and does grant on behalf of all authors of the Work (as defined in the below author licence), an exclusive licence and/or a non-exclusive licence for contributions from authors who are: i) UK Crown employees; ii) where BMJ has agreed a CC-BY licence shall apply, and/or iii) in accordance with the terms applicable for US Federal Government officers or employees acting as part of their official duties; on a worldwide, perpetual, irrevocable, royalty-free basis to BMJ Publishing Group Ltd ("BMJ") its licensees and where the relevant Journal is co-owned by BMJ to the co-owners of the Journal, to publish the Work in this journal and any other BMJ products and to exploit all rights, as set out in our [licence](#).

The Submitting Author accepts and understands that any supply made under these terms is made by BMJ to the Submitting Author unless you are acting as an employee on behalf of your employer or a postgraduate student of an affiliated institution which is paying any applicable article publishing charge ("APC") for Open Access articles. Where the Submitting Author wishes to make the Work available on an Open Access basis (and intends to pay the relevant APC), the terms of reuse of such Open Access shall be governed by a Creative Commons licence – details of these licences and which [Creative Commons](#) licence will apply to this Work are set out in our licence referred to above.

Other than as permitted in any relevant BMJ Author's Self Archiving Policies, I confirm this Work has not been accepted for publication elsewhere, is not being considered for publication elsewhere and does not duplicate material already published. I confirm all authors consent to publication of this Work and authorise the granting of this licence.

1  
2  
3 1 **Socio-demographic and environmental risk factors accounting for the co-existence of**  
4 **wasting, stunting, and underweight in children under five: Analysis of cross-sectional**  
5 **surveys from 31 sub-Saharan African countries**  
6

7  
8 4 Iddrisu Amadu<sup>1,2</sup>, Abdul-Aziz Seidu<sup>3,4</sup>, Eric Duku<sup>1,2</sup>, James Boadu Frimpong<sup>5</sup>, John Elvis  
9 Hagan Jr<sup>5,6</sup>, Richard Gyan Aboagye<sup>7</sup>, Belinda Ampah<sup>8</sup>, Collins Adu<sup>9</sup>, Bright Opoku  
10 Ahinkorah<sup>10</sup>  
11

12 8 <sup>1</sup>Africa Centre of Excellence in Coastal Resilience, University of Cape Coast, Cape Coast,  
13 Ghana  
14

15 10 <sup>2</sup>Department of Fisheries and Aquatic Sciences, School of Biological Sciences, College of  
16 Agriculture and Natural Sciences, University of Cape Coast, Ghana  
17

18 12 <sup>3</sup>Department of Population and Health, College of Humanities and Legal Studies,  
19 University of Cape Coast, Ghana.  
20

21 14 <sup>4</sup>College of Public Health, Medical and Veterinary Sciences, James Cook University,  
22 Townsville, Queensland, Australia  
23

24 16 <sup>5</sup>Department of Health, Physical Education, and Recreation, University of Cape Coast, Cape  
25 Coast, Ghana  
26

27 18 <sup>6</sup>Neurocognition and Action-Biomechanics-Research Group, Faculty of Psychology and  
28 Sport Sciences, Bielefeld University, Bielefeld-Germany  
29

30 20 <sup>7</sup>School of Public Health, University of Health and Allied Sciences, Ho, Ghana  
31

32 21 <sup>8</sup>Department of Academics, Nursing and Midwifery Training College, P.O.Box, 7, Esiama,  
33 Ghana  
34

35 23 <sup>9</sup>Department of Health Promotion, Education and Disability Studies, Kwame Nkrumah  
36 University of Science and Technology, Kumasi, Ghana  
37

38 25 <sup>10</sup>School of Public Health, Faculty of Health, University of Technology Sydney, NSW,  
39 Australia.  
40

41 28 **\*Corresponding author**  
42

43 30 **Email addresses**  
44

45 31 IA: iddrisu.amadu@stu.ucc.edu.gh  
46

47 32 \*AS: abdul-aziz.seidu@stu.ucc.edu.gh  
48

49 33 ED: eric.duku@stu.ucc.edu.gh  
50

51 34 JBF: frimpongboadujames@gmail.com  
52

53 35 JEH: elvis.hagan@ucc.edu.gh  
54

55 36 RGA: raboagye18@sph.uhas.edu.gh  
56

57 37 BA: [oyebel@gmail.com](mailto:oyebel@gmail.com)  
58

59 38 CA: collinsadu80@yahoo.com  
60

61 39 BOA: brightahinkorah@gmail.com  
62  
63  
64

1  
2  
3 45 **ABSTRACT**  
4

5 46 **Objective:** This study investigated the socio-demographic and environmental risk factors  
6 47 of the co-existence of wasting, stunting, and underweight among children under age five  
7 48 in sub-Saharan Africa.

9 49 **Methods:** Data from 31 sub-Saharan African countries were pooled from the Demographic  
10 50 and Health Surveys (DHS) collected between 2010 and 2019. We examined the risk of co-  
11 51 existence of malnutrition using multinomial logistic regression models, with results  
12 52 presented as relative risk ratios (RRR) with their respective confidence intervals.

13 53 **Outcome measures:** The outcome variables were three child anthropometrics: stunting  
14 54 (height-for-age z-scores); wasting (weight-for-height z-scores); and underweight (weight-  
15 55 for-age z-scores).

16 56 **Results:** The prevalence of co-existence of stunting, wasting and underweight varied  
17 57 across countries and sub-regions, with the highest and lowest prevalence of co-existence  
18 58 of stunting, wasting, and underweight as Benin (12.14%) and Gambia (0.58%) respectively.  
19 59 The risk of co-existence of the three malnutrition dimensions was higher among children  
20 60 age 1 year compared to those aged 0. Children who were females were less likely to have  
21 61 a co-existence of the three dimensions of malnutrition compared to their male  
22 62 counterparts. The risk of co-existence of the three dimensions was higher among children  
23 63 with small size at birth, those whose mothers had no education, not working, had no  
24 64 antenatal visits during pregnancy, children delivered at home, those whose mothers were  
25 65 poor, had no access to media, and children whose mothers had unimproved toilet facility.

26 66 **Conclusion:** Findings suggest context nutrition-specific interventions such as  
27 67 complimentary feeding, dietary supplementation and increasing dietary diversity to  
28 68 promote children feeding practices in the studied countries are warranted. Planned  
29 69 interventions should prioritize all the identified factors noted in the current study to help  
30 70 reduce the risks of co-existence of stunting, wasting, and underweight among children  
31 71 under age 5.

32 72 **Keywords:** co-existence; wasting; stunting; underweight; children under five; sub-Saharan  
33 73 Africa  
34  
35  
36  
37  
38  
39  
40  
41  
42  
43  
44  
45  
46  
47  
48  
49  
50  
51  
52  
53  
54  
55  
56  
57  
58  
59  
60

74

**Strength and Limitations**

- The use of nationally representative data ensures that our findings are generalizable and replicable in the 31 SSA countries included in this study.
- Findings contribute to bridging the gaps identified in the current research on CNS by including multiple indicators (stunting, wasting, and underweight) in the concurrent measurement of our outcome variable, compared to the unitary assessment on malnutrition that currently dominates literature.
- The study relied on secondary data, the analysis was limited to only variables that were in the dataset. Hence, interpretations and inferences made from current findings must be limited to only these observed variables.
- Also, the DHS employs cross-sectional designs which restrict causality on the noted outcomes.
- The key variables were self-reported by the mothers, and therefore, there is the likelihood of recall bias and other social desirability concerns in the present study.

75

76

77

78

79

80

81

## 82 BACKGROUND

83 Malnutrition among children under 5 years remains a major public health problem across  
84 many developing countries<sup>1-3</sup>. Factors such as insufficient food intake, diarrhoea, recurring  
85 infections, poor sanitation practices, and low parental education have been identified as  
86 significant contributors to the high prevalence of malnutrition during childhood<sup>1,4,5</sup>.  
87 Despite the numerous interventions rolled out to address childhood malnutrition  
88 especially in sub-Saharan Africa where the phenomenon is quite pervasive, the progress  
89 seems to be insignificant<sup>6,7</sup>. For example, a study reported that child malnutrition  
90 accounted for nearly half (45%) of child mortality rate in developing countries<sup>8</sup>. Aside from  
91 that, it was reported in 2018 that about 149 million and 49 million children under age 5 were  
92 stunted and wasted respectively<sup>9</sup>.

93 Three main indicators that are often used to represent malnutrition are underweight or  
94 low weight for age, stunting or low height for age, and wasting or low weight for height<sup>2,10-</sup>  
95 <sup>12</sup>. Among the three indicators of malnutrition, stunting has been identified as the problem  
96 with the greatest magnitude among under 5 children in developing countries<sup>2,3</sup>. Even  
97 though the prevalence of stunting in sub-Saharan Africa is declining, it is worth noting that  
98 it is still above 30%<sup>13</sup> which is undeniably high. Research also indicates that the country-  
99 specific prevalence of wasting, underweight, and stunting is still high<sup>2,3</sup>. For instance, in  
100 Ethiopia, the prevalence of wasting and stunting were 10% and 38% respectively<sup>14</sup>.  
101 Additionally, the prevalence of stunting, underweight and wasting among children in  
102 South Africa were 35.8%, 20.5%, and 17.2%<sup>3</sup>. Likewise, Anin et al.<sup>2</sup> reported 33.2%, 14.1%, 27%  
103 and 2.6% of prevalence in stunting, wasting, underweight and overweight among infants  
104 (6-23 months) across Northern Ghana.

105 Previous studies have investigated the socio-demographic and environmental risk factors  
106 associated with wasting, stunting and underweight among children under 5 years and  
107 found the age of a child, sex of the child, child's size at birth, mother's age during  
108 childbirth, mother's educational level, birth order, place of residence and mother's body  
109 mass index (BMI) as associated factors<sup>1-3,15,16</sup>. Other studies also found significant linkage  
110 between household wealth quintile and maternal short stature, and nutritional status of  
111 children under 5<sup>17,18</sup>. Regarding the sex of child, for example, female children were found  
112 to be less likely to suffer from stunting compared to males<sup>1,3</sup>.

113 Despite the detrimental consequences of malnutrition on the health and wellbeing of  
114 children under 5, it appears few studies have utilised current nationally representative data  
115 from a larger sample to investigate the socio-demographic and environmental risk factors  
116 associated with stunting, underweight and wasting among this age group, making it  
117 difficult for policymakers and nutritional experts to provide up-to-date trends with  
118 appropriate strategies to curb the situation in the sub-region. This research lag presents a  
119 void in extant literature which this study seeks to bridge.

120 Therefore, the study investigated the socio-demographic and environmental risk factors  
121 of the co-existence of wasting, stunting, and underweight among children under age 5 in  
122 sub-Saharan Africa using data from the Demographic Health Survey (DHS) conducted in 31  
123 countries between 2010 and 2019. The findings of the study could contribute to the  
124 formulation of policies and interventions to respond to the nutritional needs of children



1  
2  
3 125 under 5 years and also suggest pragmatic ways of reducing malnutrition among children  
4 126 in the sub-region.

6 127 Malnutrition is one of the pervasive and leading causes of death, especially among  
7 128 children. Globally, more than half of child mortality is attributed to malnutrition<sup>19</sup>. In  
8 129 developing countries, especially, in Africa, the prevalence of nutritional insecurity among  
9 130 children is staggering. According to studies<sup>20,21</sup>, SSA accounts for a disproportionate  
10 131 number of children suffering from malnutrition in the world. The situation is more alarming  
11 132 as the co-existence of stunting, wasting and underweight and other diet-related (double  
12 133 burden) is increasingly becoming prevalent<sup>2</sup>. The World Health Organization (WHO)  
13 134 report<sup>22</sup> indicates that aggressive actions are needed to address the double burden of  
14 135 malnutrition to achieve the 6 global nutrition targets by 2025. This call underscores the  
15 136 need for more research that provides useful insights that could inform policy actions and  
16 137 intervention programming. Studies have examined the independent prevalence of  
17 138 stunting, wasting, and underweight and the risk factors associated with each of them  
18 139 among children under the age of 5 years in sub-Saharan African countries<sup>21</sup>. However, the  
19 140 “multiple burdens”, that is, the co-existence of the three conditions among children under  
20 141 the age of 5 years in SSA has received little attention. Here, we analyze the prevalence of  
21 142 the co-existence of stunting, wasting, and underweight among children under the age of  
22 143 5 years and the risk factors associated with it in SSA.

28 144

## 29 145 **METHODS**

### 30 146 **Data Source**

31 147 Data of 127,487 children under the age of 5 years from 31 sub-Saharan African countries  
32 148 were pooled from the most current Demographic and Health Surveys (DHS) conducted  
33 149 between 2010 and 2019 (Table 1). Specifically, the data were pooled from the children’s file  
34 150 in each of the countries. The DHS Program has conducted over 400 surveys in over 90  
35 151 developing countries around the world since 1984 every five years<sup>23</sup>. The program  
36 152 implements cross-sectional surveys to gather nationally-representative data, analyze and  
37 153 disseminate accurate information on important demographic and health indicators  
38 154 spanning population, nutrition, and diseases. For all surveys, standardized protocols  
39 155 designed for each target group including children, women, and men at the household level  
40 156 are employed to allow for cross-national comparisons. Stratified two-stage sampling  
41 157 involving first, the listing of enumeration areas and selection of clusters, and then a  
42 158 random selection of households in each cluster. The detailed sampling method can be  
43 159 found in a previous study<sup>24</sup>. The dataset is freely available for download at:  
44 160 <https://dhsprogram.com/data/available-datasets.cfm>. The Strengthening Reporting of  
45 161 Observational Studies in Epidemiology (STROBE) guidelines were followed in writing the  
46 162 manuscript<sup>25</sup>.

53 163

54 164

55 165

56 166

## 167 Study Variables

### 168 Outcome Variable

169 The outcome variable considered in this study is derived from three child anthropometric  
170 variables including stunting (height-for-age z-scores); wasting (weight-for-height z-  
171 scores); and underweight (weight-for-age z-scores). The DHS (2021) specifies  
172 categorization for each of these variables following the WHO child growth standard.  
173 Following this standard, the three variables were first coded as follows:

174 i. Stunting: children with height-for-age z-scores below minus 2 (-2.0) standard deviations  
175 (SD) less than the mean on the WHO Child Growth Standards (moderately or severely  
176 stunted) and children with height-for-age z-scores below minus 3 (-3.0) standard  
177 deviations (SD) less than the mean on the WHO Child Growth Standards (severely stunted)  
178 were combined to form the response group “Stunt” while those height-for-age z-scores  
179 higher than minus 2 (-2.0) standard deviations (SD) greater than the mean on the WHO  
180 Child Growth Standards were regarded as “normal”. These response categories were  
181 coded as 0 “Normal” and 1 “Stunt”.

182 ii. Wasting: children with weight-for-height z-scores below minus 2 (-2.0) standard  
183 deviations (SD) less than the mean on the WHO Child Growth Standards (moderately or  
184 severely wasting) and children with weight-for-height z-scores below minus 3 (-3.0)  
185 standard deviations (SD) less than the mean on the WHO Child Growth Standards (severely  
186 wasting) were combined to form the response group “Wasting” while those weight-for-  
187 height z-scores higher than minus 2 (-2.0) standard deviations (SD) greater than the mean  
188 on the WHO Child Growth Standards were regarded as “Normal”. These two response  
189 categories were coded as 0 “Normal” and 1 “Wasting”

190 iii. Underweight: children with weight-for-age z-scores below minus 2 (-2.0) standard  
191 deviations (SD) less than the mean on the WHO Child Growth Standards (moderately or  
192 severely underweight) and children with weight-for-age z-scores below minus 3 (-3.0)  
193 standard deviations (SD) less than the mean on the WHO Child Growth Standards (severely  
194 underweight) were combined to form the response group “Underweight” while those  
195 weight-for-age z-scores higher than minus 2 (-2.0) standard deviations (SD) greater than  
196 the mean on the WHO Child Growth Standards were regarded as “Normal”. These two  
197 response categories were coded as 0 “Normal” and 1 “Underweight”. For each of these  
198 variables, missing and “flagged” responses were deemed invalid and dropped.

199 These three variables were then added to generate the outcome variable “Co-existed  
200 malnutrition” with scores (discrete) ranging from 0 to 4 where 0 implies “Normal”, that is,  
201 children with none of the three conditions; 1 implies “Single burden”, that is, the child  
202 suffers from one of the three conditions; 2 indicates that child suffers from “Two burdens”  
203 out of the three; and 3 shows “Co-existed”, that is, the child suffers from all three  
204 conditions of malnutrition. For parsimony, children who suffered from “Single burden”  
205 and those who suffered from “Two burdens” were added resulting in the variable “Co-  
206 existed malnutrition” with three response categories: 0=Normal; 1=One or two burdens;  
207 and 3=co-existed.

208

209

## 210 **Independent Variables**

211 Several risk factors spanning socio-demographic and environmental have been associated  
212 with child malnutrition. The relevant biosocial characteristics and sociocultural factors  
213 related to the child, mother, household head and the household together form  
214 compositional factors<sup>26,27</sup>. Factors that describe location or “place-based” variables are  
215 contextual factors<sup>26,28,20</sup>. In this study, contextual and composition factors except  
216 household-level characteristics related to environment and sanitation are categorized as  
217 “Socio-demographic risk factors”. Socio-cultural household characteristics related to  
218 environment and sanitation are categorized as “Environmental risk factors”.

### 219 **Socio-Demographic Risk Factors**

220 The relevant variables under socio-demographic risk factors considered include the age of  
221 the child (0, 1, 2 and 4); sex of child (female and male); birth order of child (1, 2 to 4, and 5  
222 and above); perceived size at birth (small, average and large (see<sup>15</sup>); mother’s age (re-  
223 coded into two categories “15-19” years and “20-49” years); educational attainment (no  
224 formal, primary, secondary and higher); working status (yes and no); antenatal visits  
225 during pregnancy (yes and no); postnatal check within 2 months (yes and not); and place  
226 of delivery (home, health facility, other). At the household level, relevant variables  
227 included are the wealth status (recoded as “poor”, “middle” and “rich”); the age of  
228 household head (recoded as ages below 35 years “young adults”, between 35 and 55 years  
229 “middle-aged adults” and those above 55 years “Old-aged adults” (see<sup>28</sup>); sex of  
230 household head (male and female); access to electricity (yes and no); and access to media  
231 (yes, no) which was derived from the three variables “access to television”, “radio” and  
232 “newspaper”. The contextual factors considered are Urbanicity (rural and urban) and the  
233 country of origin of the participant.

### 234 **Environmental Risk Factors**

235 We considered the following variables: type of toilet facility (re-coded into “improved”  
236 and unimproved” (see<sup>28</sup>); source of drinking water (re-coded as “improved” and  
237 “unimproved” (see<sup>28</sup>); and type of household cooking fuel (re-coded into “clean” and  
238 “unclean” (see<sup>28,30</sup>) under the category “environmental risk factors”

### 239 **Data Analyses**

240 The statistical analysis of the data was performed using the Stata SE software version 14.2.  
241 The “svyset” command was first used to declare the data as survey data to prevent the  
242 potential effects of the complex sampling techniques on the analyses. To understand the  
243 distributions of the variables, the data were summarized and presented in tables using  
244 descriptive statistics (frequencies, weighted percentages, and 95% confidence intervals  
245 (CIs) of percentages). We further integrated the data into a GIS environment and  
246 presented the distribution of key variables across the study countries in map images. This  
247 approach enhances the visualization of the data and understanding of the context of the  
248 study. The associations between the co-existence of malnutrition and each of the risk  
249 factors considered were assessed using the chi-square test of independence, with results  
250 presented in a contingency table. The risk factors as independent variables were then  
251 subjected to collinearity diagnosis tests, including Variance Inflation Factors (VIF), Square  
252 VIF, Tolerance, and R-squared. To determine the socio-demographic and environmental

253 risk factors associated with the co-existence of malnutrition, a multinomial regression  
 254 model was implemented. The sample weight variable was used to adjust for potential  
 255 over-and under-sampling. All statistical tests were conducted at  $p < 0.05$ .

### 256 **Ethical Approval**

257 DHS reports ethical clearance are provided by the Ethics Committee of ORC Macro Inc. as  
 258 well as Ethics Boards of partner institutions (e.g., Ministries of Health) from studied  
 259 countries. The DHS procedures require that principles for the protection of respondents'  
 260 anonymity and confidentiality are adhered. Inner City Fund International also guarantees  
 261 that the survey protocols meet the United States Department of Health and Human  
 262 Services' regulations for the respect of human subjects. The current study used a  
 263 secondary data, hence, no further ethical approval was sought. The datasets are freely  
 264 available for download and usage at <https://dhsprogram.com/data/available-datasets.cfm>.

267 Table 1: Distribution of socio-demographic, environmental and contextual variables

| Variable (N=127,487)             | n          | %     | Variable (N=127,487)                        | n           | %     |
|----------------------------------|------------|-------|---------------------------------------------|-------------|-------|
| <b>Socio-demographic factors</b> |            |       | <b>Access to media (tv/radio/newspaper)</b> |             |       |
| Age of child                     |            |       | Yes                                         | 45,043.56   | 35.33 |
| 0                                | 39,353.73  | 30.87 | No                                          | 82,443.74   | 64.67 |
| 1                                | 36,230.39  | 28.42 | <b>Urbanicity</b>                           |             |       |
| 2                                | 25,774.66  | 20.22 | Urban                                       | 42,343.17   | 33.21 |
| 3                                | 15,811.30  | 12.4  | Rural                                       | 85,144.13   | 66.79 |
| 4                                | 10,317.23  | 8.09  | <b>Country</b>                              |             |       |
| <b>Sex of child</b>              |            |       | Angola                                      | 7,318.29    | 5.74  |
| Male                             | 64,348.16  | 50.47 | Benin                                       | 15,472.88   | 12.14 |
| Female                           | 63,139.14  | 49.53 | Burkina Faso                                | 8,907.87    | 6.99  |
| <b>Birth order</b>               |            |       | Burundi                                     | 4,171.93    | 3.27  |
| 1                                | 24,883.00  | 19.52 | Cameroon                                    | 2,910.63    | 2.28  |
| 2 to 4                           | 61,308.45  | 48.09 | Chad                                        | 5,998.88    | 4.71  |
| 5 and above                      | 41,295.86  | 32.39 | Comoros                                     | 1,319.47    | 1.03  |
| <b>Perceived size at birth</b>   |            |       | Congo                                       | 2,608.83    | 2.05  |
| Large                            | 42,978.82  | 33.71 | Cote d'Ivoire                               | 2,174.34    | 1.71  |
| Average                          | 63,409.91  | 49.74 | DR Congo                                    | 4,805.87    | 3.77  |
| Small                            | 21,089.84  | 16.54 | Ethiopia                                    | 6,572.69    | 5.16  |
| <b>Mother's characteristics</b>  |            |       | Gabon                                       | 1,959.93    | 1.54  |
| Maternal age                     |            |       | Gambia                                      | 742.5298479 | 0.58  |
| 15-19                            | 9,092.47   | 7.13  | Ghana                                       | 1,896.02    | 1.49  |
| 20-49                            | 118,394.83 | 92.87 | Guinea                                      | 2,236.99    | 1.75  |
| <b>Educational attainment</b>    |            |       | Kenya                                       | 6,065.78    | 4.76  |
| No education                     | 53,320.68  | 41.82 | Lesotho                                     | 1,011.75    | 0.79  |
| Primary                          | 39,847.27  | 31.26 | Liberia                                     | 1,945.96    | 1.53  |
| Secondary                        | 30,365.61  | 23.82 | Malawi                                      | 4,026.75    | 3.16  |
| Higher                           | 3,953.74   | 3.1   | Mali                                        | 5,653.33    | 4.43  |

1  
2  
3  
4  
5  
6  
7  
8  
9  
10  
11  
12  
13  
14  
15  
16  
17  
18  
19  
20  
21  
22  
23  
24  
25  
26  
27  
28  
29  
30  
31  
32  
33  
34  
35  
36  
37  
38  
39  
40  
41  
42  
43  
44  
45  
46  
47  
48  
49  
50  
51  
52  
53  
54  
55  
56  
57  
58  
59  
60

|                                          |            |       |                                 |             |       |
|------------------------------------------|------------|-------|---------------------------------|-------------|-------|
| <b>Working status</b>                    |            |       | Namibia                         | 905.1925663 | 0.71  |
| No                                       | 45,209.54  | 35.49 | Nigeria                         | 7,379.03    | 5.79  |
| Yes                                      | 82,175.43  | 64.51 | Rwanda                          | 4,408.42    | 3.46  |
| <b>Antenatal visits during pregnancy</b> |            |       | Senegal                         | 1,943.55    | 1.52  |
| No                                       | 13,710.30  | 10.76 | Sierra Leone                    | 2,689.41    | 2.11  |
|                                          |            |       |                                 | 854.964580  |       |
| Yes                                      | 113,759.99 | 89.24 | South Africa                    | 7           | 0.67  |
| <b>Postnatal check within 2 months</b>   |            |       | Tanzania                        | 6,060.69    | 4.75  |
| No                                       | 74,571.69  | 58.49 | Togo                            | 2,220.15    | 1.74  |
| Yes                                      | 52,915.61  | 41.51 | Uganda                          | 2,890.85    | 2.27  |
| <b>Place of delivery</b>                 |            |       | Zambia                          | 6,347.36    | 4.98  |
| Home                                     | 39,934.13  | 31.33 | Zimbabwe                        | 3,986.95    | 3.13  |
| Health facility                          | 86,065.94  | 67.51 | <b>Environmental factors</b>    |             |       |
|                                          |            |       | <b>Type of toilet facility</b>  |             |       |
| Other                                    | 1,481.88   | 1.16  | Improved                        | 54,131.64   | 42.47 |
| <b>Wealth status</b>                     |            |       | Unimproved                      | 73,331.75   | 57.53 |
| Poor                                     | 54,066.08  | 42.41 | <b>Source of drinking water</b> |             |       |
| Middle                                   | 25,855.00  | 20.28 | Improved                        | 83,659.77   | 65.63 |
| Rich                                     | 47,566.22  | 37.31 | Unimproved                      | 43,815.68   | 34.37 |
| <b>Age of household head</b>             |            |       | <b>Type of cooking fuel</b>     |             |       |
| Young-adults                             | 54,920.16  | 43.08 | Clean                           | 114,424.88  | 89.76 |
| Middle-aged adults                       | 55,787.81  | 43.76 | Unclean                         | 13,049.03   | 10.24 |
| Old-aged adults                          | 16,778.46  | 13.16 | Geographic region               |             |       |
| <b>Sex of household head</b>             |            |       | Western                         | 53,262.07   | 41.78 |
| Male                                     | 101,698.36 | 79.77 | Eastern                         | 41,863.95   | 32.84 |
| Female                                   | 25,788.94  | 20.23 | Central                         | 25,602.42   | 20.08 |
| <b>Access to electricity</b>             |            |       | South Africa                    | 6,758.86    | 5.3   |
| No                                       | 88,219.82  | 69.2  |                                 |             |       |
| Yes                                      | 39,257.69  | 30.8  |                                 |             |       |

268

269 \*\*\*Figure 1\*\*\*

270 \*\*\*Figure 2\*\*\*

271 **Patient and public involvement**

272 Patients and the public were not involved in the design and conduct of this research

273 **Results**274 **Descriptive Analysis on the Prevalence of Co-existence of Stunting, Wasting and Underweight Varied across Countries and Sub-Regions**

275 The prevalence of co-existence of stunting, wasting and underweight varied across  
 276 countries and sub-regions, with the highest and lowest prevalence of co-existence of  
 277 stunting, wasting, and underweight as Benin (12.14%) and Gambia (0.58%) respectively  
 278

(Figure 1). In terms of sub-region, the highest prevalence of co-existence of stunting, wasting, and underweight was observed in Western Africa (41.78%) and the lowest prevalence in Southern Africa (5.3%) (Figure 2). Significant associations between all the independent variables and co-existence of stunting, wasting, and underweight, except maternal age and age of household head were identified (Table 2).

### **Multinomial Logistic Regression Results of Risk Factors for Co-existence of One and a Co-existence of Two Dimensions of Malnutrition**

Table 3 shows the results of the multinomial regression analysis of the risk factors of co-existence of dimensions of malnutrition (stunting, wasting, and underweight) among children under five years in the SSA. Children aged 1year [RRR = 2.008, 95% CI = 1.930, 2.089], two years [RRR = 2.624, 95% CI = 2.514, 2.739], three years [RRR = 2.122, 95% CI = 2.018, 2.231], and four years [RRR = 1.504, 95% CI = 1.417, 1.597] were more likely to have one or two dimensions of the malnutrition. The risk of having one or a coexistence of two dimensions of malnutrition was higher among children with average size at birth [RRR = 1.320, 95% CI = 1.276, 1.365] and small size at birth [RRR = 1.931, 95% CI = 1.846, 2.020] compared to those with large size at birth. Compared to children whose mothers had attained higher educational level, the risk of developing one or a coexistence of two malnutrition dimensions was higher among children whose mothers had no education [RRR = 2.624, 95% CI = 2.305, 2.987], primary [RRR = 2.189, 95% CI = 1.927, 2.487], and secondary [RRR = 1.751, 95% CI = 1.545, 1.987] educational attainment respectively. However, this risk decreased with increasing educational attainment. The risk of developing one or a coexistence of two malnutrition dimensions was lower among children who were females [RRR = 0.752, 95% CI = 0.731, 0.775], those with second birth order [RRR = 0.938, 95% CI = 0.896, 0.981], those whose mothers were aged 20-49 years [RRR = 0.834, 95% CI = 0.780, 0.891], those whose age of household head was middle-aged [RRR = 0.954, 95% CI = 0.921, 0.987], and those whose source of drinking was unimproved [RRR = 0.959, 95% CI = 0.928, 0.990].

Also, children whose mothers did not visit the antenatal clinic during pregnancy [RRR = 1.139, 95% CI = 1.079, 1.201], those whose parents delivered at home [RRR = 1.183, 95% CI = 1.137, 1.230], those whose mothers had poor wealth status [RRR = 1.297, 95% CI = 1.25, 1.361], had middle wealth status [RRR = 1.195, 95% CI = 1.138, 1.254], had no access to media [RRR = 1.079, 95% CI = 1.042, 1.117], had no access to electricity [RRR = 1.136, 95% CI = 1.083, 1.191], used unclean type of cooking fuel [RRR = 1.177, 95% CI = 1.089, 1.271], and those from rural areas [RRR = 1.050, 95% CI = 1.006, 1.095] had higher risk of reporting one or a coexistence of two malnutrition dimensions.

Children from Burundi and Congo DR were at higher risk of developing one or co-existence of two malnutrition dimensions compared to those from Angola. Lower risk was however reported among children from the remaining countries studied except for Chad, Comoros, Nigeria, and Rwanda, where no statistical significance was found.

### **Co-existence of Three Dimensions of Malnutrition**

Regarding the co-existence of the three dimensions of malnutrition (stunting, wasting, and underweight), age of the child, sex of the child, perceived size of birth size, maternal educational attainment, working status, antenatal visits during pregnancy, place of delivery, wealth status, access to media, and type of toilet facility were found to be

1  
2  
3 323 significant risk factors. The risk of co-existence of the three malnutrition dimensions  
4 324 decreases with the increasing age of children. Thus, children aged 1 year [RRR = 3.714 95%  
5 325 CI = 3.319, 4.156], 2 years [RRR = 2.739, 95% CI = 2.480, 3.222], and 3 years [RRR = 1.464, 95%  
6 326 CI = 1.227, 1.748] were at greater risk of having co-existence of all the three forms of  
7 327 malnutrition. Children who were females were less likely to have a co-existence of the  
8 328 three dimensions of malnutrition compared to their counterpart males [RRR = 0.468, 95%  
9 329 CI = 0.429, 0.510].

12 330 The risk of co-existence of the three dimensions was higher among children with average  
13 331 size at birth [RRR = 1.756, 95% CI = 1.574, 1.958], small size at birth [RRR = 3.818, 95% CI =  
14 332 3.383, 4.308], those whose mothers had no education [RRR = 3.291, 95% CI = 1.961, 5.522],  
15 333 had primary education [RRR = 2.381, 95% CI = 1.417, 4.001], not working [RRR = 1.195, 95% CI  
16 334 = 1.086, 1.314], had no antenatal visits during pregnancy [RRR = 1.364, 95% CI = 1.208, 1.541],  
17 335 delivered at home [RRR = 1.372, 95% CI = 1.232, 1.529], those whose mothers were poor  
18 336 [RRR = 1.408, 95% CI = 1.235, 1.605], had middle wealth status [RRR = 1.214, 95% CI = 1.054,  
19 337 1.397], had no access to media [RRR = 1.255, 95% CI = 1.144, 1.377], and had unimproved  
20 338 toilet facility [RRR = 1.158, 95% CI = 1.032, 1.300].

24 339 Children from Burkina Faso, Burundi, Chad, Nigeria, and Rwanda had a higher risk of having  
25 340 the co-existence of the three dimensions compared to those from Angola. Countries such  
26 341 as Benin, Cameroon, Congo, Gabon, Ghana, Guinea, Kenya, Lesotho, Malawi, Senegal,  
27 342 Zambia, Uganda, Tanzania, Sierra Leone, Zimbabwe, and South Africa had a lower risk  
28 343 among their children having co-existence of the three malnutrition dimensions (.  
29 344  
30 345

346 Table 2: Associations between co-existence of stunting, wasting, and underweight and predictors

| Variable                         | Co-existed (weighted %) | 95% CI  | Chi <sup>2</sup> | Variable                                    | Co-existed (weighted %) | 95% CI  | Chi <sup>2</sup> |
|----------------------------------|-------------------------|---------|------------------|---------------------------------------------|-------------------------|---------|------------------|
| <b>Socio-demographic factors</b> |                         |         |                  | <b>Access to media (tv/radio/newspaper)</b> |                         |         |                  |
| Age of child                     |                         |         | p<0.001          | Yes                                         | 2.14                    | 2.0-2.2 | p<0.001          |
| 0                                | 1.75                    | 1.6-1.9 |                  | No                                          | 3.78                    | 3.6-4.0 |                  |
| 1                                | 4.44                    | 4.2-4.7 |                  | <b>Urbanicity</b>                           |                         |         |                  |
| 2                                | 3.01                    | 2.8-3.2 |                  | Urban                                       | 1.73                    | 1.6-1.9 | p<0.001          |
| 3                                | 1.62                    | 1.4-1.8 |                  | Rural                                       | 3.21                    | 3.1-3.3 |                  |
| 4                                | 1.33                    | 1.1-1.6 |                  | <b>Country</b>                              |                         |         |                  |
| <b>Sex of child</b>              |                         |         |                  | p<0.001                                     |                         |         |                  |
| Male                             | 3.43                    | 3.3-3.6 |                  | Angola                                      | 2.46                    | 2.1-2.8 |                  |
| Female                           | 1.99                    | 1.9-2.1 |                  | Benin                                       | 2.04                    | 1.8-2.2 |                  |
| <b>Birth order</b>               |                         |         |                  | p<0.001                                     |                         |         |                  |
| 1                                | 2.25                    | 2.1-2.4 |                  | Burkina Faso                                | 5.31                    | 4.9-5.8 |                  |
| 2 to 4                           | 2.56                    | 2.4-2.7 |                  | Burundi                                     | 3.76                    | 3.2-4.4 |                  |
| 5 and above                      | 3.23                    | 3.1-3.4 |                  | Cameroon                                    | 1.27                    | 0.9-1.7 |                  |
| <b>Perceived size at birth</b>   |                         |         |                  | p<0.001                                     |                         |         |                  |
| Large                            | 1.78                    | 1.7-1.9 |                  | Chad                                        | 5.86                    | 5.2-6.5 |                  |
| Average                          | 2.6                     | 2.5-2.7 |                  | Comoros                                     | 1.98                    | 1.3-2.9 |                  |
| Small                            | 4.98                    | 4.7-5.3 |                  | Congo                                       | 0.98                    | 0.7-1.5 |                  |
| <b>Mother's characteristics</b>  |                         |         |                  | P =                                         |                         |         |                  |
| Maternal age                     |                         |         | 0.080            | Cote d'Ivoire                               | 2.28                    | 1.7-3.0 |                  |
| 15-19                            | 2.78                    | 2.5-3.1 |                  | DR Congo                                    | 2.66                    | 2.2-3.2 |                  |
|                                  |                         |         |                  | Ethiopia                                    | 3.64                    | 3.2-4.1 |                  |
|                                  |                         |         |                  | Gabon                                       | 0.63                    | 0.3-1.0 |                  |
|                                  |                         |         |                  | Gambia                                      | 3.61                    | 2.4-5.2 |                  |
|                                  |                         |         |                  | Ghana                                       | 1.37                    | 0.9-2.0 |                  |



|    |                                          |      |         |         |                                 |              |
|----|------------------------------------------|------|---------|---------|---------------------------------|--------------|
| 1  |                                          |      |         |         |                                 |              |
| 2  |                                          |      |         |         |                                 |              |
| 3  | 20-49                                    | 2.71 | 2.6-2.8 | Guinea  | 2.26                            | 1.7-2.9      |
| 4  |                                          |      |         |         |                                 |              |
| 5  |                                          |      |         |         |                                 |              |
| 6  | <b>Educational attainment</b>            |      |         | p<0.001 | Kenya                           | 0.94 0.7-1.2 |
| 7  | No education                             | 4.19 | 4.0-4.4 |         | Lesotho                         | 0.86 0.7-1.0 |
| 8  | Primary                                  | 2.09 | 2.0-2.2 |         | Liberia                         | 2.37 1.7-3.1 |
| 9  | Secondary                                | 1.22 | 1.1-1.3 |         | Malawi                          | 1.03 0.7-1.4 |
| 10 | Higher                                   | 0.66 | 0.4-1.0 |         | Mali                            | 3.62 2.5-4.1 |
| 11 |                                          |      |         |         |                                 |              |
| 12 | <b>Working status</b>                    |      |         | p<0.001 | Namibia                         | 1.99 1.2-3.1 |
| 13 | No                                       | 3.13 | 3.0-3.3 |         | Nigeria                         | 4.1 3.7-4.6  |
| 14 | Yes                                      | 2.48 | 2.4-2.6 |         | Rwanda                          | 6.17 5.5-6.9 |
| 15 |                                          |      |         |         |                                 |              |
| 16 | <b>Antenatal visits during pregnancy</b> |      |         |         |                                 |              |
| 17 |                                          |      |         | p<0.001 | Senegal                         | 2.43 1.8-3.2 |
| 18 | No                                       | 5.41 | 5.0-5.8 |         | Sierra Leone                    | 1.94 1.4-2.5 |
| 19 |                                          |      |         |         |                                 | 0.02-        |
| 20 | Yes                                      | 2.39 | 2.3-2.5 |         | South Africa                    | 0.18 0.8     |
| 21 |                                          |      |         |         |                                 |              |
| 22 | <b>Postnatal check within 2 months</b>   |      |         | p<0.001 | Tanzania                        | 1.86 2.1-3.5 |
| 23 | No                                       | 2.93 | 2.8-3.1 |         | Togo                            | 2.72 2.1-3.4 |
| 24 | Yes                                      | 2.42 | 2.3-2.6 |         | Uganda                          | 1.2 0.8-1.7  |
| 25 |                                          |      |         |         |                                 |              |
| 26 | <b>Place of delivery</b>                 |      |         | p<0.001 | Zambia                          | 1.22 1.0-1.5 |
| 27 | Home                                     | 4.36 | 4.2-4.6 |         | Zimbabwe                        | 0.78 0.5-1.1 |
| 28 | Health facility                          | 1.96 | 1.9-2.1 |         |                                 |              |
| 29 |                                          |      |         |         |                                 |              |
| 30 | Other                                    | 2.45 | 1.7-3.3 |         |                                 |              |
| 31 |                                          |      |         |         |                                 | p<0.001      |
| 32 | <b>Wealth status</b>                     |      |         | p<0.001 | Improved                        | 1.76 1.6-1.9 |
| 33 | Poor                                     | 3.46 | 3.3-3.6 |         | Unimproved                      | 3.43 3.3-3.6 |
| 34 |                                          |      |         |         |                                 |              |
| 35 | Middle                                   | 2.74 | 2.5-2.9 |         | <b>Source of drinking water</b> | p<0.001      |
| 36 | Rich                                     | 1.86 | 1.7-2.0 |         | Improved                        | 2.54 2.4-2.6 |
| 37 |                                          |      |         |         |                                 |              |
| 38 | <b>Age of household head</b>             |      |         | p =     | Unimproved                      | 3.06 2.9-3.2 |
| 39 |                                          |      |         | 0.276   |                                 |              |
| 40 |                                          |      |         |         |                                 |              |
| 41 |                                          |      |         |         |                                 |              |
| 42 |                                          |      |         |         |                                 |              |
| 43 |                                          |      |         |         |                                 |              |
| 44 |                                          |      |         |         |                                 |              |
| 45 |                                          |      |         |         |                                 |              |
| 46 |                                          |      |         |         |                                 |              |

|                              |      |         | Type of cooking fuel |      |         |
|------------------------------|------|---------|----------------------|------|---------|
| Young-adults                 | 2.65 | 2.5-2.8 |                      |      | p<0.001 |
| Middle-aged adults           | 2.76 | 2.6-2.9 | Clean                | 0.98 | 1.2     |
| Old-aged adults              | 2.8  | 2.6-3.1 | Unclean              | 2.92 | 2.8-3.0 |
| <b>Sex of household head</b> |      |         | Geographic region    |      | p<0.001 |
| Male                         | 2.82 | 2.7-2.9 | Western              | 3.11 | 3.0-2.3 |
| Female                       | 2.33 | 2.1-2.5 | Eastern              | 2.43 | 2.3-2.6 |
| <b>Access to electricity</b> |      |         | Central              | 2.87 | 2.7-3.1 |
| No                           | 3.21 | 3.1-3.3 | South Africa         | 0.88 | 1.1     |
| Yes                          | 1.61 | 1.5-1.7 |                      |      |         |

347

348

349 **Table 3: Multinomial regression showing risk factors of co-existence of stunting, wasting, and underweight**

| Variable                        | Base outcome (Ref: Normal) |           |         |        | Co-existence of three-dimensions |           |         |        |       |       |
|---------------------------------|----------------------------|-----------|---------|--------|----------------------------------|-----------|---------|--------|-------|-------|
|                                 | RRR                        | Robust SE | p-value | 95% CI | RRR                              | Robust SE | p-value | 95% CI |       |       |
| <b>Age of child (Ref:o)</b>     |                            |           |         |        |                                  |           |         |        |       |       |
| 1                               | 2.008                      | 0.041     | <0.001  | 1.930  | 2.089                            | 3.714     | 0.213   | <0.001 | 3.319 | 4.156 |
| 2                               | 2.624                      | 0.057     | <0.001  | 2.514  | 2.739                            | 2.827     | 0.189   | <0.001 | 2.480 | 3.222 |
| 3                               | 2.122                      | 0.054     | <0.001  | 2.018  | 2.231                            | 1.464     | 0.132   | <0.001 | 1.227 | 1.748 |
| 4                               | 1.504                      | 0.046     | <0.001  | 1.417  | 1.597                            | 1.051     | 0.120   | 0.664  | 0.840 | 1.315 |
| <b>Sex of child (Ref: Male)</b> |                            |           |         |        |                                  |           |         |        |       |       |
| Female                          | 0.752                      | 0.011     | <0.001  | 0.731  | 0.775                            | 0.468     | 0.021   | <0.001 | 0.429 | 0.510 |
| <b>Birth order (Ref: 1)</b>     |                            |           |         |        |                                  |           |         |        |       |       |
| 2                               | 0.938                      | 0.022     | 0.005   | 0.896  | 0.981                            | 1.002     | 0.069   | 0.981  | 0.875 | 1.146 |

|    |                                                     |       |       |        |       |       |       |       |        |       |        |
|----|-----------------------------------------------------|-------|-------|--------|-------|-------|-------|-------|--------|-------|--------|
| 1  |                                                     |       |       |        |       |       |       |       |        |       |        |
| 2  |                                                     |       |       |        |       |       |       |       |        |       |        |
| 3  | 5 and above                                         | 0.969 | 0.026 | 0.238  | 0.920 | 1.021 | 0.995 | 0.076 | 0.952  | 0.858 | 1.155  |
| 4  | <b>Perceived size at birth (Ref:</b>                |       |       |        |       |       |       |       |        |       |        |
| 5  | <b>Large)</b>                                       |       |       |        |       |       |       |       |        |       |        |
| 6  | Average                                             | 1.320 | 0.023 | <0.001 | 1.276 | 1.365 | 1.756 | 0.098 | <0.001 | 1.574 | 1.958  |
| 7  | Small                                               | 1.931 | 0.045 | <0.001 | 1.846 | 2.020 | 3.818 | 0.235 | <0.001 | 3.383 | 4.308  |
| 8  | <b>Maternal age (Ref: 15-19)</b>                    |       |       | <0.001 |       |       |       |       |        |       |        |
| 9  | 20-49                                               | 0.834 | 0.028 | <0.001 | 0.780 | 0.891 | 0.881 | 0.081 | 0.171  | 0.735 | 1.056  |
| 10 | <b>Educational attainment (Ref:</b>                 |       |       |        |       |       |       |       |        |       |        |
| 11 | <b>Higher)</b>                                      |       |       |        |       |       |       |       |        |       |        |
| 12 | No education                                        | 2.624 | 0.173 | <0.001 | 2.305 | 2.987 | 3.291 | 0.869 | <0.001 | 1.961 | 5.522  |
| 13 | Primary                                             | 2.189 | 0.142 | <0.001 | 1.927 | 2.487 | 2.381 | 0.631 | <0.001 | 1.417 | 4.001  |
| 14 | Secondary                                           | 1.751 | 0.112 | <0.001 | 1.545 | 1.985 | 1.617 | 0.420 | 0.065  | 0.971 | 2.691  |
| 15 | <b>Working status (Ref:</b>                         |       |       |        |       |       |       |       |        |       |        |
| 16 | <b>Yes)</b>                                         |       |       |        |       |       |       |       |        |       |        |
| 17 | No                                                  | 1.018 | 0.018 | 0.314  | 0.984 | 1.053 | 1.195 | 0.058 | <0.001 | 1.086 | 1.314  |
| 18 | <b>Antenatal visits during pregnancy (Ref: Yes)</b> |       |       |        |       |       |       |       |        |       | <0.001 |
| 19 | No                                                  | 1.139 | 0.031 | <0.001 | 1.079 | 1.201 | 1.364 | 0.085 | <0.001 | 1.208 | 1.541  |
| 20 | <b>Postnatal check within 2 months (Ref: Yes)</b>   |       |       |        |       |       |       |       |        |       |        |
| 21 | No                                                  | 0.980 | 0.018 | 0.258  | 0.946 | 1.015 | 0.977 | 0.053 | 0.670  | 0.879 | 1.086  |
| 22 | <b>Place of delivery (Ref: Health</b>               |       |       |        |       |       |       |       |        |       |        |
| 23 | <b>facility)</b>                                    |       |       |        |       |       |       |       |        |       |        |
| 24 | Home                                                | 1.183 | 0.024 | <0.001 | 1.137 | 1.230 | 1.372 | 0.076 | <0.001 | 1.232 | 1.529  |
| 25 | Other                                               | 1.046 | 0.073 | 0.517  | 0.912 | 1.201 | 1.047 | 0.207 | 0.818  | 0.710 | 1.543  |
| 26 | <b>Wealth status (Ref: Rich)</b>                    |       |       |        |       |       |       |       |        |       |        |
| 27 | Poor                                                | 1.297 | 0.032 | <0.001 | 1.235 | 1.361 | 1.408 | 0.094 | <0.001 | 1.235 | 1.605  |
| 28 | Middle                                              | 1.195 | 0.029 | <0.001 | 1.138 | 1.254 | 1.214 | 0.087 | 0.007  | 1.054 | 1.397  |
| 29 | <b>Age of household head (Ref: Young-adult)</b>     |       |       |        |       |       |       |       |        |       |        |
| 30 | Middle-aged adults                                  | 0.954 | 0.017 | 0.008  | 0.921 | 0.987 | 1.010 | 0.052 | 0.841  | 0.913 | 1.118  |
| 31 | Old-aged adults                                     | 0.974 | 0.023 | 0.273  | 0.930 | 1.021 | 1.065 | 0.070 | 0.338  | 0.936 | 1.213  |
| 32 | <b>Sex of household head (Ref:</b>                  |       |       |        |       |       |       |       |        |       |        |
| 33 | <b>Male)</b>                                        |       |       |        |       |       |       |       |        |       |        |
| 34 | Female                                              | 0.977 | 0.019 | 0.223  | 0.940 | 1.015 | 1.035 | 0.060 | 0.548  | 0.925 | 1.159  |
| 35 |                                                     |       |       |        |       |       |       |       |        |       |        |
| 36 |                                                     |       |       |        |       |       |       |       |        |       |        |
| 37 |                                                     |       |       |        |       |       |       |       |        |       |        |
| 38 |                                                     |       |       |        |       |       |       |       |        |       |        |
| 39 |                                                     |       |       |        |       |       |       |       |        |       |        |
| 40 |                                                     |       |       |        |       |       |       |       |        |       |        |
| 41 |                                                     |       |       |        |       |       |       |       |        |       |        |
| 42 |                                                     |       |       |        |       |       |       |       |        |       |        |
| 43 |                                                     |       |       |        |       |       |       |       |        |       |        |
| 44 |                                                     |       |       |        |       |       |       |       |        |       |        |
| 45 |                                                     |       |       |        |       |       |       |       |        |       |        |
| 46 |                                                     |       |       |        |       |       |       |       |        |       |        |

**Access to media (tv/radio/newspaper) (Ref: Yes)**

|    |       |       |        |       |       |       |       |        |       |       |
|----|-------|-------|--------|-------|-------|-------|-------|--------|-------|-------|
| No | 1.079 | 0.019 | <0.001 | 1.042 | 1.117 | 1.255 | 0.059 | <0.001 | 1.144 | 1.377 |
|----|-------|-------|--------|-------|-------|-------|-------|--------|-------|-------|

**Access to electricity (Ref: Yes)**

|    |       |       |        |       |       |       |       |       |       |       |
|----|-------|-------|--------|-------|-------|-------|-------|-------|-------|-------|
| No | 1.136 | 0.027 | <0.001 | 1.083 | 1.191 | 1.062 | 0.077 | 0.404 | 0.922 | 1.225 |
|----|-------|-------|--------|-------|-------|-------|-------|-------|-------|-------|

**Type of toilet facility (Ref: Improved)**

|            |       |       |       |       |       |       |       |       |       |       |
|------------|-------|-------|-------|-------|-------|-------|-------|-------|-------|-------|
| Unimproved | 1.027 | 0.019 | 0.148 | 0.991 | 1.065 | 1.158 | 0.068 | 0.013 | 1.032 | 1.300 |
|------------|-------|-------|-------|-------|-------|-------|-------|-------|-------|-------|

**Source of drinking water (Ref: Improved)**

|            |       |       |       |       |       |       |       |       |       |       |
|------------|-------|-------|-------|-------|-------|-------|-------|-------|-------|-------|
| Unimproved | 0.959 | 0.016 | 0.011 | 0.928 | 0.990 | 0.968 | 0.044 | 0.474 | 0.885 | 1.058 |
|------------|-------|-------|-------|-------|-------|-------|-------|-------|-------|-------|

**Type of cooking fuel (Ref: Clean)**

|         |       |       |        |       |       |       |       |       |       |       |
|---------|-------|-------|--------|-------|-------|-------|-------|-------|-------|-------|
| Unclean | 1.177 | 0.046 | <0.001 | 1.089 | 1.271 | 1.316 | 0.205 | 0.078 | 0.970 | 1.787 |
|---------|-------|-------|--------|-------|-------|-------|-------|-------|-------|-------|

**Urbanicity (Ref: Urban)**

|       |       |       |       |       |       |       |       |       |       |       |
|-------|-------|-------|-------|-------|-------|-------|-------|-------|-------|-------|
| Rural | 1.050 | 0.023 | 0.024 | 1.006 | 1.095 | 0.943 | 0.060 | 0.359 | 0.832 | 1.069 |
|-------|-------|-------|-------|-------|-------|-------|-------|-------|-------|-------|

**Country (Ref: Angola)**

|       |       |       |        |       |       |       |       |        |       |       |
|-------|-------|-------|--------|-------|-------|-------|-------|--------|-------|-------|
| Benin | 0.651 | 0.028 | <0.001 | 0.598 | 0.708 | 0.625 | 0.078 | <0.001 | 0.489 | 0.798 |
|-------|-------|-------|--------|-------|-------|-------|-------|--------|-------|-------|

|              |       |       |       |       |       |       |       |        |       |       |
|--------------|-------|-------|-------|-------|-------|-------|-------|--------|-------|-------|
| Burkina Faso | 0.952 | 0.046 | 0.304 | 0.866 | 1.046 | 1.946 | 0.241 | <0.001 | 1.526 | 2.481 |
|--------------|-------|-------|-------|-------|-------|-------|-------|--------|-------|-------|

|         |       |       |        |       |       |       |       |        |       |       |
|---------|-------|-------|--------|-------|-------|-------|-------|--------|-------|-------|
| Burundi | 1.580 | 0.084 | <0.001 | 1.424 | 1.753 | 2.049 | 0.295 | <0.001 | 1.545 | 2.718 |
|---------|-------|-------|--------|-------|-------|-------|-------|--------|-------|-------|

|          |       |       |        |       |       |       |       |        |       |       |
|----------|-------|-------|--------|-------|-------|-------|-------|--------|-------|-------|
| Cameroon | 0.669 | 0.041 | <0.001 | 0.593 | 0.756 | 0.398 | 0.086 | <0.001 | 0.261 | 0.609 |
|----------|-------|-------|--------|-------|-------|-------|-------|--------|-------|-------|

|      |       |       |       |       |       |       |       |       |       |       |
|------|-------|-------|-------|-------|-------|-------|-------|-------|-------|-------|
| Chad | 0.910 | 0.047 | 0.067 | 0.823 | 1.007 | 1.505 | 0.184 | 0.001 | 1.184 | 1.913 |
|------|-------|-------|-------|-------|-------|-------|-------|-------|-------|-------|

|         |       |       |       |       |       |       |       |       |       |       |
|---------|-------|-------|-------|-------|-------|-------|-------|-------|-------|-------|
| Comoros | 0.883 | 0.076 | 0.149 | 0.745 | 1.046 | 0.656 | 0.184 | 0.133 | 0.378 | 1.138 |
|---------|-------|-------|-------|-------|-------|-------|-------|-------|-------|-------|

|       |       |       |        |       |       |       |       |       |       |       |
|-------|-------|-------|--------|-------|-------|-------|-------|-------|-------|-------|
| Congo | 0.674 | 0.052 | <0.001 | 0.580 | 0.783 | 0.472 | 0.127 | 0.005 | 0.279 | 0.800 |
|-------|-------|-------|--------|-------|-------|-------|-------|-------|-------|-------|

|               |       |       |        |       |       |       |       |       |       |       |
|---------------|-------|-------|--------|-------|-------|-------|-------|-------|-------|-------|
| Cote d'Ivoire | 0.734 | 0.052 | <0.001 | 0.638 | 0.844 | 0.739 | 0.153 | 0.144 | 0.492 | 1.109 |
|---------------|-------|-------|--------|-------|-------|-------|-------|-------|-------|-------|

|          |       |       |        |       |       |       |       |       |       |       |
|----------|-------|-------|--------|-------|-------|-------|-------|-------|-------|-------|
| DR Congo | 1.229 | 0.069 | <0.001 | 1.100 | 1.373 | 1.351 | 0.216 | 0.059 | 0.988 | 1.847 |
|----------|-------|-------|--------|-------|-------|-------|-------|-------|-------|-------|

|          |       |       |        |       |       |       |       |       |       |       |
|----------|-------|-------|--------|-------|-------|-------|-------|-------|-------|-------|
| Ethiopia | 0.810 | 0.045 | <0.001 | 0.726 | 0.904 | 0.813 | 0.123 | 0.172 | 0.604 | 1.095 |
|----------|-------|-------|--------|-------|-------|-------|-------|-------|-------|-------|

|       |       |       |        |       |       |       |       |       |       |       |
|-------|-------|-------|--------|-------|-------|-------|-------|-------|-------|-------|
| Gabon | 0.495 | 0.044 | <0.001 | 0.415 | 0.590 | 0.319 | 0.149 | 0.014 | 0.128 | 0.796 |
|-------|-------|-------|--------|-------|-------|-------|-------|-------|-------|-------|

|        |       |       |       |       |       |       |       |       |       |       |
|--------|-------|-------|-------|-------|-------|-------|-------|-------|-------|-------|
| Gambia | 0.732 | 0.073 | 0.002 | 0.603 | 0.889 | 1.001 | 0.246 | 0.997 | 0.618 | 1.620 |
|--------|-------|-------|-------|-------|-------|-------|-------|-------|-------|-------|

|       |       |       |        |       |       |       |       |       |       |       |
|-------|-------|-------|--------|-------|-------|-------|-------|-------|-------|-------|
| Ghana | 0.453 | 0.037 | <0.001 | 0.386 | 0.531 | 0.545 | 0.126 | 0.009 | 0.346 | 0.857 |
|-------|-------|-------|--------|-------|-------|-------|-------|-------|-------|-------|

|        |       |       |        |       |       |       |       |       |       |       |
|--------|-------|-------|--------|-------|-------|-------|-------|-------|-------|-------|
| Guinea | 0.798 | 0.051 | <0.001 | 0.705 | 0.904 | 0.726 | 0.132 | 0.078 | 0.509 | 1.036 |
|--------|-------|-------|--------|-------|-------|-------|-------|-------|-------|-------|

|       |       |       |        |       |       |       |       |        |       |       |
|-------|-------|-------|--------|-------|-------|-------|-------|--------|-------|-------|
| Kenya | 0.553 | 0.030 | <0.001 | 0.498 | 0.615 | 0.321 | 0.055 | <0.001 | 0.230 | 0.449 |
|-------|-------|-------|--------|-------|-------|-------|-------|--------|-------|-------|

|         |       |       |       |       |       |       |       |       |       |       |
|---------|-------|-------|-------|-------|-------|-------|-------|-------|-------|-------|
| Lesotho | 0.777 | 0.068 | 0.004 | 0.654 | 0.924 | 0.369 | 0.139 | 0.008 | 0.177 | 0.772 |
|---------|-------|-------|-------|-------|-------|-------|-------|-------|-------|-------|

|         |       |       |        |       |       |       |       |       |       |       |
|---------|-------|-------|--------|-------|-------|-------|-------|-------|-------|-------|
| Liberia | 0.658 | 0.052 | <0.001 | 0.565 | 0.768 | 0.776 | 0.187 | 0.291 | 0.484 | 1.243 |
|---------|-------|-------|--------|-------|-------|-------|-------|-------|-------|-------|

1  
2  
3  
4  
5  
6  
7  
8  
9  
10  
11  
12  
13  
14  
15  
16  
17  
18  
19  
20  
21  
22  
23  
24  
25  
26  
27  
28  
29  
30  
31  
32  
33  
34  
35  
36  
37  
38  
39  
40  
41  
42  
43  
44  
45  
46

350

|              |       |       |        |       |       |       |       |        |       |       |
|--------------|-------|-------|--------|-------|-------|-------|-------|--------|-------|-------|
| Malawi       | 0.794 | 0.046 | <0.001 | 0.708 | 0.889 | 0.447 | 0.098 | <0.001 | 0.291 | 0.687 |
| Mali         | 0.600 | 0.031 | <0.001 | 0.541 | 0.664 | 1.006 | 0.138 | 0.963  | 0.769 | 1.316 |
| Namibia      | 0.680 | 0.063 | <0.001 | 0.568 | 0.815 | 0.849 | 0.225 | 0.535  | 0.505 | 1.426 |
| Nigeria      | 0.953 | 0.045 | 0.310  | 0.868 | 1.046 | 1.527 | 0.199 | 0.001  | 1.183 | 1.972 |
| Rwanda       | 1.059 | 0.057 | 0.285  | 0.954 | 1.176 | 1.991 | 0.260 | <0.001 | 1.541 | 2.571 |
| Senegal      | 0.660 | 0.048 | <0.001 | 0.572 | 0.761 | 0.643 | 0.129 | 0.028  | 0.434 | 0.952 |
| Sierra Leone | 0.641 | 0.040 | <0.001 | 0.567 | 0.725 | 0.656 | 0.129 | 0.031  | 0.447 | 0.963 |
| South Africa | 0.788 | 0.087 | 0.031  | 0.634 | 0.979 | 0.108 | 0.065 | 0.000  | 0.033 | 0.352 |
| Tanzania     | 0.772 | 0.039 | <0.001 | 0.699 | 0.851 | 0.699 | 0.111 | 0.024  | 0.512 | 0.954 |
| Togo         | 0.557 | 0.036 | <0.001 | 0.490 | 0.633 | 0.838 | 0.150 | 0.324  | 0.590 | 1.190 |
| Uganda       | 0.627 | 0.039 | <0.001 | 0.556 | 0.708 | 0.421 | 0.089 | <0.001 | 0.278 | 0.637 |
| Zambia       | 0.904 | 0.046 | 0.046  | 0.818 | 0.998 | 0.519 | 0.092 | <0.001 | 0.366 | 0.736 |
| Zimbabwe     | 0.693 | 0.039 | <0.001 | 0.620 | 0.775 | 0.344 | 0.083 | <0.001 | 0.214 | 0.554 |

For peer review only

## 351 DISCUSSION

352 The study investigated the socio-demographic and environmental risk factors of the co-  
353 existence of wasting, stunting, and underweight among children under age 5 in sub-  
354 Saharan Africa using data from DHS conducted in 31 countries between 2010 and 2019. The  
355 study found that the countries with the highest and lowest prevalence of co-existence of  
356 stunting, wasting, and underweight were Benin (12.14%) and Gambia (0.58%) respectively.  
357 In terms of geographic region, the highest prevalence of co-existence of stunting, wasting,  
358 and underweight was observed in Western Africa (41.78%) and the lowest prevalence in  
359 Southern Africa (5.3%). Age of the child, sex of the child, the perceived size of birth size,  
360 maternal educational attainment, working status, antenatal visits during pregnancy, place  
361 of delivery, wealth status, access to media, and type of toilet facility was also found as  
362 significant risk factors. The disparities in the prevalence among the countries and  
363 geographical regions could be attributed to the nutritional practices and beliefs practised  
364 in the countries and geographical regions. Differences in the health policies provided by  
365 governments in the various countries could also account for the disparities noted. This  
366 finding implies that countries that have high prevalence should take critical lessons from  
367 the countries that are doing well regarding the implementation of nutritional policies and  
368 interventions (e.g., increasing dietary supplementation, increasing dietary diversity) that  
369 target the reduction of the co-existence of wasting, stunting, and underweight among  
370 children under age 5 in sub-Saharan Africa<sup>2</sup>.

371 Similar to previous studies<sup>1,3</sup>, this study found that children aged 1 year, 2 years, and 3 years  
372 were at greater risk of having co-existence of all the three forms of malnutrition compared  
373 to those aged 0. A plausible reason for this finding could be that as children grow their  
374 energy needs also increase<sup>1</sup>, increasing their risk of having all three nutritional conditions.  
375 Alternatively, since these nutritional conditions may manifest after long durations of  
376 improper nutritional practices or undernutrition<sup>1,3</sup>, older children may be at higher risk of  
377 having all three nutritional conditions. The finding suggests that complementary foods  
378 given to children as they grow are inadequate. To reduce the risk of co-existence of  
379 stunting, wasting and underweight among under 5 children, the health sectors in the  
380 various countries should invest heavily in providing adequate complementary feeding to  
381 this category of children.

382 Corroborating the findings of other studies<sup>1,3,31,32</sup>, this study also found that children who  
383 were females were less likely to have a co-existence of the three dimensions of  
384 malnutrition compared to their male counterparts. An acceptable explanation for this  
385 finding could be the biological variations in morbidity between males and females at that  
386 young age<sup>3</sup>. It is also possible that since male children have higher birth weight compared  
387 to females, they require more energy<sup>1,33</sup>, which increases the risk of males having all three  
388 nutritional conditions. Moreover, male children are perceived to be hungrier than females,  
389 therefore breastfeeding alone could be insufficient or inadequate<sup>3,34</sup>, increasing their  
390 susceptibility to having the three nutritional conditions. The finding suggests that male  
391 children should be given critical attention in the development and implementation of  
392 nutritional programs (e.g., dietary supplementation) to mitigate the co-existence of  
393 stunting, wasting, and underweight among these male children under 5.

394 The study found that the risk of co-existence of the three dimensions of malnutrition was  
395 higher among children with the average size at birth and small size at birth compared to

1  
2  
3 396 children with large size at birth. It has been proven that malnutrition in children is partly  
4 397 influenced by maternal nutrition practices. Hence, mothers' appropriate nutritional  
5 398 behaviours during the prenatal and postnatal period is key to improve child growth.  
6 399 Conversely, maternal undernutrition causes low maternal BMI, which in turn affects the  
7 400 fetus to poor development often associated with small birth size and low birth  
8 401 weight<sup>1,3,21,35</sup>. This finding indicates that mothers of children under 5 should continuously  
9 402 be educated on the best nutritional practices such as exclusive breastfeeding,  
10 403 complementary feeding, and dietary supplementation. These strategies will help  
11 404 ameliorate the risk of acquiring health conditions associated with malnutrition among  
12 405 children under 5.

13  
14  
15  
16 406 The risk of co-existence of the three dimensions was higher among children whose  
17 407 mothers had no education and primary education compared to those whose mothers had  
18 408 higher education. Mothers who have attained higher education are better informed about  
19 409 improved childcare practices<sup>36</sup>, are more empowered to make health decisions<sup>37</sup>, practice  
20 410 good personal hygiene<sup>37</sup>, are more likely to use the health facility<sup>38</sup>, proper feeding  
21 411 practices<sup>35</sup> and childcare in times of illness<sup>35,39</sup>. This finding suggests that mothers with  
22 412 no formal or little education are neglected in nutritional programs that help to eliminate  
23 413 stunting, wasting, and underweight. Hence, they should be given the needed  
24 414 consideration to deal with this persistent health issue.

25  
26  
27  
28 415 This study also found that the risk of co-existence of the three dimensions was higher  
29 416 among children whose mothers were not working compared to those whose mothers  
30 417 were working. Women's employment status indicate their ability to afford proper  
31 418 nutritional products and health care services<sup>35,39</sup>. Therefore, if mothers are not employed,  
32 419 the children become highly susceptible or vulnerable because mothers are unlikely to meet  
33 420 their nutritional needs or requirements. Mothers with children under 5 with such  
34 421 disadvantaged background should be given subsidies on children's nutritional products  
35 422 and perhaps, free access to health care services by governmental and non-governmental  
36 423 organizations. This step will be significant in reducing the risks of the co-existence of  
37 424 stunting, wasting, and underweight among children under 5.

38  
39  
40  
41 425 The risk of co-existence of the three dimensions was higher among children whose  
42 426 mothers had no antenatal visits during pregnancy compared to those whose mothers had  
43 427 antenatal visits during pregnancy. Specifically, mothers who attend antenatal services are  
44 428 usually educated on the best practices of nutrition and general healthcare, which hitherto  
45 429 would not be known by these mothers<sup>37</sup>. Therefore, mothers who did not have antenatal  
46 430 visits may lack some knowledge about proper nutritional practices, increasing their  
47 431 children's risk of having these malnutrition related challenges. Regular antenatal visits  
48 432 could reduce children's risk of having stunting, underweight, and wasting, therefore,  
49 433 mothers should continuously be encouraged to go for antenatal care services in their  
50 434 countries.

51  
52  
53  
54 435 Children who were delivered at home compared to children who were delivered at a health  
55 436 facility were found to have a higher risk of co-existence of the three dimensions. Since  
56 437 mothers who deliver at home do not receive any expert nutritional advice from a qualified  
57 438 health practitioner<sup>36</sup>, the children of such mothers are at higher risk of having these  
58 439 conditions because poor and/ or inadequate dietary practices. This finding shows that  
59 440 facility delivery may help reduce the risk of co-existence of stunting, wasting, and

1  
2  
3 441 underweight among children under 5. Therefore, mothers should regularly be educated  
4 442 on the need to opt for facility delivery because its positive implications on children's  
5 443 growth. .

7 444 The risk of co-existence of the three dimensions was higher among children whose  
8 445 mothers were poor and had middle wealth status compared to those whose mothers were  
9 446 rich. Usually, mothers who have average income may lack the financial capacity to feed  
11 447 themselves and their children properly and adequately<sup>3,17,35</sup> , increasing the children's risk  
12 448 of being stunted, underweight or wasted. Likewise, mothers from poor and middle wealth  
13 449 quintile may not have access to quality nutritional products and health care systems<sup>35,39</sup> ,  
15 450 making their children more susceptible to having all three nutritional conditions. This  
16 451 finding implies that women from poor economic backgrounds should be assisted with  
17 452 nutritional products and services to facilitate the reduction in the risks of the co-existence  
18 453 of stunting, wasting, and underweight among children under 5.

20 454 The risk of co-existence of the three dimensions was higher among children whose  
21 455 mothers had no access to media compared to those whose mothers had access to media.  
22 456 Since many people are educated about proper nutritional practices through the mass  
23 457 media<sup>10,11</sup> , mothers who have no access to the media may lack certain important nutritional  
24 458 information they need. This information gap could increase children's risk of having all  
25 459 three nutritional conditions through improper dietary practices from their mothers. For  
26 460 instance, mothers' access to appropriate information from the media would help them  
27 461 decide on which proper diets or food commodities are readily available on market for their  
28 462 children. More pragmatic ways of reaching mothers who have no access to media are  
29 463 encouraged. Regular outreach or sensitization programs to target women without access  
30 464 to media for example could help in reducing the risks of the co-existence of stunting,  
31 465 wasting, and underweight among children under 5.

35 466 Children whose mothers had unimproved toilet facilities were found to have a higher risk  
36 467 of co-existence of the three dimensions of child malnutrition compared to those whose  
37 468 mothers had improved toilet facility. Insanitary or unhygienic toilet conditions may  
38 469 increase mother-child-environment interactions that may result in increased exposure to  
39 470 childhood diseases and other opportunistic infections (e.g., diarrhoeal episodes, fever)  
40 471 either through consumption of contaminated foods, drinking water or poor  
41 472 environmental sanitation<sup>21</sup> . These conditions have been shown to cause growth  
42 473 retardation in children. Governmental and non-governmental organizations should  
43 474 support with the provision of improved household toilet facilities for poorer communities  
44 475 to help minimize the risks of the co-existence of child malnutrition indicators.

48 476 Children from Burkina Faso, Burundi, Chad, Nigeria, and Rwanda had a higher risk of having  
49 477 the co-existence of the three dimensions compared to those from Angola. On the other  
50 478 hand, countries such as Benin, Cameroon, Congo, Gabon, Ghana, Guinea, Kenya, Lesotho,  
51 479 Malawi, Senegal, Zambia, Uganda, Tanzania, Sierra Leone, Zimbabwe, and South Africa  
52 480 had a lower risk among their children having co-existence of the three malnutrition  
53 481 dimensions. The sub-regional and country-specific variations in socio-economic, agro-  
54 482 ecological and geographical characteristics may strongly influence the nutritional status of  
55 483 children because inadequate food supplies, limited access to arable land for agriculture,  
56 484 unfavorable climatic conditions (e.g., desertification), rapid population growth, and  
57 485 increasing cost of living may determine food access, availability and production in studied



1  
2  
3 486 countries in SSA<sup>40,41</sup>. Governmental priorities should intensify efforts to minimize the risk  
4 487 of co-existence of stunting, wasting, and underweight among children under age 5 with  
5 488 sound socio-economic and sustainable human capital development.

## 7 489 **Conclusions**

9 490 The study investigated the socio-demographic and environmental risk factors of the co-  
10 491 existence of wasting, stunting, and underweight among children under age 5 in sub-  
11 492 Saharan Africa using data from DHS conducted in 31 countries between 2010 and 2019. The  
12 493 study found that the prevalence of co-existence of stunting, wasting, and underweight  
13 494 ranged from 0.58 % in the Gambia to 12.14% in Benin. The study also found that the  
14 495 prevalence of co-existence of stunting, wasting, and underweight was high in Western  
15 496 Africa (41.78%) but low in Southern Africa (5.3%). The significant findings show that the  
16 497 disadvantaged have more risks of the co-existence of wasting, stunting and underweight  
17 498 among under 5 children in selected SSA countries. Findings require context nutrition-  
18 499 specific interventions such as complimentary feeding, dietary supplementation and  
19 500 increasing dietary diversity to promote children feeding practices across the studied  
20 501 countries. Besides, country-specific sustainable human capital developmental agenda  
21 502 (e.g., empowerment initiatives, entrepreneurial training), especially among mothers is  
22 503 required to help improve children's dietary intake by governments and partnering  
23 504 institutions or agencies.

24 505 **Acknowledgements:** The authors thank the MEASURE DHS project for their support and  
25 506 for free access to the original data

26 507 **Contributors:** IA developed the study concept and performed the data analysis. AS, ED,  
27 508 JBF, JEH, RGA, BA, and BOA drafted and revised the manuscript critically for its intellectual  
28 509 content. All authors read and approved the final manuscript.

29 510  
30 511 **Funding:** This research received no specific grant from any funding agency in the public,  
31 512 commercial or not-for-profit sectors

32 513

33 514

34 515 **Competing interests:** None

35 516

36 517 **Patient consent for publication :**No consent to publish was needed for this study  
37 518 as we did not use any details, images or videos related to individual participants. In  
38 519 addition, data used are available in the public domain.

39 520

## 40 521 **Ethics Approval and consent to participate**

41 522 DHS reports ethical clearance are provided by the Ethics Committee of ORC Macro Inc. as  
42 523 well as Ethics Boards of partner institutions (e.g., Ministries of Health) from studied  
43 524 countries. The DHS procedures require that principles for the protection of respondents'  
44 525 anonymity and confidentiality are adhered. Inner City Fund International also guarantees  
45 526 that the survey protocols meet the United States Department of Health and Human  
46 527 Services' regulations for the respect of human subjects. The current study used a  
47 528 secondary data, hence, no further ethical approval was sought. The datasets are freely  
48 529 available for download and usage at <https://dhsprogram.com/data/available-datasets.cfm>.

1  
2  
3 5304 531 **Provenance and peer review :Not commissioned; externally peer reviewed.**

5 532

6 533 **Data availability statement:** Data are available in a public, open access

7 534 repository. Data for this study were sourced from Demographic and Health surveys

8 535 (DHS) and available here: <http://dhsprogram.com/data/available-datasets.cfm>

9 536

10 537

11 538 **References**12 539 1. Amare ZY, Ahmed ME, Mehari AB. Determinants of nutritional status among  
13 540 children under age 5 in Ethiopia: further analysis of the 2016 Ethiopia demographic  
14 541 and health survey. *Global Health* 2019;15(1):1–11.15 542 2. Anin SK, Saaka M, Fischer F, Kraemer A. Association between Infant and Young  
16 543 Child Feeding (IYCF) Indicators and the Nutritional Status of Children (6–23  
17 544 Months) in Northern Ghana. *Nutrients* 2020; 12, 2565.  
18 545 <https://doi.org/10.3390/nu12092565>19 546 3. Madiba S, Chelule PK, Mokgatle MM. Attending informal preschools and daycare  
20 547 centers is a risk factor for underweight, stunting and wasting in children under the  
21 548 age of five years in underprivileged communities in South Africa. *International  
22 549 Journal of Environmental Research and Public Health* 2019; 16(14), 2589.23 550 4. Yalew BM, Amsalu F, Bikes D. Prevalence and factors associated with stunting,  
24 551 underweight and wasting: a community based cross sectional study among  
25 552 children age 6-59 months at Lalibela Town, Northern Ethiopia. *J Nutr Disorders Ther*  
26 553 2014; 4(147), 2161-0509.27 554 5. WHO. Nutrition Landscape Information System (NLIS) Country Profile Indicators:  
28 555 Interpretation Guide; World Health Organization: Geneva, Switzerland, 2010.29 556 6. Akombi BJ, Agho KE, Hall JJ, Wali N, Renzaho A, Merom D. Stunting, wasting and  
30 557 underweight in sub-Saharan Africa: a systematic review. *International Journal of  
31 558 Environmental Research and Public Health* 2017; 14(8), 863.32 559 7. WHO. Global nutrition targets 2025: policy brief series (WHO/NMH/NHD/14.2).  
33 560 Geneva: World Health Organization; 2014.  
34 561 [https://apps.who.int/iris/bitstream/handle/10665/149018/WHO\\_NMH\\_NHD\\_14.2\\_e  
35 562 ng.pdf](https://apps.who.int/iris/bitstream/handle/10665/149018/WHO_NMH_NHD_14.2_eng.pdf)36 563 8. Black RE, Victora CG, Walker SP, Bhutta ZA, Christian P, De Onis M, Ezzati M,  
37 564 Grantham-McGregor S, Katz J, Martorell R, Uauy R, Maternal and Child Nutrition  
38 565 Study Group. Maternal and child undernutrition and overweight in low-income and  
39 566 middle-income countries. *The lancet* 2013; 382(9890), 427-451.40 567 9. World Health Organization. Levels and trends in child malnutrition: key findings of  
41 568 the 2019 edition (No. WHO/NMH/NHD/19.20). World Health Organization. 2019.42 569 10. De Onis M, Onyango A, Borghi E, Siyam A, Blössner M, Lutter C. Worldwide  
43 570 implementation of the WHO child growth standards. *Public Health Nutrition*  
44 571 2012; 15(9), 1603-1610.45 572 11. De Onis M, Blössner M, Borghi E. Prevalence and trends of stunting among pre-  
46 573 school children, 1990–2020. *Public Health Nutrition* 2012; 15(1), 142-148.47 574 12. World Health Organization. Community-based management of severe acute  
48 575 malnutrition: a joint statement by the World Health Organization, the World Food

- 1  
2  
3 576 Programme, the United Nations System Standing Committee on Nutrition and the  
4 577 United Nations Children's Fund. 2007.
- 5 578  
6 579 13. UNICEF. Levels and trends in child malnutrition, United Nations Children's fund  
7 580 (UNICEF), World Health Organization, International Bank for Reconstruction and  
8 581 Development/The World Bank. Levels and trends in child malnutrition: key findings  
9 582 of the 2019 edition of the joint child malnutrition estimates. Geneva: World Health  
10 583 Organization; 2019 Licence: CC BY-NC-SA 3.0 IGO; 2019.
- 11 584  
12 585 14. Central Statistical Agency (CSA)[Ethiopia] and ICF. Ethiopia demographic and  
13 586 health survey, Addis Ababa, Ethiopia and Calverton, Maryland, USA. 2016.
- 14 587  
15 588 15. Yaya S, Uthman OA, Ekholuenetale M, Bishwajit G, Adjiwanou V. Effects of birth  
16 589 spacing on adverse childhood health outcomes: evidence from 34 countries in sub-  
17 590 Saharan Africa. *J Matern & Neonatal Med* 2020;33(20):3501–8.
- 18 591  
19 592 16. Armah FA, Ekumah B, Yawson DO, Odoi JO, Afitiri A, Nyieku FE, et al. Predictive  
20 593 Probabilities of Access to Clean Cooking: Evidence from the Demographic and  
21 594 Health Surveys in 31 Countries in Sub-Saharan Africa. 2019;12(3):320–2.
- 22 595  
23 596 17. Mamabolo RL, Alberts M, Steyn NP, Delemarre-van de Waal HA, Levitt NS.  
24 597 Prevalence and determinants of stunting and overweight in 3-year-old black South  
25 598 African children residing in the Central Region of Limpopo Province, South  
26 599 Africa. *Public Health Nutrition* 2005; 8(5), 501-508.
- 27 600  
28 601 18. Novignon J, Aboagye E, Agyemang OS, Aryeetey G. Socioeconomic-related  
29 602 inequalities in child malnutrition: evidence from the Ghana multiple indicator  
30 603 cluster survey. *Health Economics Review* 2015; 5(1), 1-11.
- 31 604  
32 605 19. Bain LE, Awah PK, Geraldine N, Kindong NP, Siga Y, Bernard N, Tanjeko AT.  
33 606 Malnutrition in Sub-Saharan Africa: burden, causes and prospects. *Pan African  
34 607 Medical Journal* 2013; 15(1).
- 35 608  
36 609 20. Fanzo J. The nutrition challenge in sub-Saharan Africa (No. 2012-012). United  
37 610 Nations Development Programme, Regional Bureau for Africa. 2012.
- 38 611  
39 612 21. Akombi BJ, Agho KE, Merom D, Renzaho AM, Hall JJ. Child malnutrition in sub-  
40 613 Saharan Africa: A meta-analysis of demographic and health surveys (2006-2016).  
41 614 *PLoS One* 2017;12(5): e0177338.
- 42 615  
43 616 22. World Health Organization. United Nations Children's Fund (2009) WHO child  
44 617 growth standards and the identification of severe acute malnutrition in infants and  
45 618 children A Joint Statement. World Health Organization. 2014; 11.
- 46 619  
47 620 23. Corsi DJ, Neuman M, Finlay JE, Subramanian SV. Demographic and health surveys:  
48 621 a profile. *International Journal of Epidemiology* 2012; 41(6), 1602-1613.
- 49 622  
50 623 24. Aliaga A, Ruilin R. Cluster optimal sample size for demographic and health surveys.  
51 624 In 7th International Conference on Teaching Statistics–ICOTS (Vol. 7, pp. 2-7). 2006.
- 52 625  
53 626 25. Von Elm E, Altman DG, Egger M, Pocock SJ, Gøtzsche PC, Vandenbroucke JP, Strobe  
54 627 Initiative. The Strengthening the Reporting of Observational Studies in  
55 628 Epidemiology (STROBE) Statement: guidelines for reporting observational  
56 629 studies. *International journal of surgery*. 2014; 12(12), 1495-1499.
- 57 630  
58 631 26. Collins J, Ward BM, Snow P, Kippen S, Judd F. Compositional, Contextual, and  
59 632 Collective Community Factors in Mental Health and Well-Being in Australian Rural  
60 633 Communities. *Qualitative Health Research* 2017; 27(5), 677–687.  
<https://doi.org/10.1177/1049732315625195>
- 61 634  
62 635 27. Pol LG, Thomas RK. The demography of health and health care. Springer Science &  
63 636 Business Media. 2001.

- 1  
2  
3 623 28. Armah FA, Ekumah B, Yawson DO, Odoi JO, Afitiri AR, Nyieku F.E. Access to  
4 624 improved water and sanitation in sub-Saharan Africa in a quarter century. *Heliyon*  
5 625 2018; 4(11), e00931. <https://doi.org/10.1016/j.heliyon.2018.e00931>  
6 626  
7 626 29. Ross CE, Mirowsky J. Neighborhood socioeconomic status and health: context or  
8 627 composition? *City & Community* 2008; 7(2), 163–179.  
9 628  
10 628 30. Amegah AK, Boachie J, Näyhä S, Jaakkola JJK. Association of biomass fuel use with  
11 629 reduced body weight of adult Ghanaian women. *J Expo Sci Environ Epidemiol* 2019;1.  
12 630  
13 631 31. Alemayehu M, Tinsae F, Hailelassie K, Seid O, Gebregziabher G, Yebyo H.  
14 632 Undernutrition status and associated factors in under-5 children, in Tigray,  
15 633 Northern Ethiopia. *Nutrition* 2015; 31(7-8), 964-970.  
16 634  
17 634 32. Mya KS, Kyaw AT, Tun T. Feeding practices and nutritional status of children age 6-  
18 635 23 months in Myanmar: A secondary analysis of the 2015-16 Demographic and  
19 636 Health Survey. *PloS one* 2019; 14(1), e0209044.  
20 637  
21 637 33. Bork KA, Diallo A. Boys are more stunted than girls from early infancy to 3 years of  
22 638 age in rural Senegal. *The Journal of Nutrition* 2017; 147(5), 940-947.  
23 639  
24 640 34. Tumilowicz A, Habicht JP, Pelto G, Pelletier DL. Gender perceptions predict sex  
25 641 differences in growth patterns of indigenous Guatemalan infants and young  
26 642 children. *The American Journal of Clinical Nutrition* 2015; 102(5), 1249-1258.  
27 643  
28 643 35. Mukabutera A, Thomson DR, Hedt-Gauthier BL, Basinga P, Nyirazinyoye L, Murray  
29 644 M. Risk factors associated with underweight status in children under five: an  
30 645 analysis of the 2010 Rwanda Demographic Health Survey (RDHS). *BMC Nutrition*  
31 646 2016; 2(1), 1-12.  
32 647  
33 647 36. Oyekale AS. Factors explaining acute malnutrition among under-five children in  
34 648 Sub-Sahara Africa (SSA). *Life Sci J* 2012; 9, 2101-7.  
35 649  
36 650 37. Keats A. Women's schooling, fertility, and child health outcomes: Evidence from  
37 651 Uganda's free primary education program. *Journal of Development Economics*  
38 652 2018; 135, 142-159.  
39 653  
40 653 38. Sunguya BF, Poudel KC, Mlunde LB, Urassa DP, Yasuoka J, Jimba M. Poor nutrition  
41 654 status and associated feeding practices among HIV-positive children in a food  
42 655 secure region in Tanzania: a call for tailored nutrition training. *PloS one* 2014; 9(5),  
43 656 e98308.  
44 657  
45 657 39. Iannotti LL, Duliencie SJL, Green J, Joseph S, François J, Antenor ML, ... Nickerson  
46 658 NM. Linear growth increased in young children in an urban slum of Haiti: a  
47 659 randomized controlled trial of a lipid-based nutrient supplement. *The American*  
48 660 *Journal of Clinical Nutrition* 2014; 99(1), 198-208.  
49 661  
50 661 40. Lopriore C, Muehlhoff E. Food security and nutrition trends in West Africa—  
51 662 Challenges and the way forward. In Proceedings of the 2nd International Workshop  
52 663 on Food-based Approaches for a Healthy Nutrition, Ouagadougou, Burkina. 2003;  
53 664 23–28.  
54 665  
55 665 41. Salami A, Kamara AB, Brixiova Z. Smallholder Agriculture in East Africa: Trends,  
56 666 Constraints and Opportunities; African Development Bank: Tunis, Tunisia, 2010.  
57 667  
58 667  
59 667  
60 667

1  
2  
3  
4  
5  
6  
7  
8  
9  
10  
11  
12  
13  
14  
15  
16  
17  
18  
19  
20  
21  
22  
23  
24  
25  
26  
27  
28  
29  
30  
31  
32  
33  
34  
35  
36  
37  
38  
39  
40  
41  
42  
43  
44  
45  
46  
47  
48  
49  
50  
51  
52  
53  
54  
55  
56  
57  
58  
59  
60

668 **Figure legends**

669 **Figure 1:** Percentage distribution of co-existed child malnutrition in the 31 study  
670 countries in SSA

671 **Figure 2:** Proportional circle map showing the percentage distribution of co-existed  
672 child malnutrition in study countries by regions of SSA

673

For peer review only

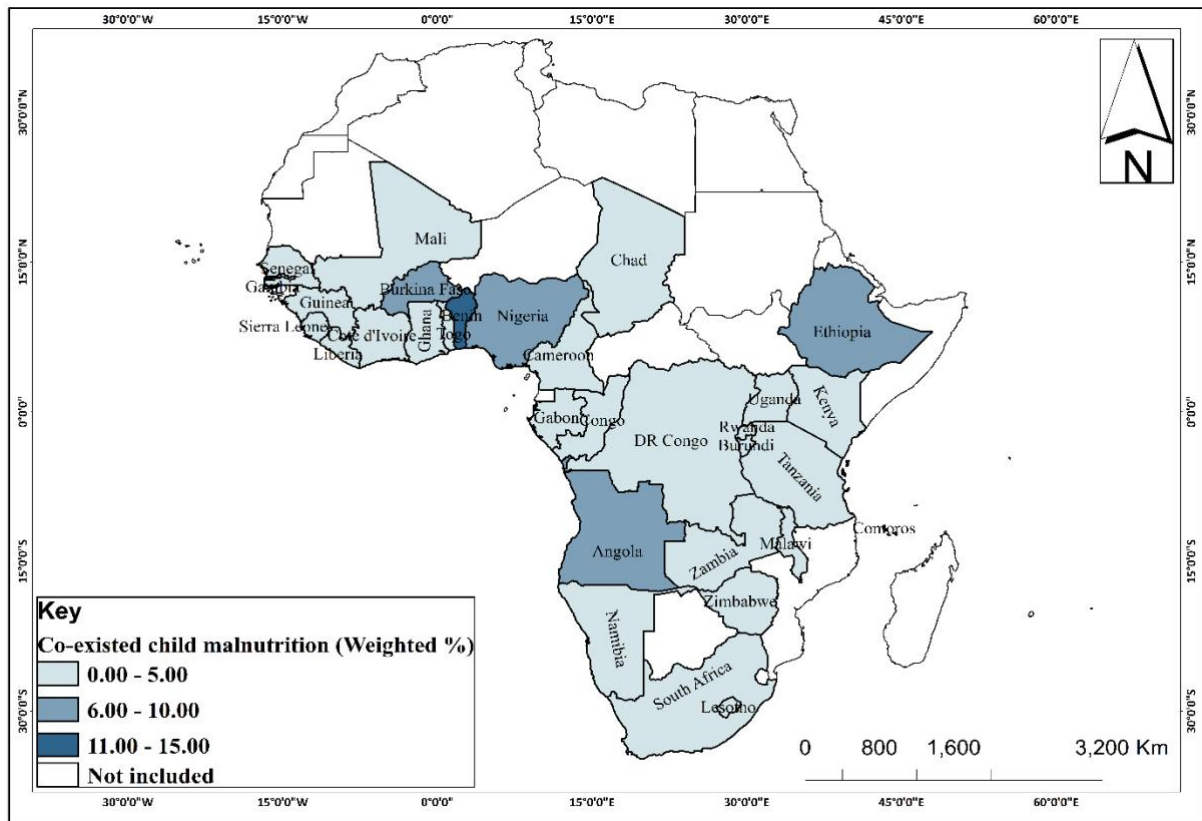

Figure 1: Percentage distribution of co-existed child malnutrition in the 31 study countries in SSA

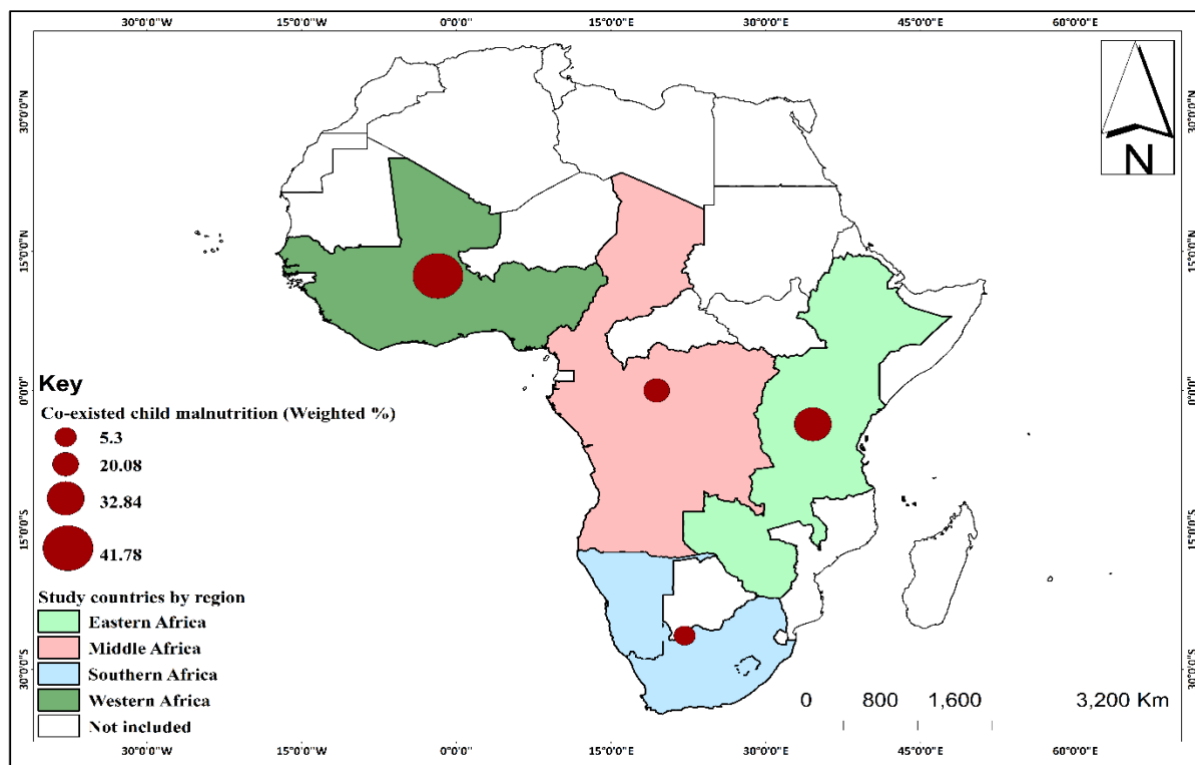

Figure 2: Proportional circle map showing the percentage distribution of co-existed child malnutrition in study countries by regions of SSA

# BMJ Open

## Socio-demographic and environmental risk factors accounting for the co-existence of stunting, underweight, and wasting in children under five: Analysis of cross-sectional surveys from 31 sub-Saharan African countries

|                                 |                                                                                                                                                                                                                                                                                                                                                                                                                                                                                                                                                                                                                                                                                                                                                                                                                                                                                                                                                                                                                                                                                                                                                                                                                                                                                                                                                                                                                                                                                                                                                                                                                                                                                                                                                                                                                                              |
|---------------------------------|----------------------------------------------------------------------------------------------------------------------------------------------------------------------------------------------------------------------------------------------------------------------------------------------------------------------------------------------------------------------------------------------------------------------------------------------------------------------------------------------------------------------------------------------------------------------------------------------------------------------------------------------------------------------------------------------------------------------------------------------------------------------------------------------------------------------------------------------------------------------------------------------------------------------------------------------------------------------------------------------------------------------------------------------------------------------------------------------------------------------------------------------------------------------------------------------------------------------------------------------------------------------------------------------------------------------------------------------------------------------------------------------------------------------------------------------------------------------------------------------------------------------------------------------------------------------------------------------------------------------------------------------------------------------------------------------------------------------------------------------------------------------------------------------------------------------------------------------|
| Journal:                        | <i>BMJ Open</i>                                                                                                                                                                                                                                                                                                                                                                                                                                                                                                                                                                                                                                                                                                                                                                                                                                                                                                                                                                                                                                                                                                                                                                                                                                                                                                                                                                                                                                                                                                                                                                                                                                                                                                                                                                                                                              |
| Manuscript ID                   | bmjopen-2021-052267.R1                                                                                                                                                                                                                                                                                                                                                                                                                                                                                                                                                                                                                                                                                                                                                                                                                                                                                                                                                                                                                                                                                                                                                                                                                                                                                                                                                                                                                                                                                                                                                                                                                                                                                                                                                                                                                       |
| Article Type:                   | Original research                                                                                                                                                                                                                                                                                                                                                                                                                                                                                                                                                                                                                                                                                                                                                                                                                                                                                                                                                                                                                                                                                                                                                                                                                                                                                                                                                                                                                                                                                                                                                                                                                                                                                                                                                                                                                            |
| Date Submitted by the Author:   | 28-Aug-2021                                                                                                                                                                                                                                                                                                                                                                                                                                                                                                                                                                                                                                                                                                                                                                                                                                                                                                                                                                                                                                                                                                                                                                                                                                                                                                                                                                                                                                                                                                                                                                                                                                                                                                                                                                                                                                  |
| Complete List of Authors:       | <p>Amadu, Iddrisu; University of Cape Coast, Africa Centre of Excellence in Coastal Resilience, University of Cape Coast, Cape Coast, Ghana;<br/> University of Cape Coast, Department of Fisheries and Aquatic Sciences, School of Biological Sciences, College of Agriculture and Natural Sciences, University of Cape Coast, Ghana</p> <p>Seidu, Abdul-Aziz; University of Cape Coast, Department of Population and Health; James Cook University, College of Public Health, Medical and Veterinary Sciences, James Cook University, Townsville, Queensland, Australia</p> <p>Duku, Eric; University of Cape Coast, Africa Centre of Excellence in Coastal Resilience, University of Cape Coast, Cape Coast, Ghana;<br/> University of Cape Coast, Department of Fisheries and Aquatic Sciences, School of Biological Sciences, College of Agriculture and Natural Sciences, University of Cape Coast, Ghana</p> <p>Boadu Frimpong, James; University of Cape Coast, Department of Health, Physical Education, and Recreation, University of Cape Coast, Cape Coast, Ghana</p> <p>Hagan Jnr., John; University of Cape Coast, Department of Health, Physical Education, and Recreation, University of Cape Coast, Cape Coast, Ghana</p> <p>Aboagye, Richard ; University of Health and Allied Sciences, School of Public Health, University of Health and Allied Sciences, Ho, Ghana</p> <p>Ampah, Belinda; Nursing and Midwifery Training College, Department of Academics, Nursing and Midwifery Training College, P.O.Box, 7, Esiama, Ghana</p> <p>Adu, Collins; Kwame Nkrumah University of Science and Technology, Department of Health Promotion and Disability Studies</p> <p>Ahinkorah, Bright; University of Technology Sydney, School of Public Health, Faculty of Health, University of Technology Sydney, NSW, Australia.</p> |
| <b>Primary Subject Heading</b>: | Public health                                                                                                                                                                                                                                                                                                                                                                                                                                                                                                                                                                                                                                                                                                                                                                                                                                                                                                                                                                                                                                                                                                                                                                                                                                                                                                                                                                                                                                                                                                                                                                                                                                                                                                                                                                                                                                |
| Secondary Subject Heading:      | Health services research, Health policy, Global health                                                                                                                                                                                                                                                                                                                                                                                                                                                                                                                                                                                                                                                                                                                                                                                                                                                                                                                                                                                                                                                                                                                                                                                                                                                                                                                                                                                                                                                                                                                                                                                                                                                                                                                                                                                       |
| Keywords:                       | Public health < INFECTIOUS DISEASES, Epidemiology < TROPICAL MEDICINE, Child protection < PAEDIATRICS                                                                                                                                                                                                                                                                                                                                                                                                                                                                                                                                                                                                                                                                                                                                                                                                                                                                                                                                                                                                                                                                                                                                                                                                                                                                                                                                                                                                                                                                                                                                                                                                                                                                                                                                        |



1  
2  
3  
4  
5  
6  
7  
8  
9  
10  
11  
12  
13  
14  
15  
16  
17  
18  
19  
20  
21  
22  
23  
24  
25  
26  
27  
28  
29  
30  
31  
32  
33  
34  
35  
36  
37  
38  
39  
40  
41  
42  
43  
44  
45  
46  
47  
48  
49  
50  
51  
52  
53  
54  
55  
56  
57  
58  
59  
60

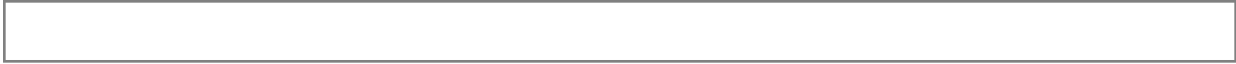

SCHOLARONE™  
Manuscripts



I, the Submitting Author has the right to grant and does grant on behalf of all authors of the Work (as defined in the below author licence), an exclusive licence and/or a non-exclusive licence for contributions from authors who are: i) UK Crown employees; ii) where BMJ has agreed a CC-BY licence shall apply, and/or iii) in accordance with the terms applicable for US Federal Government officers or employees acting as part of their official duties; on a worldwide, perpetual, irrevocable, royalty-free basis to BMJ Publishing Group Ltd ("BMJ") its licensees and where the relevant Journal is co-owned by BMJ to the co-owners of the Journal, to publish the Work in this journal and any other BMJ products and to exploit all rights, as set out in our [licence](#).

The Submitting Author accepts and understands that any supply made under these terms is made by BMJ to the Submitting Author unless you are acting as an employee on behalf of your employer or a postgraduate student of an affiliated institution which is paying any applicable article publishing charge ("APC") for Open Access articles. Where the Submitting Author wishes to make the Work available on an Open Access basis (and intends to pay the relevant APC), the terms of reuse of such Open Access shall be governed by a Creative Commons licence – details of these licences and which [Creative Commons](#) licence will apply to this Work are set out in our licence referred to above.

Other than as permitted in any relevant BMJ Author's Self Archiving Policies, I confirm this Work has not been accepted for publication elsewhere, is not being considered for publication elsewhere and does not duplicate material already published. I confirm all authors consent to publication of this Work and authorise the granting of this licence.

1  
2  
3 1 **Socio-demographic and environmental risk factors accounting for the co-existence of**  
4 **stunting, underweight, and wasting in children under five: Analysis of cross-sectional**  
5 **surveys from 31 sub-Saharan African countries**  
6

7 4 Iddrisu Amadu<sup>1,2</sup>, Abdul-Aziz Seidu<sup>3,4,5</sup>, Eric Duku<sup>1,2</sup>, James Boadu Frimpong<sup>6</sup>, John Elvis  
8 Hagan Jr<sup>6,7</sup>, Richard Gyan Aboagye<sup>8</sup>, Belinda Ampah<sup>9</sup>, Collins Adu<sup>10</sup>, Bright Opoku  
9 Ahinkorah<sup>11</sup>  
10  
11 7

- 12  
13 8 1. Africa Centre of Excellence in Coastal Resilience, University of Cape Coast, Cape  
14 9 Coast, Ghana  
15 10 2. Department of Fisheries and Aquatic Sciences, School of Biological Sciences,  
16 11 College of Agriculture and Natural Sciences, University of Cape Coast, Ghana  
17 12 3. Department of Population and Health, College of Humanities and Legal Studies,  
18 13 University of Cape Coast, Ghana.  
19 14 4. College of Public Health, Medical and Veterinary Sciences, James Cook University,  
20 15 Townsville, Queensland, Australia  
21 16 5. Department of Estate Management, Takoradi Technical University, Takoradi,  
22 17 Ghana  
23 18 6. Department of Health, Physical Education, and Recreation, University of Cape  
24 19 Coast, Cape Coast, Ghana  
25 20 7. Neurocognition and Action-Biomechanics-Research Group, Faculty of Psychology  
26 21 and Sport Sciences, Bielefeld University, Bielefeld-Germany  
27 22 8. School of Public Health, University of Health and Allied Sciences, Ho, Ghana  
28 23 9. Department of Academics, Nursing and Midwifery Training College, P.O.Box, 7,  
29 24 Esiama, Ghana  
30 25 10. Department of Health Promotion, Education and Disability Studies, Kwame  
31 26 Nkrumah University of Science and Technology, Kumasi, Ghana  
32 27 11. School of Public Health, Faculty of Health, University of Technology Sydney, NSW,  
33 28 Australia.

34  
35  
36  
37  
38  
39 29 **Email addresses**

40  
41 30 IA: iddrisu.amadu@stu.ucc.edu.gh  
42 31 \*AS: abdul-aziz.seidu@stu.ucc.edu.gh  
43 32 ED: eric.duku@stu.ucc.edu.gh  
44 33 JBF: frimpongboadujames@gmail.com  
45 34 JEH: elvis.hagan@ucc.edu.gh  
46 35 RGA: raboagye18@sph.uhas.edu.gh  
47 36 BA: [oyebel@gmail.com](mailto:oyebel@gmail.com)  
48 37 CA: collinsadu80@yahoo.com  
49 38 BOA: brightahinkorah@gmail.com  
50  
51  
52  
53

54 40 **Correspondence to:**

55  
56 41 Abdul-Aziz Seidu, Department of Population and Health, University of Cape Coast, PMB TF0494,  
57 42 Cape Coast, Ghana, Email:abdul-aziz.seidu@stu.ucc.edu.gh  
58  
59  
60

1  
2  
3 444 45 **ABSTRACT**

7 46 **Objective:** This study investigated the socio-demographic and environmental risk factors  
8 47 of the co-existence of stunting, underweight, and wasting among children under age five  
9 48 in sub-Saharan Africa.

11 49 **Methods:** Data from 31 sub-Saharan African countries were pooled from the Demographic  
12 50 and Health Surveys (DHS) collected between 2010 and 2019. We examined the risk of co-  
13 51 existence of undernutrition using multinomial logistic regression models, with results  
14 52 presented as relative risk ratios (RRR) with their respective confidence intervals.

17 53 **Outcome measures:** The outcome variables were three child anthropometrics: stunting  
18 54 (height-for-age z-scores); underweight (weight-for-age z-scores); and wasting (weight-  
19 55 for-height z-scores).

21 56 **Results:** The prevalence of co-existence of stunting, underweight, and wasting varied  
22 57 across countries and sub-regions, with the highest and lowest prevalence of co-existence  
23 58 of stunting, underweight, and wasting as Benin (12.14%) and Gambia (0.58%) respectively.  
24 59 The risk of co-existence of the three undernutrition dimensions was higher among children  
25 60 age 1 year compared to those aged 0. Children who were females were less likely to have  
26 61 a co-existence of the three dimensions of undernutrition compared to their male  
27 62 counterparts. The risk of co-existence of the three dimensions was higher among children  
28 63 with small size at birth, those whose mothers had no education, not working, had no  
29 64 antenatal visits during pregnancy, children delivered at home, those whose mothers were  
30 65 poor had no access to media, and children whose mothers had unimproved toilet facility.

34 66 **Conclusion:** Findings suggest context nutrition-specific interventions such as  
35 67 complementary feeding, dietary supplementation and increasing dietary diversity to  
36 68 promote children feeding practices in the studied countries are warranted. Planned  
37 69 interventions should prioritize all the identified factors noted in the current study to help  
38 70 reduce the risks of co-existence of stunting, underweight, and wasting among children  
39 71 under age 5.

42 72 **Keywords:** co-existence; stunting; underweight; wasting; children under five; sub-Saharan  
43 73 Africa

74

**Strength and Limitations**

- The use of nationally representative data ensures that our findings are generalizable and replicable in the 31 SSA countries included in this study.
- Findings contribute to bridging the gaps identified in the current research on CNS by including multiple indicators (stunting, underweight, and wasting) in the concurrent measurement of our outcome variable, compared to the unitary assessment on undernutrition that currently dominates literature.
- The study relied on secondary data, the analysis was limited to only variables that were in the dataset. Hence, interpretations and inferences made from current findings must be limited to only these observed variables.
- Also, the DHS employs cross-sectional designs which restrict causality on the noted outcomes.
- The key variables were self-reported by the mothers, and therefore, there is the likelihood of recall bias and other social desirability concerns in the present study.

75

76

77

78

79

80

81

## 82 BACKGROUND

83 Undernutrition among children under 5 years remains a major public health problem  
84 across many developing countries<sup>1,3</sup>. Factors such as insufficient food intake, diarrhoea,  
85 recurring infections, poor sanitation practices, and low parental education have been  
86 identified as significant contributors to the high prevalence of undernutrition during  
87 childhood<sup>1,4,5</sup>. Despite the numerous interventions rolled out to address childhood  
88 undernutrition especially in sub-Saharan Africa where the phenomenon is quite pervasive,  
89 the progress seems to be insignificant<sup>6,7</sup>. For example, a study reported that child  
90 undernutrition accounted for nearly half (45%) of the child mortality rate in developing  
91 countries<sup>8</sup>. Aside from that, it was reported in 2018 that about 149 million and 49 million  
92 children under age 5 were stunted and wasted respectively<sup>9</sup>.

93 Three main indicators that are often used to represent undernutrition are underweight or  
94 low weight for age, stunting or low height for age, and wasting or low weight for height<sup>2,10-</sup>  
95 <sup>12</sup>. Among the three indicators of undernutrition, stunting has been identified as the  
96 problem with the greatest magnitude among under 5 children in developing countries<sup>2,3</sup>.  
97 Even though the prevalence of stunting in sub-Saharan Africa is declining, it is worth noting  
98 that it is still above 30%<sup>13</sup> which is undeniably high. Research also indicates that the country-  
99 specific prevalence of stunting, underweight and wasting is still high<sup>2,3</sup>. For instance, in  
100 Ethiopia, the prevalence of wasting and stunting were 10% and 38% respectively<sup>14</sup>.  
101 Additionally, the prevalence of stunting, underweight and wasting among children in  
102 South Africa were 35.8%, 20.5%, and 17.2%<sup>3</sup>. Likewise, Anin et al.<sup>2</sup> reported 33.2%, 14.1%, 27%  
103 and 2.6% of prevalence in stunting, wasting, underweight and overweight among infants  
104 (6-23 months) across Northern Ghana.

105 Previous studies have investigated the socio-demographic and environmental risk factors  
106 associated with either stunting, underweight or wasting among children under 5 years and  
107 found the age of a child, sex of the child, child's size at birth, mother's age during  
108 childbirth, mother's educational level, birth order, place of residence and mother's body  
109 mass index (BMI) as associated factors<sup>1-3,15,16</sup>. Other studies also found a significant linkage  
110 between household wealth quintile and maternal short stature, and nutritional status of  
111 children under 5<sup>17,18</sup>. Regarding the sex of a child, for example, female children were found  
112 to be less likely to suffer from stunting compared to males<sup>1,3</sup>.

113 Apart from studies that have examined the factors associated with either stunting,  
114 underweight, and wasting, some scholars have begun looking at predictors of the co-  
115 existence of any two or three of the indicators of malnutrition. A study in 84 countries that  
116 examined the prevalence and predictors of co-existence of stunting and wasting found  
117 sex and age of children as significant predictors<sup>19</sup>. Other studies in Ghana<sup>20</sup> and India<sup>21</sup> also  
118 examined the co-existence of stunting, underweight, and wasting and found birth interval,  
119 birth weight, dietary diversity, place of delivery, wealth index, mother's BMI, mother's  
120 educational level, and partners' educational level as associated factors. The need to  
121 examine the co-existence of stunting, underweight and wasting is important because not  
122 much work has been done on that subject and hence children who concurrently suffer  
123 from stunting, underweight, and wasting are less likely to be reached in malnutrition  
124 prevention programmes, especially in SSA. For instance, some scholars have indicated that  
125 despite evidence that wasting and stunting are global public health problems that  
126 frequently co-exist, they are usually separated in terms of policy, guidance, programming

1  
2  
3 127 and financing<sup>22</sup>. This creates a gap in literature that needs to be filled. Despite the  
4 128 detrimental consequences of undernutrition on the health and wellbeing of children under  
5 129 5 in SSA, few studies have utilised current nationally representative data from a larger  
6 130 sample to investigate the socio-demographic and environmental risk factors associated  
7 131 with the co-existence of stunting, underweight, and wasting among this age group.  
8 132 Studies presenting empirical analyses of the co-existence of these three indicators of child  
9 133 undernutrition in SSA are absent in extant literature making it difficult for policymakers and  
10 134 nutritional experts to provide up-to-date trends with appropriate strategies to curb the  
11 135 situation in the sub-region. This research lag presents a void in extant literature which this  
12 136 study seeks to bridge. Therefore, the study investigated the socio-demographic and  
13 137 environmental risk factors of the co-existence of stunting, underweight, and wasting  
14 138 among children under age 5 in sub-Saharan Africa using data from the Demographic Health  
15 139 Survey (DHS) conducted in 31 countries between 2010 and 2019. The findings of the study  
16 140 could contribute to the formulation of policies and interventions to respond to the  
17 141 nutritional needs of children under 5 years and also suggest pragmatic ways of reducing  
18 142 undernutrition among children in the sub-region.  
19  
20  
21  
22

23 143

## 24 144 **METHODS**

### 25 145 **Data Source**

26  
27  
28  
29 146 The dataset included 127,487 children under the age of 5 years from 31 sub-Saharan African  
30 147 countries (Figure 1) were pooled from the most current Demographic and Health Surveys  
31 148 (DHS) conducted between 2010 and 2019 (Appendix 1). Specifically, the data were pooled  
32 149 from the children's files in each of the countries. The DHS Program has conducted over  
33 150 400 surveys in over 90 developing countries around the world since 1984 every five years<sup>23</sup>.  
34 151 The program implements cross-sectional surveys to gather nationally-representative data,  
35 152 analyze and disseminate accurate information on important demographic and health  
36 153 indicators spanning population, nutrition, and diseases. For all surveys, standardized  
37 154 protocols designed for each target group including children, women, and men at the  
38 155 household level are employed to allow for cross-national comparisons. Stratified two-  
39 156 stage sampling involving first, the listing of enumeration areas and selection of clusters,  
40 157 and then a random selection of households in each cluster. The detailed sampling method  
41 158 can be found in a previous study<sup>24</sup>. The dataset is freely available for download at:  
42 159 <https://dhsprogram.com/data/available-datasets.cfm>. The Strengthening Reporting of  
43 160 Observational Studies in Epidemiology (STROBE) guidelines were followed in writing the  
44 161 manuscript<sup>25</sup>.

### 45 162 **Study Variables**

#### 46 163 **Outcome Variable**

47  
48  
49  
50  
51 164 The outcome variable considered in this study is derived from three child anthropometric  
52 165 variables including stunting (height-for-age z-scores); underweight (weight-for-age z-  
53 166 scores) and wasting (weight-for-height z-scores). The DHS (2021) specifies categorization  
54 167 for each of these variables following the WHO child growth standard. Each of the three  
55 168 variables we coded into "0" for "Normal" and "1" for "Stunting", "underweight" and  
56 169 "Wasting" respectively.  
57  
58  
59  
60

1  
2  
3 170 These three variables were then added to generate the outcome variable “Co-existed  
4 171 undernutrition” with scores (discrete) ranging from 0 to 4 where 0 implies “Normal”, that  
5 172 is, children with none of the three conditions; 1 implies “Single burden”, that is, the child  
6 173 suffers from one of the three conditions; 2 indicates that child suffers from “Two burdens”  
7 174 out of the three; and 3 shows “Co-existed”, that is, the child suffers from all three  
8 175 conditions of undernutrition. For parsimony, children who suffered from “Single burden”  
9 176 and those who suffered from “Two burdens” were added resulting in the variable “Co-  
10 177 existed undernutrition” with three response categories: 0=Normal; 1=One or two burdens;  
11 178 and 3=co-existed.

## 15 179 **Independent Variables**

16  
17 180 Several risk factors spanning socio-demographic and environmental factors have been  
18 181 associated with child undernutrition. The relevant biosocial characteristics and  
19 182 sociocultural factors related to the child, mother, household head and the household  
20 183 together form compositional factors<sup>26,27</sup>. Factors that describe location or “place-based”  
21 184 variables are contextual factors<sup>20,26,28,29</sup>. In this study, contextual and composition factors  
22 185 except household-level characteristics related to environment and sanitation are  
23 186 categorized as “Socio-demographic risk factors”. Socio-cultural household characteristics  
24 187 related to environment and sanitation are categorized as “Environmental risk factors”.

## 27 188 **Socio-Demographic Risk Factors**

28  
29 189 The relevant variables under socio-demographic risk factors considered include the age of  
30 190 the child; sex of child; birth order of child ; perceived size at birth; mother’s age;  
31 191 educational attainment; working status; antenatal visits during pregnancy; postnatal  
32 192 check within 2 months; and place of delivery. At the household level, relevant variables  
33 193 included are the wealth status; the age of household head ; sex of household head (male  
34 194 and female); access to electricity ; and access to media which was derived from the three  
35 195 variables “access to television”, “radio” and “newspaper”. The contextual factors  
36 196 considered are Urbanicity and the country of origin of the participant.

## 39 197 **Environmental Risk Factors**

40  
41 198 We considered the following variables: type of toilet facility (re-coded into “improved”  
42 199 and unimproved”<sup>28</sup>; source of drinking water (re-coded as “improved” and  
43 200 “unimproved”<sup>28</sup>; and type of household cooking fuel (re-coded into “clean” and “unclean”  
44 201 <sup>28,30</sup>under the category “environmental risk factors”

## 47 202 **Data Analyses**

48  
49 203 The statistical analysis of the data was performed using the Stata SE software version 14.2.  
50 204 The “svyset” command was first used to declare the data as survey data to prevent the  
51 205 potential effects of the complex sampling techniques on the analyses. To understand the  
52 206 distributions of the variables, the data were summarized and presented in tables using  
53 207 descriptive statistics (frequencies, weighted percentages, and 95% confidence intervals  
54 208 (CIs) of percentages). We further integrated the data into a GIS environment and  
55 209 presented the distribution of key variables across the study countries and geographic  
56 210 regions in map images (Figure 1 and Figure 2). This approach enhances the visualization of  
57 211 the data and understanding of the context of the study. The associations between the co-  
58 212 existence of undernutrition and each of the risk factors considered were assessed using



the chi-square test of independence, with results presented in a contingency table. The risk factors as independent variables were then subjected to collinearity diagnosis tests, including Variance Inflation Factors (VIF), Square VIF, Tolerance, and R-squared (See Appendix 2). To determine the socio-demographic and environmental risk factors associated with the co-existence of undernutrition, a multinomial regression model was implemented. The sample weight variable was used to adjust for potential over-and under-sampling. All statistical tests were conducted at  $p < 0.05$ .

### **Ethical Approval**

DHS reports ethical clearance is provided by the Ethics Committee of ORC Macro Inc. as well as Ethics Boards of partner institutions (e.g., Ministries of Health) from studied countries. The DHS procedures require that principles for the protection of respondents' anonymity and confidentiality adhere. Inner City Fund International also guarantees that the survey protocols meet the United States Department of Health and Human Services' regulations for the respect of human subjects. The current study used secondary data, hence, no further ethical approval was sought. The datasets are freely available for download and usage at <https://dhsprogram.com/data/available-datasets.cfm>.

\*\*\*Table 1\*\*\*

\*\*\*Figure 1\*\*\*

\*\*\*Figure 2\*\*\*

### **Patient and public involvement**

Patients and the public were not involved in the design and conduct of this research

### **Results**

#### ***Descriptive Analysis on the Prevalence of Co-existence of Stunting, Underweight, and wasting varied across Countries and Sub-Regions***

Table 1 shows the description of the sample in the study across the independent variables. Appendix 2 shows the distribution of sample by country. The prevalence of co-existence of stunting, underweight, and underweight varied across countries and sub-regions, with the highest and lowest prevalence of co-existence of stunting, underweight, and wasting as Rwanda (6.17%) and South Africa (0.18%) respectively (Figure 1). In terms of sub-region, the highest prevalence of co-existence of stunting, underweight, and wasting was observed in Western Africa (3.11%) and the lowest prevalence in Southern Africa (0.88%) (Figure 2). Significant associations between all the independent variables and co-existence of stunting, wasting, and underweight, except maternal age and age of household head, were identified (Table 2).

\*\*\*Table 2\*\*\*

#### ***Multinomial Logistic Regression Results of Risk Factors for Co-existence of One and a Co-Existence of Two Dimensions of Undernutrition***

Table 3 shows the results of the multinomial regression analysis of the risk factors of co-existence of dimensions of undernutrition (stunting, underweight, and wasting) among children under five years in the SSA. Age of child, size of the child at birth, sex of the child,

1  
2  
3 255 birth order, educational level, maternal age, ANC attendance, place of delivery, source of  
4 256 drinking water, sex of household head, wealth index, access to electricity and place of  
5 257 residence were associated with one or two dimensions of undernutrition. See Appendix 3  
6 258 for country-level risk of co-existence of stunting, wasting, and underweight.  
7  
8  
9 259

### 260 **Co-existence of Three Dimensions of Undernutrition**

261 Regarding the co-existence of the three dimensions of undernutrition (stunting,  
262 underweight, and wasting), age of the child, sex of the child, perceived size of birth size,  
263 maternal educational attainment, working status, antenatal visits during pregnancy, place  
264 of delivery, wealth status, access to media, and type of toilet facility were found to be  
265 significant risk factors (Table 3).

### 266 **\*\*\*Table 3\*\*\***

## 267 **DISCUSSION**

268 The study investigated the socio-demographic and environmental risk factors of the co-  
269 existence of stunting, underweight, and wasting among children under age 5 in sub-  
270 Saharan Africa using data from DHS conducted in 31 countries between 2010 and 2019. The  
271 study found that the countries with the highest and lowest prevalence of co-existence of  
272 stunting, underweight, and wasting were Benin and Gambia respectively. In terms of  
273 geographic region, the highest prevalence of co-existence of stunting, underweight, and  
274 wasting was observed in Western Africa and the lowest prevalence in Southern Africa.  
275 The disparities in the prevalence among the countries and geographical regions could be  
276 attributed to the nutritional practices and beliefs practised in the countries and  
277 geographical regions. Differences in the health policies provided by governments in the  
278 various countries could also account for the disparities noted. This finding implies that  
279 countries that have high prevalence should take critical lessons from the countries that are  
280 doing well regarding the implementation of nutritional policies and interventions (e.g.,  
281 increasing dietary supplementation, increasing dietary diversity) that target the reduction  
282 of the co-existence of stunting, underweight, and wasting among children under age 5 in  
283 sub-Saharan Africa<sup>2</sup>.

284 Similar to previous studies<sup>1,3</sup>, this study found that children aged 1 year, 2 years, and 3 years  
285 were at greater risk of having co-existence of all the three forms of undernutrition  
286 compared to those aged 0. A plausible reason for this finding could be that as children  
287 grow their energy needs also increase<sup>1</sup>, increasing their risk of having all three nutritional  
288 conditions. Alternatively, since these nutritional conditions may manifest after long  
289 durations of improper nutritional practices or undernutrition<sup>1,3</sup>, older children may be at  
290 higher risk of having all three nutritional conditions. The finding suggests that  
291 complementary foods given to children as they grow are inadequate. To reduce the risk of  
292 co-existence of stunting, underweight, and wasting among under 5 children, the health  
293 sectors in the various countries should invest heavily in providing adequate  
294 complementary feeding to this category of children.

295 Corroborating the findings of other studies<sup>1,3,31,32</sup>, this study also found that children who  
296 were females were less likely to have a co-existence of the three dimensions of  
297 undernutrition compared to their male counterparts. An acceptable explanation for this

1  
2  
3 298 finding could be the biological variations in morbidity between males and females at that  
4 299 young age<sup>3</sup>. It is also possible that since male children have higher birth weight compared  
5 300 to females, they require more energy<sup>1,33</sup>, which increases the risk of males having all three  
6 301 nutritional conditions. Moreover, male children are perceived to be hungrier than females,  
7 302 therefore breastfeeding alone could be insufficient or inadequate<sup>3,34</sup>, increasing their  
8 303 susceptibility to having the three nutritional conditions. The finding suggests that male  
9 304 children should be given critical attention in the development and implementation of  
10 305 nutritional programs (e.g., dietary supplementation) to mitigate the co-existence of  
11 306 stunting, underweight, and wasting among these male children under 5.

12  
13  
14  
15 307 The study found that the risk of co-existence of the three dimensions of undernutrition  
16 308 was higher among children with the average size at birth and small size at birth compared  
17 309 to children with large size at birth. It has been proven that undernutrition in children is  
18 310 partly influenced by maternal nutrition practices. Hence, mothers' appropriate nutritional  
19 311 behaviours during the prenatal and postnatal period is key to improve child growth.  
20 312 Conversely, maternal undernutrition causes low maternal BMI, which in turn affects the  
21 313 foetus to poor development often associated with a small birth size and low birth  
22 314 weight<sup>1,3,21,35</sup>. This finding indicates that mothers of children under 5 should continuously  
23 315 be educated on the best nutritional practices such as exclusive breastfeeding,  
24 316 complementary feeding, and dietary supplementation. These strategies will help  
25 317 ameliorate the risk of acquiring health conditions associated with undernutrition among  
26 318 children under 5.

27  
28  
29  
30 319 The risk of co-existence of the three dimensions was higher among children whose  
31 320 mothers had no education and primary education compared to those whose mothers had  
32 321 higher education. Mothers who have attained higher education are better informed about  
33 322 improved childcare practices<sup>36</sup>, are more empowered to make health decisions<sup>37</sup>, practice  
34 323 good personal hygiene<sup>37</sup>, are more likely to use the health facility<sup>38</sup>, proper feeding  
35 324 practices<sup>35</sup> and childcare in times of illness<sup>35,39</sup>. This finding suggests that mothers with  
36 325 no formal or little education are neglected in nutritional programs that help to eliminate  
37 326 stunting, underweight, and wasting. Hence, they should be given the needed  
38 327 consideration to deal with this persistent health issue.

39  
40  
41  
42 328 This study also found that the risk of co-existence of the three dimensions was higher  
43 329 among children whose mothers were not working compared to those whose mothers  
44 330 were working. Women's employment status indicates their ability to afford proper  
45 331 nutritional products and health care services<sup>35,39</sup>. Therefore, if mothers are not employed,  
46 332 the children become highly susceptible or vulnerable because mothers are unlikely to meet  
47 333 their nutritional needs or requirements. Mothers with children under 5 with such  
48 334 disadvantaged backgrounds should be given subsidies on children's nutritional products  
49 335 and perhaps, free access to health care services by governmental and non-governmental  
50 336 organizations. This step will be significant in reducing the risks of the co-existence of  
51 337 stunting, underweight, and wasting among children under 5.

52  
53  
54  
55 338 The risk of co-existence of the three dimensions was higher among children whose  
56 339 mothers had no antenatal visits during pregnancy compared to those whose mothers had  
57 340 antenatal visits during pregnancy. Specifically, mothers who attend antenatal services are  
58 341 usually educated on the best practices of nutrition and general healthcare, which hitherto  
59 342 would not be known by these mothers<sup>37</sup>. Therefore, mothers who did not have antenatal

1  
2  
3 343 visits may lack some knowledge about proper nutritional practices, increasing their  
4 344 children's risk of having these undernutrition-related challenges. Regular antenatal visits  
5 345 could reduce children's risk of stunting, underweight, and wasting, therefore, mothers  
6 346 should continuously be encouraged to go for antenatal care services in their countries.

7  
8  
9 347 Children who were delivered at home compared to children who were delivered at a health  
10 348 facility were found to have a higher risk of co-existence of the three dimensions. Since  
11 349 mothers who deliver at home do not receive any expert nutritional advice from a qualified  
12 350 health practitioner<sup>36</sup>, the children of such mothers are at higher risk of having these  
13 351 conditions because of poor and/ or inadequate dietary practices. This finding shows that  
14 352 facility delivery may help reduce the risk of co-existence of stunting, underweight, and  
15 353 wasting among children under 5. Therefore, mothers should regularly be educated on the  
16 354 need to opt for facility delivery because of its positive implications on children's growth.

17  
18  
19 355 The risk of co-existence of the three dimensions was higher among children whose  
20 356 mothers were poor and had middle wealth status compared to those whose mothers were  
21 357 rich. Usually, mothers who have an average income may lack the financial capacity to feed  
22 358 themselves and their children properly and adequately<sup>3,17,35</sup>, increasing the children's risk  
23 359 of being stunted, underweight or wasted. Likewise, mothers from poor and middle wealth  
24 360 quintiles may not have access to quality nutritional products and health care systems<sup>35,39</sup>,  
25 361 making their children more susceptible to having all three nutritional conditions. This  
26 362 finding implies that women from poor economic backgrounds should be assisted with  
27 363 nutritional products and services to facilitate the reduction in the risks of the co-existence  
28 364 of stunting, underweight, and wasting among children under 5.

29  
30  
31  
32 365 The risk of co-existence of the three dimensions was higher among children whose  
33 366 mothers had no access to media compared to those whose mothers had access to media.  
34 367 Since many people are educated about proper nutritional practices through the mass  
35 368 media<sup>10,11</sup>, mothers who have no access to the media may lack certain important nutritional  
36 369 information they need. This information gap could increase children's risk of having all  
37 370 three nutritional conditions through improper dietary practices from their mothers. For  
38 371 instance, mothers' access to appropriate information from the media would help them  
39 372 decide on which proper diets or food commodities are readily available on market for their  
40 373 children. More pragmatic ways of reaching mothers who have no access to media are  
41 374 encouraged. Regular outreach or sensitization programs to target women without access  
42 375 to media for example could help in reducing the risks of the co-existence of stunting,  
43 376 underweight, and wasting among children under 5.

44  
45  
46  
47 377 Children whose mothers had unimproved toilet facilities were found to have a higher risk  
48 378 of co-existence of the three dimensions of child undernutrition compared to those whose  
49 379 mothers had improved toilet facilities. Insanitary or unhygienic toilet conditions may  
50 380 increase mother-child-environment interactions that may result in increased exposure to  
51 381 childhood diseases and other opportunistic infections (e.g., diarrhoeal episodes, fever)  
52 382 either through consumption of contaminated foods, drinking water or poor  
53 383 environmental sanitation<sup>21</sup>. These conditions have been shown to cause growth  
54 384 retardation in children. Governmental and non-governmental organizations should  
55 385 support the provision of improved household toilet facilities for poorer communities to  
56 386 help minimize the risks of the co-existence of child undernutrition indicators.

1  
2  
3 387 Children from Burkina Faso, Burundi, Chad, Nigeria, and Rwanda had a higher risk of having  
4 388 the co-existence of the three dimensions compared to those from Angola. On the other  
5 389 hand, countries such as Benin, Cameroon, Congo, Gabon, Ghana, Guinea, Kenya, Lesotho,  
6 390 Malawi, Senegal, Zambia, Uganda, Tanzania, Sierra Leone, Zimbabwe, and South Africa  
7 391 had a lower risk among their children having co-existence of the three undernutrition  
8 392 dimensions. The sub-regional and country-specific variations in socio-economic, agro-  
9 393 ecological and geographical characteristics may strongly influence the nutritional status of  
10 394 children because of inadequate food supplies, limited access to arable land for agriculture,  
11 395 unfavourable climatic conditions (e.g., desertification), rapid population growth, and  
12 396 increasing cost of living may determine food access, availability and production in studied  
13 397 countries in SSA<sup>40,41</sup>. Governmental priorities should intensify efforts to minimize the risk  
14 398 of co-existence of stunting, underweight, and wasting among children under age 5 with  
15 399 sound socio-economic and sustainable human capital development.

## 400 **Conclusions**

401 The study investigated the socio-demographic and environmental risk factors of the co-  
402 existence of stunting, underweight, and wasting among children under age 5 in sub-  
403 Saharan Africa using data from DHS conducted in 31 countries between 2010 and 2019. The  
404 study found that the prevalence of co-existence of stunting, underweight, and  
405 wasting ranged from 0.58 % in the Gambia to 12.14% in Benin. The study also found that the  
406 prevalence of co-existence of stunting, underweight, and wasting was high in Western  
407 Africa (41.78%) but low in Southern Africa (5.3%). The significant findings show that the  
408 disadvantaged have more risks of the co-existence of stunting, underweight, and wasting  
409 among under 5 children in selected SSA countries. Findings require context nutrition-  
410 specific interventions such as complementary feeding, dietary supplementation and  
411 increasing dietary diversity to promote children feeding practices across the studied  
412 countries. Besides, country-specific sustainable human capital developmental agenda  
413 (e.g., empowerment initiatives, entrepreneurial training), especially among mothers are  
414 required to help improve children's dietary intake by governments and partnering  
415 institutions or agencies.

416 **Acknowledgements:** The authors thank the MEASURE DHS project for their support and  
417 free access to the original data

418 **Contributors:** IA and BOA developed the study concept. IA performed the data analysis.  
419 AS, ED, JBF, JEH, RGA, BA, CA and BOA drafted and revised the manuscript critically for its  
420 intellectual content. All authors read and approved the final manuscript. AS had the final  
421 responsibility to submit the manuscript.

422  
423 **Funding:** This research received no specific grant from any funding agency in the public,  
424 commercial or not-for-profit sectors

425  
426  
427 **Competing interests:** None

428  
429 **Patient consent for publication:** No consent to publish was needed for this study  
430 as we did not use any details, images or videos related to individual participants. In

431 addition, data used are available in the public domain.

432

### 433 **Ethics Approval and consent to participate**

434 DHS reports ethical clearance are provided by the Ethics Committee of ORC Macro Inc. as  
 435 well as Ethics Boards of partner institutions (e.g., Ministries of Health) from studied  
 436 countries. The DHS procedures require that principles for the protection of respondents'  
 437 anonymity and confidentiality are adhered. Inner City Fund International also guarantees  
 438 that the survey protocols meet the United States Department of Health and Human  
 439 Services' regulations for the respect of human subjects. The current study used a  
 440 secondary data, hence, no further ethical approval was sought. The datasets are freely  
 441 available for download and usage at <https://dhsprogram.com/data/available-datasets.cfm>.

442

443 **Provenance and peer review: Not commissioned; externally peer reviewed.**

444

445 **Data availability statement:** Data are available in a public, open access  
 446 repository. Data for this study were sourced from Demographic and Health surveys  
 447 (DHS) and available here: <http://dhsprogram.com/data/available-datasets.cfm>

448

449

### 450 **References**

- 451 1. Amare ZY, Ahmed ME, Mehari AB. Determinants of nutritional status among  
 452 children under age 5 in Ethiopia: further analysis of the 2016 Ethiopia demographic  
 453 and health survey. *Global Health* 2019;15(1):1–11.
- 454 2. Anin SK, Saaka M, Fischer F, Kraemer A. Association between Infant and Young  
 455 Child Feeding (IYCF) Indicators and the Nutritional Status of Children (6–23  
 456 Months) in Northern Ghana. *Nutrients* 2020; 12, 2565.  
 457 <https://doi.org/10.3390/nu12092565>
- 458 3. Madiba S, Chelule PK, Mokgatle MM. Attending informal preschools and daycare  
 459 centers is a risk factor for underweight, stunting and wasting in children under the  
 460 age of five years in underprivileged communities in South Africa. *International  
 461 Journal of Environmental Research and Public Health* 2019; 16(14), 2589.
- 462 4. Yalew BM, Amsalu F, Bikes D. Prevalence and factors associated with stunting,  
 463 underweight and wasting: a community based cross sectional study among  
 464 children age 6-59 months at Lalibela Town, Northern Ethiopia. *J Nutr Disorders Ther*  
 465 2014; 4(147), 2161-0509.
- 466 5. WHO. Nutrition Landscape Information System (NLIS) Country Profile Indicators:  
 467 Interpretation Guide; World Health Organization: Geneva, Switzerland, 2010.
- 468 6. Akombi BJ, Agho KE, Hall JJ, Wali N, Renzaho A, Merom D. Stunting, wasting and  
 469 underweight in sub-Saharan Africa: a systematic review. *International Journal of  
 470 Environmental Research and Public Health* 2017; 14(8), 863.
- 471 7. WHO. Global nutrition targets 2025: policy brief series (WHO/NMH/NHD/14.2).  
 472 Geneva: World Health Organization; 2014.  
 473 [https://apps.who.int/iris/bitstream/handle/10665/149018/WHO\\_NMH\\_NHD\\_14.2\\_e  
 474 ng.pdf](https://apps.who.int/iris/bitstream/handle/10665/149018/WHO_NMH_NHD_14.2_eng.pdf)
- 475 8. Black RE, Victora CG, Walker SP, Bhutta ZA, Christian P, De Onis M, Ezzati M,  
 476 Grantham-McGregor S, Katz J, Martorell R, Uauy R, Maternal and Child Nutrition

1  
2  
3  
4  
5  
6  
7  
8  
9  
10  
11  
12  
13  
14  
15  
16  
17  
18  
19  
20  
21  
22  
23  
24  
25  
26  
27  
28  
29  
30  
31  
32  
33  
34  
35  
36  
37  
38  
39  
40  
41  
42  
43  
44  
45  
46  
47  
48  
49  
50  
51  
52  
53  
54  
55  
56  
57  
58  
59  
60

- 477 Study Group. Maternal and child undernutrition and overweight in low-income and  
478 middle-income countries. *The lancet* 2013; 382(9890), 427-451.
9. World Health Organization. Levels and trends in child malnutrition: key findings of  
479 the 2019 edition (No. WHO/NMH/NHD/19.20). World Health Organization. 2019.  
480
10. De Onis M, Onyango A, Borghi E, Siyam A, Blössner M, Lutter C. Worldwide  
481 implementation of the WHO child growth standards. *Public Health Nutrition*  
482 2012; 15(9), 1603-1610.
11. De Onis M, Blössner M, Borghi E. Prevalence and trends of stunting among pre-  
483 school children, 1990–2020. *Public Health Nutrition* 2012; 15(1), 142-148.
12. World Health Organization. Community-based management of severe acute  
484 malnutrition: a joint statement by the World Health Organization, the World Food  
485 Programme, the United Nations System Standing Committee on Nutrition and the  
486 United Nations Children's Fund. 2007.
13. UNICEF. Levels and trends in child malnutrition, United Nations Children's fund  
487 (UNICEF), World Health Organization, International Bank for Reconstruction and  
488 Development/The World Bank. Levels and trends in child malnutrition: key findings  
489 of the 2019 edition of the joint child malnutrition estimates. Geneva: World Health  
490 Organization; 2019 Licence: CC BY-NC-SA 3.0 IGO; 2019.
14. Central Statistical Agency (CSA)[Ethiopia] and ICF. Ethiopia demographic and  
491 health survey, Addis Ababa, Ethiopia and Calverton, Maryland, USA. 2016.
15. Yaya S, Uthman OA, Ekholuenetale M, Bishwajit G, Adjiwanou V. Effects of birth  
492 spacing on adverse childhood health outcomes: evidence from 34 countries in sub-  
493 Saharan Africa. *J Matern & Neonatal Med* 2020;33(20):3501–8.
16. Armah FA, Ekumah B, Yawson DO, Odoi JO, Afitiri A, Nyieku FE, et al. Predictive  
494 Probabilities of Access to Clean Cooking: Evidence from the Demographic and  
495 Health Surveys in 31 Countries in Sub-Saharan Africa. 2019;12(3):320–2.
17. Mamabolo RL, Alberts M, Steyn NP, Delemarre-van de Waal HA, Levitt NS.  
496 Prevalence and determinants of stunting and overweight in 3-year-old black South  
497 African children residing in the Central Region of Limpopo Province, South  
498 Africa. *Public Health Nutrition* 2005; 8(5), 501-508.
18. Novignon J, Aboagye E, Agyemang OS, Aryeetey G. Socioeconomic-related  
499 inequalities in child malnutrition: evidence from the Ghana multiple indicator  
500 cluster survey. *Health Economics Review* 2015; 5(1), 1-11.
19. Khara T, Mwangome M, Ngari M, Dolan C. Children concurrently wasted and  
501 stunted: A meta-analysis of prevalence data of children 6–59 months from 84  
502 countries. *Maternal & child nutrition*. 2018 Apr;14(2):e12516.
20. Boah M, Azupogo F, Amporfro DA, Abada LA. The epidemiology of undernutrition  
503 and its determinants in children under five years in Ghana. *Plos one*. 2019 Jul  
504 31;14(7):e0219665.
21. Khan RE, Raza MA. Determinants of malnutrition in Indian children: new evidence  
505 from IDHS through CIAF. *Quality & Quantity*. 2016 Jan 1;50(1):299-316.
22. Angood C, Khara T, Dolan C, Berkley JA, WaSt Technical Interest Group. Research  
506 priorities on the relationship between wasting and stunting. *PloS one*. 2016 May  
507 9;11(5):e0153221.

- 1  
2  
3 521 23. Corsi DJ, Neuman M, Finlay JE, Subramanian SV. Demographic and health surveys:  
4 522 a profile. *International Journal of Epidemiology* 2012; 41(6), 1602-1613.  
5 523 24. Aliaga A, Ruilin R. Cluster optimal sample size for demographic and health surveys.  
6 524 In 7th International Conference on Teaching Statistics–ICOTS (Vol. 7, pp. 2-7). 2006.  
7 525 25. Von Elm E, Altman DG, Egger M, Pocock SJ, Gøtzsche PC, Vandenbroucke JP, Strobe  
8 526 Initiative. The Strengthening the Reporting of Observational Studies in  
9 527 Epidemiology (STROBE) Statement: guidelines for reporting observational  
10 528 studies. *International journal of surgery*. 2014; 12(12), 1495-1499.  
11 529 26. Collins J, Ward BM, Snow P, Kippen S, Judd F. Compositional, Contextual, and  
12 530 Collective Community Factors in Mental Health and Well-Being in Australian Rural  
13 531 Communities. *Qualitative Health Research* 2017; 27(5), 677–687.  
14 532 <https://doi.org/10.1177/1049732315625195>  
15 533 27. Pol LG, Thomas RK. The demography of health and health care. Springer Science &  
16 534 Business Media. 2001.  
17 535 28. Armah FA, Ekumah B, Yawson DO, Odoi JO, Afitiri AR, Nyieku F.E. Access to  
18 536 improved water and sanitation in sub-Saharan Africa in a quarter century. *Heliyon*  
19 537 2018; 4(11), e00931. <https://doi.org/10.1016/j.heliyon.2018.e00931>  
20 538 29. Ross CE, Mirowsky J. Neighborhood socioeconomic status and health: context or  
21 539 composition? *City & Community* 2008; 7(2), 163–179.  
22 540 30. Amegah AK, Boachie J, Näyhä S, Jaakkola JJK. Association of biomass fuel use with  
23 541 reduced body weight of adult Ghanaian women. *J Expo Sci Environ Epidemiol* 2019;1.  
24 542 31. Alemayehu M, Tinsae F, Hailelassie K, Seid O, Gebregziabher G, Yebyo H.  
25 543 Undernutrition status and associated factors in under-5 children, in Tigray,  
26 544 Northern Ethiopia. *Nutrition* 2015; 31(7-8), 964-970.  
27 545 32. Mya KS, Kyaw AT, Tun T. Feeding practices and nutritional status of children age 6-  
28 546 23 months in Myanmar: A secondary analysis of the 2015-16 Demographic and  
29 547 Health Survey. *PloS one* 2019; 14(1), e0209044.  
30 548 33. Bork KA, Diallo A. Boys are more stunted than girls from early infancy to 3 years of  
31 549 age in rural Senegal. *The Journal of Nutrition* 2017; 147(5), 940-947.  
32 550 34. Tumilowicz A, Habicht JP, Peltó G, Pelletier DL. Gender perceptions predict sex  
33 551 differences in growth patterns of indigenous Guatemalan infants and young  
34 552 children. *The American Journal of Clinical Nutrition* 2015; 102(5), 1249-1258.  
35 553 35. Mukabutera A, Thomson DR, Hedt-Gauthier BL, Basinga P, Nyirazinyoye L, Murray  
36 554 M. Risk factors associated with underweight status in children under five: an  
37 555 analysis of the 2010 Rwanda Demographic Health Survey (RDHS). *BMC Nutrition*  
38 556 2016; 2(1), 1-12.  
39 557 36. Oyekale AS. Factors explaining acute malnutrition among under-five children in  
40 558 Sub-Sahara Africa (SSA). *Life Sci J* 2012; 9, 2101-7.  
41 559 37. Keats A. Women's schooling, fertility, and child health outcomes: Evidence from  
42 560 Uganda's free primary education program. *Journal of Development Economics*  
43 561 2018; 135, 142-159.  
44 562 38. Sunguya BF, Poudel KC, Mlunde LB, Urassa DP, Yasuoka J, Jimba M. Poor nutrition  
45 563 status and associated feeding practices among HIV-positive children in a food  
46 564 secure region in Tanzania: a call for tailored nutrition training. *PloS one* 2014; 9(5),  
47 565 e98308.  
48 566 39. Iannotti LL, Dulience SJL, Green J, Joseph S, François J, Antenor ML, ... Nickerson  
49 567 NM. Linear growth increased in young children in an urban slum of Haiti: a



- 1  
2  
3 568 randomized controlled trial of a lipid-based nutrient supplement. *The American*  
4 569 *Journal of Clinical Nutrition* 2014; 99(1), 198-208.  
5 570  
6 571 40. Lopriore C, Muehlhoff E. Food security and nutrition trends in West Africa—  
7 572 Challenges and the way forward. In Proceedings of the 2nd International Workshop  
8 573 on Food-based Approaches for a Healthy Nutrition, Ouagadougou, Burkina. 2003;  
9 574 23–28.  
10 575 41. Salami A, Kamara AB, Brixiova Z. Smallholder Agriculture in East Africa: Trends,  
11 576 Constraints and Opportunities; African Development Bank: Tunis, Tunisia, 2010.  
12 577  
13  
14

## 15 577 **Figures**

16 578 **Figure 1:** Percentage distribution of co-existence of stunting, underweight, and  
17 579 wasting (SUW) in children from the 31 study countries in SSA

18 580 **Figure 2:** Percentage distribution of co-existence of stunting, underweight, and  
19 581 wasting (SUW) in children by regions of SSA

20 582  
21 583  
22 584  
23 585  
24 586  
25 587  
26 588  
27 589  
28 590  
29 591  
30 592  
31 593  
32 594  
33 595  
34 596  
35 597  
36 598  
37 599  
38 600  
39  
40  
41  
42  
43  
44  
45  
46  
47  
48  
49  
50  
51  
52  
53  
54  
55  
56  
57  
58  
59  
60

601

602 Tables

603 Table 1: Distribution of socio-demographic, environmental and contextual variables

604

| Variable                         | %     | Variable                     | %     |
|----------------------------------|-------|------------------------------|-------|
| <b>Socio-demographic factors</b> |       |                              |       |
| Age of child                     |       | Urbanicity                   |       |
| 0                                | 30.87 | Urban                        | 33.21 |
| 1                                | 28.42 | Rural                        | 66.79 |
| 2                                | 20.22 | Place of delivery            |       |
| 3                                | 12.40 | Home                         | 31.33 |
| 4                                | 8.09  | Health facility              | 67.51 |
| Sex of child                     |       | Other                        | 1.16  |
| Male                             | 50.47 | Wealth status                |       |
| Female                           | 49.53 | Poor                         | 42.41 |
| Birth order                      |       | Middle                       | 20.28 |
| 1                                | 19.52 | Rich                         | 37.31 |
| 2 to 4                           | 48.09 | Age of household head        |       |
| 5 and above                      | 32.39 | Young-adults                 | 43.08 |
| Perceived size at birth          |       | Middle-aged adults           | 43.76 |
| Large                            | 33.71 | Old-aged adults              | 13.16 |
| Average                          | 49.74 | Sex of household head        |       |
| Small                            | 16.54 | Male                         | 79.77 |
| Mother's characteristics         |       | Female                       | 20.23 |
| Maternal age                     |       | Access to electricity        |       |
| 15-19                            | 7.13  | No                           | 69.20 |
| 20-49                            | 92.87 | Yes                          | 30.80 |
| Educational attainment           |       | <b>Environmental factors</b> |       |
| No education                     | 41.82 | Type of toilet facility      |       |

1  
2  
3  
4  
5  
6  
7  
8  
9  
10  
11  
12  
13  
14  
15  
16  
17  
18  
19  
20  
21  
22  
23  
24  
25  
26  
27  
28  
29  
30  
31  
32  
33  
34  
35  
36  
37  
38  
39  
40  
41  
42  
43  
44  
45  
46

|                                      |       |                      |             |
|--------------------------------------|-------|----------------------|-------------|
| Primary                              | 31.26 | Improved             | 42.47       |
| Secondary                            | 23.82 | Unimproved           | 57.53       |
|                                      |       | Source of drinking   |             |
| Higher                               | 3.10  | water                |             |
| Working status                       |       | Improved             | 65.63       |
| No                                   | 35.49 | Unimproved           | 34.37       |
| Yes                                  | 64.51 | Type of cooking fuel |             |
| Antenatal visits during pregnancy    |       | Clean                | 89.76       |
| No                                   | 10.76 | Unclean              | 10.24       |
| Yes                                  | 89.24 | Geographic region    |             |
| Postnatal check within 2 months      |       | Western              | 41.78       |
| No                                   | 58.49 | Eastern              | 32.84       |
| Yes                                  | 41.51 | Central              | 20.08       |
| Access to media (tv/radio/newspaper) |       | South Africa         | 5.30        |
| Yes                                  | 35.33 |                      |             |
| No                                   | 64.67 |                      | (N=127,487) |

605

606 Distribution by country is shown in appendix 1

607 Table 2: Prevalence (%) of co-existence of wasting, stunting and underweight and its associated socio-demographic and environmental  
608 factors

| Variable                         | Co-existed (weighted %) | 95% CI  | Chi <sup>2</sup> | Variable                                    | Co-existed (weighted %) | 95% CI  | Chi <sup>2</sup> |
|----------------------------------|-------------------------|---------|------------------|---------------------------------------------|-------------------------|---------|------------------|
| <b>Socio-demographic factors</b> |                         |         |                  | <b>Access to media (tv/radio/newspaper)</b> |                         |         |                  |
| Age of child                     |                         |         | p<0.001          | Yes                                         | 2.14                    | 2.0-2.2 | p<0.001          |
| 0                                | 1.75                    | 1.6-1.9 |                  | No                                          | 3.78                    | 3.6-4.0 |                  |
| 1                                | 4.44                    | 4.2-4.7 |                  | <b>Urbanicity</b>                           |                         |         |                  |
| 2                                | 3.01                    | 2.8-3.2 |                  | Urban                                       | 1.73                    | 1.6-1.9 | p<0.001          |
| 3                                | 1.62                    | 1.4-1.8 |                  | Rural                                       | 3.21                    | 3.1-3.3 |                  |

|    |                                 |      |         |         |                |      |         |
|----|---------------------------------|------|---------|---------|----------------|------|---------|
| 4  |                                 | 1.33 | 1.1-1.6 |         |                |      |         |
| 5  | <b>Sex of child</b>             |      |         |         | <b>Country</b> |      | p<0.001 |
| 6  |                                 |      |         | p<0.001 | Angola         | 2.46 | 2.1-2.8 |
| 7  | Male                            | 3.43 | 3.3-3.6 |         | Benin          | 2.04 | 1.8-2.2 |
| 8  |                                 |      |         |         |                |      | 4.9-    |
| 9  | Female                          | 1.99 | 1.9-2.1 |         | Burkina Faso   | 5.31 | 5.8     |
| 10 |                                 |      |         |         |                |      |         |
| 11 | <b>Birth order</b>              |      |         |         |                |      |         |
| 12 |                                 |      |         | p<0.001 | Burundi        | 3.76 | 3.2-4.4 |
| 13 | 1                               | 2.25 | 2.1-2.4 |         | Cameroon       | 1.27 | 0.9-1.7 |
| 14 | 2 to 4                          | 2.56 | 2.4-2.7 |         | Chad           | 5.86 | 5.2-6.5 |
| 15 | 5 and above                     | 3.23 | 3.1-3.4 |         | Comoros        | 1.98 | 1.3-2.9 |
| 16 | <b>Perceived size at birth</b>  |      |         |         |                |      |         |
| 17 |                                 |      |         | p<0.001 | Congo          | 0.98 | 0.7-1.5 |
| 18 | Large                           | 1.78 | 1.7-1.9 |         | Cote d'Ivoire  | 2.28 | 1.7-3.0 |
| 19 | Average                         | 2.6  | 2.5-2.7 |         | DR Congo       | 2.66 | 2.2-3.2 |
| 20 | Small                           | 4.98 | 4.7-5.3 |         | Ethiopia       | 3.64 | 3.2-4.1 |
| 21 | <b>Mother's characteristics</b> |      |         |         | Gabon          | 0.63 | 0.3-1.0 |
| 22 |                                 |      |         |         |                |      |         |
| 23 |                                 |      |         | P =     |                |      |         |
| 24 | Maternal age                    |      |         | 0.080   | Gambia         | 3.61 | 2.4-5.2 |
| 25 |                                 |      |         |         |                |      | 0.9-    |
| 26 | 15-19                           | 2.78 | 2.5-3.1 |         | Ghana          | 1.37 | 2.0     |
| 27 | 20-49                           | 2.71 | 2.6-2.8 |         | Guinea         | 2.26 | 1.7-2.9 |
| 28 |                                 |      |         |         |                |      |         |
| 29 | <b>Educational attainment</b>   |      |         |         |                |      |         |
| 30 |                                 |      |         | p<0.001 | Kenya          | 0.94 | 0.7-1.2 |
| 31 | No education                    | 4.19 | 4.0-4.4 |         | Lesotho        | 0.86 | 0.7-1.0 |
| 32 | Primary                         | 2.09 | 2.0-2.2 |         | Liberia        | 2.37 | 1.7-3.1 |
| 33 | Secondary                       | 1.22 | 1.1-1.3 |         | Malawi         | 1.03 | 0.7-1.4 |
| 34 | Higher                          | 0.66 | 0.4-1.0 |         | Mali           | 3.62 | 2.5-4.1 |
| 35 | <b>Working status</b>           |      |         |         |                |      |         |
| 36 |                                 |      |         | p<0.001 | Namibia        | 1.99 | 1.2-3.1 |
| 37 | No                              | 3.13 | 3.0-3.3 |         | Nigeria        | 4.1  | 3.7-4.6 |
| 38 |                                 |      |         |         |                |      |         |
| 39 |                                 |      |         |         |                |      |         |
| 40 |                                 |      |         |         |                |      |         |
| 41 |                                 |      |         |         |                |      |         |
| 42 |                                 |      |         |         |                |      |         |
| 43 |                                 |      |         |         |                |      |         |
| 44 |                                 |      |         |         |                |      |         |
| 45 |                                 |      |         |         |                |      |         |
| 46 |                                 |      |         |         |                |      |         |

|    |                                          |      |         |         |                                 |      |         |
|----|------------------------------------------|------|---------|---------|---------------------------------|------|---------|
| 1  |                                          |      |         |         |                                 |      |         |
| 2  |                                          |      |         |         |                                 |      |         |
| 3  | Yes                                      | 2.48 | 2.4-2.6 |         | Rwanda                          | 6.17 | 5.5-6.9 |
| 4  | <b>Antenatal visits during pregnancy</b> |      |         | p<0.001 | Senegal                         | 2.43 | 1.8-3.2 |
| 5  | No                                       | 5.41 | 5.0-5.8 |         | Sierra Leone                    | 1.94 | 1.4-2.5 |
| 6  |                                          |      |         |         |                                 |      | 0.02-   |
| 7  |                                          |      |         |         |                                 |      |         |
| 8  | Yes                                      | 2.39 | 2.3-2.5 |         | South Africa                    | 0.18 | 0.8     |
| 9  | <b>Postnatal check within 2 months</b>   |      |         | p<0.001 | Tanzania                        | 1.86 | 2.1-3.5 |
| 10 | No                                       | 2.93 | 2.8-3.1 |         | Togo                            | 2.72 | 2.1-3.4 |
| 11 | Yes                                      | 2.42 | 2.3-2.6 |         | Uganda                          | 1.2  | 0.8-1.7 |
| 12 | <b>Place of delivery</b>                 |      |         | p<0.001 | Zambia                          | 1.22 | 1.0-1.5 |
| 13 | Home                                     | 4.36 | 4.2-4.6 |         | Zimbabwe                        | 0.78 | 0.5-1.1 |
| 14 | Health facility                          | 1.96 | 1.9-2.1 |         | <b>Environmental factors</b>    |      |         |
| 15 |                                          |      |         |         | <b>Type of toilet</b>           |      |         |
| 16 |                                          |      |         |         | <b>facility</b>                 |      |         |
| 17 | Other                                    | 2.45 | 1.7-3.3 |         | Improved                        | 1.76 | 1.6-1.9 |
| 18 | <b>Wealth status</b>                     |      |         | p<0.001 | Unimproved                      | 3.43 | 3.3-3.6 |
| 19 | Poor                                     | 3.46 | 3.3-3.6 |         | <b>Source of drinking water</b> |      |         |
| 20 |                                          |      |         |         | Improved                        | 2.54 | 2.4-2.6 |
| 21 | Middle                                   | 2.74 | 2.5-2.9 |         | Unimproved                      | 3.06 | 2.9-3.2 |
| 22 | Rich                                     | 1.86 | 1.7-2.0 |         | <b>Type of cooking</b>          |      |         |
| 23 | <b>Age of household</b>                  |      |         | p =     | <b>fuel</b>                     |      |         |
| 24 | <b>head</b>                              |      |         | 0.276   | Clean                           | 0.98 | 1.2     |
| 25 | Young-adults                             | 2.65 | 2.5-2.8 |         | Unclean                         | 2.92 | 2.8-3.0 |
| 26 |                                          |      |         |         | <b>Geographic</b>               |      |         |
| 27 | Middle-aged adults                       | 2.76 | 2.6-2.9 |         | <b>region</b>                   |      |         |
| 28 | Old-aged adults                          | 2.8  | 2.6-3.1 |         | Western                         | 3.11 | 3.0-2.3 |
| 29 | <b>Sex of household</b>                  |      |         | p<0.001 | Eastern                         | 2.43 | 2.3-2.6 |
| 30 | <b>head</b>                              |      |         |         |                                 |      |         |
| 31 | Male                                     | 2.82 | 2.7-2.9 |         |                                 |      |         |
| 32 | Female                                   | 2.33 | 2.1-2.5 |         |                                 |      |         |
| 33 |                                          |      |         |         |                                 |      |         |
| 34 |                                          |      |         |         |                                 |      |         |
| 35 |                                          |      |         |         |                                 |      |         |
| 36 |                                          |      |         |         |                                 |      |         |
| 37 |                                          |      |         |         |                                 |      |         |
| 38 |                                          |      |         |         |                                 |      |         |
| 39 |                                          |      |         |         |                                 |      |         |
| 40 |                                          |      |         |         |                                 |      |         |
| 41 |                                          |      |         |         |                                 |      |         |
| 42 |                                          |      |         |         |                                 |      |         |
| 43 |                                          |      |         |         |                                 |      |         |
| 44 |                                          |      |         |         |                                 |      |         |
| 45 |                                          |      |         |         |                                 |      |         |
| 46 |                                          |      |         |         |                                 |      |         |

**Access to electricity**

p&lt;0.001

Central

2.87 2.7-3.1

0.66-

No  
Yes3.21 3.1-3.3  
1.61 1.5-1.7

South Africa

0.88 1.1

609

610

611 **Table 3: Multinomial regression showing risk factors of co-existence of stunting, underweight, and wasting**

| Variable                                    | Base outcome (Ref: Normal) |        |       |                                  |        |       |
|---------------------------------------------|----------------------------|--------|-------|----------------------------------|--------|-------|
|                                             | Single and two dimensions  |        |       | Co-existence of three-dimensions |        |       |
|                                             | RRR                        | 95% CI |       | RRR                              | 95% CI |       |
| <b>Age of child (Ref:0)</b>                 |                            |        |       |                                  |        |       |
| 1                                           | 2.008***                   | 1.93   | 2.089 | 3.714***                         | 3.319  | 4.156 |
| 2                                           | 2.624***                   | 2.514  | 2.739 | 2.827***                         | 2.48   | 3.222 |
| 3                                           | 2.122***                   | 2.018  | 2.231 | 1.464***                         | 1.227  | 1.748 |
| 4                                           | 1.504***                   | 1.417  | 1.597 | 1.051                            | 0.84   | 1.315 |
| <b>Sex of child (Ref: Male)</b>             |                            |        |       |                                  |        |       |
| Female                                      | 0.752***                   | 0.731  | 0.775 | 0.468***                         | 0.429  | 0.51  |
| <b>Birth order (Ref: 1)</b>                 |                            |        |       |                                  |        |       |
| 2                                           | 0.938**                    | 0.896  | 0.981 | 1.002                            | 0.875  | 1.146 |
| 5 and above                                 | 0.969                      | 0.92   | 1.021 | 0.995                            | 0.858  | 1.155 |
| <b>Perceived size at birth (Ref: Large)</b> |                            |        |       |                                  |        |       |
| Average                                     | 1.32***                    | 1.276  | 1.365 | 1.756***                         | 1.574  | 1.958 |
| Small                                       | 1.931***                   | 1.846  | 2.02  | 3.818***                         | 3.383  | 4.308 |
| <b>Maternal age (Ref: 15-19)</b>            |                            |        |       |                                  |        |       |
| 20-49                                       | 0.834***                   | 0.78   | 0.891 | 0.881                            | 0.735  | 1.056 |
| <b>Educational attainment (Ref: Higher)</b> |                            |        |       |                                  |        |       |
| No education                                | 2.624***                   | 2.305  | 2.987 | 3.291***                         | 1.961  | 5.522 |
| Primary                                     | 2.189***                   | 1.927  | 2.487 | 2.381***                         | 1.417  | 4.001 |

|    |                                                        |          |       |       |          |       |        |
|----|--------------------------------------------------------|----------|-------|-------|----------|-------|--------|
| 1  |                                                        |          |       |       |          |       |        |
| 2  |                                                        |          |       |       |          |       |        |
| 3  | Secondary                                              | 1.751*** | 1.545 | 1.985 | 1.617    | 0.971 | 2.691  |
| 4  | <b>Working status (Ref: Yes)</b>                       |          |       |       |          |       |        |
| 5  | No                                                     | 1.018    | 0.984 | 1.053 | 1.195*** | 1.086 | 1.314  |
| 6  | <b>Antenatal visits during pregnancy (Ref: Yes)</b>    |          |       |       |          |       | <0.001 |
| 7  | No                                                     | 1.139*** | 1.079 | 1.201 | 1.364*** | 1.208 | 1.541  |
| 8  | <b>Postnatal check within 2 months (Ref: Yes)</b>      |          |       |       |          |       |        |
| 9  | No                                                     | 0.98     | 0.946 | 1.015 | 0.977    | 0.879 | 1.086  |
| 10 | <b>Place of delivery (Ref: Health facility)</b>        |          |       |       |          |       |        |
| 11 | Home                                                   | 1.183*** | 1.137 | 1.23  | 1.372*** | 1.232 | 1.529  |
| 12 | Other                                                  | 1.046    | 0.912 | 1.201 | 1.047    | 0.71  | 1.543  |
| 13 | <b>Wealth status (Ref: Rich)</b>                       |          |       |       |          |       |        |
| 14 | Poor                                                   | 1.297*** | 1.235 | 1.361 | 1.408*** | 1.235 | 1.605  |
| 15 | Middle                                                 | 1.195*** | 1.138 | 1.254 | 1.214**  | 1.054 | 1.397  |
| 16 | <b>Age of household head (Ref: Young-adult)</b>        |          |       |       |          |       |        |
| 17 | Middle-aged adults                                     | 0.954**  | 0.921 | 0.987 | 1.01     | 0.913 | 1.118  |
| 18 | Old-aged adults                                        | 0.974    | 0.93  | 1.021 | 1.065    | 0.936 | 1.213  |
| 19 | <b>Sex of household head (Ref: Male)</b>               |          |       |       |          |       |        |
| 20 | Female                                                 | 0.977    | 0.94  | 1.015 | 1.035    | 0.925 | 1.159  |
| 21 | <b>Access to media (tv/radio/newspaper) (Ref: Yes)</b> |          |       |       |          |       |        |
| 22 | No                                                     | 1.079*** | 1.042 | 1.117 | 1.255*** | 1.144 | 1.377  |
| 23 | <b>Access to electricity (Ref: Yes)</b>                |          |       |       |          |       |        |
| 24 | No                                                     | 1.136*** | 1.083 | 1.191 | 1.062    | 0.922 | 1.225  |
| 25 | <b>Type of toilet facility (Ref: Improved)</b>         |          |       |       |          |       |        |
| 26 | Unimproved                                             | 1.027    | 0.991 | 1.065 | 1.158**  | 1.032 | 1.3    |
| 27 | <b>Source of drinking water (Ref: Improved)</b>        |          |       |       |          |       |        |
| 28 | Unimproved                                             | 0.959**  | 0.928 | 0.99  | 0.968    | 0.885 | 1.058  |
| 29 | <b>Type of cooking fuel (Ref: Clean)</b>               |          |       |       |          |       |        |
| 30 | Unclean                                                | 1.177*** | 1.089 | 1.271 | 1.316    | 0.97  | 1.787  |
| 31 | <b>Urbanicity (Ref: Urban)</b>                         |          |       |       |          |       |        |
| 32 | Rural                                                  | 1.05**   | 1.006 | 1.095 | 0.943    | 0.832 | 1.069  |

612 Country-level risk of co-existence of stunting, underweight and wasting, were also estimated (see appendix 2)

1  
2  
3  
4  
5  
6  
7  
8  
9  
10  
11  
12  
13  
14  
15  
16  
17  
18  
19  
20  
21  
22  
23  
24  
25  
26  
27  
28  
29  
30  
31  
32  
33  
34  
35  
36  
37  
38  
39  
40  
41  
42  
43  
44  
45  
46

613

614

615

For peer review only



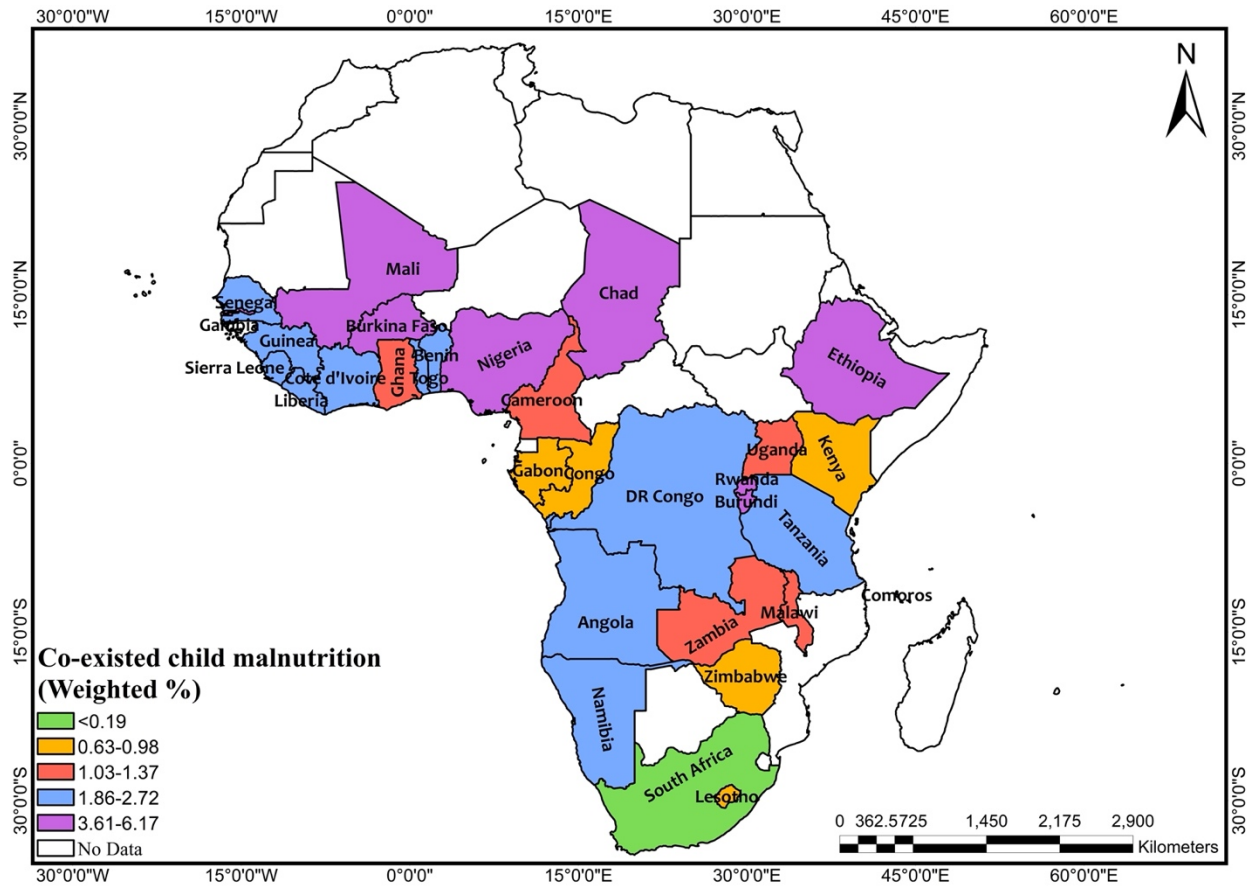

Figure 1: Percentage distribution of co-existence of stunting, underweight, and wasting (SUW) in children from the 31 study countries in SSA

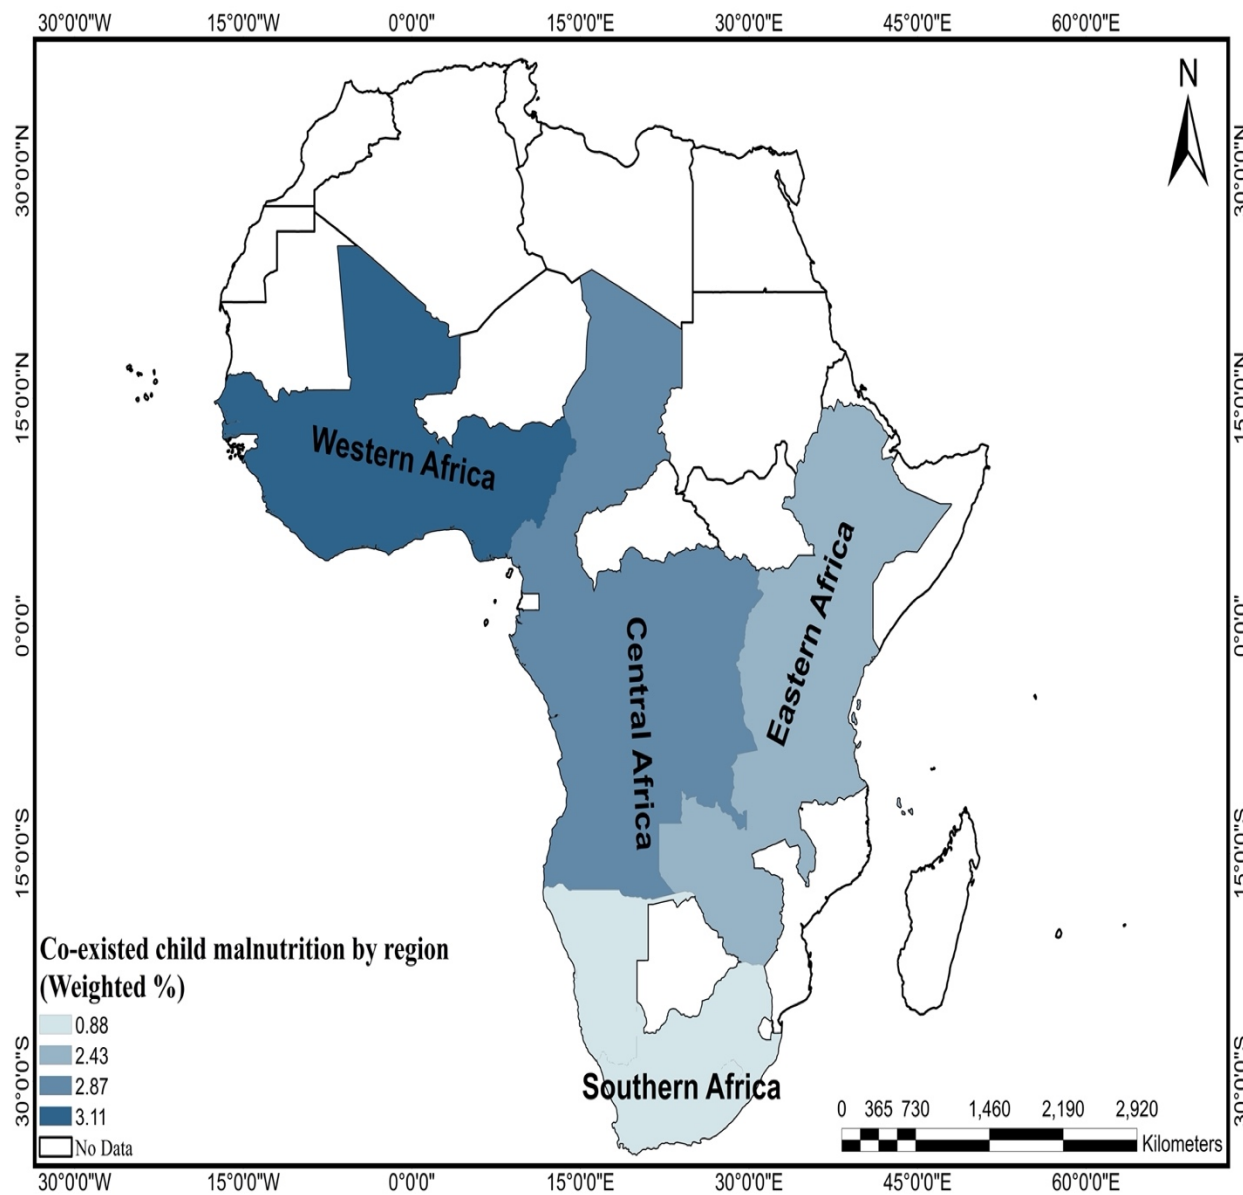

**Figure 2:** Percentage distribution of co-existence of stunting, underweight, and wasting (SUW) in children by regions of SSA

## Supplementary Tables

**Appendix 1: Distribution of sample by country**

| Country       | Survey year | n      | %     |
|---------------|-------------|--------|-------|
| Angola        | 2015-16     | 7,318  | 5.74  |
| Benin         | 2017-18     | 15,473 | 12.14 |
| Burkina Faso  | 2010        | 8,908  | 6.99  |
| Burundi       | 2016-17     | 4,172  | 3.27  |
| Cameroon      | 2018        | 2,911  | 2.28  |
| Chad          | 2014-2015   | 5,999  | 4.71  |
| Comoros       | 2012        | 1,320  | 1.03  |
| Congo         | 2013        | 2,609  | 2.05  |
| Cote d'Ivoire | 2011-12     | 2,174  | 1.71  |
| Congo DR      | 2013-14     | 4,806  | 3.77  |
| Ethiopia      | 2016        | 6,573  | 5.16  |
| Gabon         | 2012        | 1,960  | 1.54  |
| Gambia        | 2013        | 743    | 0.58  |
| Ghana         | 2014        | 1,896  | 1.49  |
| Guinea        | 2018        | 2,237  | 1.75  |
| Kenya         | 2014        | 6,066  | 4.76  |
| Lesotho       | 2014        | 1,012  | 0.79  |
| Liberia       | 2013        | 1,946  | 1.53  |
| Malawi        | 2015-16     | 4,027  | 3.16  |
| Mali          | 2018        | 5,653  | 4.43  |
| Namibia       | 2013        | 905    | 0.71  |
| Nigeria       | 2018        | 7,379  | 5.79  |
| Rwanda        | 2014-15     | 4,408  | 3.46  |
| Senegal       | 2010-11     | 1,944  | 1.52  |
| Sierra Leone  | 2019        | 2,689  | 2.11  |
| South Africa  | 2016        | 855    | 0.67  |
| Tanzania      | 2015-16     | 6,061  | 4.75  |
| Togo          | 2013-14     | 2,220  | 1.74  |
| Uganda        | 2016        | 2,891  | 2.27  |
| Zambia        | 2018        | 6,347  | 4.98  |
| Zimbabwe      | 2015        | 3,987  | 3.13  |

| Appendix 2: Multicollinearity diagnosis |      |          |           |           |
|-----------------------------------------|------|----------|-----------|-----------|
| Variable                                | VIF  | SQRT VIF | Tolerance | R-Squared |
| Age of child                            | 1.05 | 1.02     | 0.9547    | 0.0453    |
| Sex of child                            | 1.01 | 1        | 0.9948    | 0.0052    |
| Birth order                             | 1.36 | 1.17     | 0.7366    | 0.2634    |
| Perceived size at birth                 | 1.02 | 1.01     | 0.9798    | 0.0202    |
| Age at child birth                      | 1.22 | 1.1      | 0.8224    | 0.1776    |
| Educational attainment                  | 1.51 | 1.23     | 0.664     | 0.336     |
| Working status                          | 1.07 | 1.03     | 0.9357    | 0.0643    |
| Antenatal visits during pregnancy       | 1.25 | 1.12     | 0.7976    | 0.2024    |
| Postnatal check within 2 months         | 1.1  | 1.05     | 0.9098    | 0.0902    |
| Place of delivery                       | 1.31 | 1.15     | 0.7617    | 0.2383    |
| Wealth status                           | 1.8  | 1.34     | 0.5554    | 0.4446    |
| Age of household head                   | 1.05 | 1.02     | 0.9546    | 0.0454    |
| Sex of household head                   | 1.03 | 1.02     | 0.9702    | 0.0298    |
| Access to media (tv/radio/newspaper)    | 1.26 | 1.12     | 0.7913    | 0.2087    |
| Access to electricity                   | 1.71 | 1.31     | 0.5837    | 0.4163    |
| Type of toilet facility                 | 1.35 | 1.16     | 0.7404    | 0.2596    |
| Source of drinking water                | 1.09 | 1.04     | 0.9191    | 0.0809    |
| Type of cooking fuel                    | 1.31 | 1.14     | 0.7653    | 0.2347    |
| Urbanicity                              | 1.58 | 1.26     | 0.6319    | 0.3681    |
| Country                                 | 1.17 | 1.08     | 0.8579    | 0.1421    |
| Mean VIF                                | 1.26 |          |           |           |

## Appendix 3: Country-level risk of co-existence of stunting, wasting, and underweight

|                              | Base outcome (Ref: Normal) |        |       |                                  |        |       |
|------------------------------|----------------------------|--------|-------|----------------------------------|--------|-------|
|                              | Single and two dimensions  |        |       | Co-existence of three-dimensions |        |       |
|                              | RRR                        | 95% CI |       | RRR                              | 95% CI |       |
| <b>Country (Ref: Angola)</b> |                            |        |       |                                  |        |       |
| Benin                        | 0.651***                   | 0.598  | 0.708 | 0.625***                         | 0.489  | 0.798 |
| Burkina Faso                 | 0.952                      | 0.866  | 1.046 | 1.946***                         | 1.526  | 2.481 |
| Burundi                      | 1.580***                   | 1.424  | 1.753 | 2.049***                         | 1.545  | 2.718 |
| Cameroon                     | 0.669***                   | 0.593  | 0.756 | 0.398***                         | 0.261  | 0.609 |
| Chad                         | 0.910                      | 0.823  | 1.007 | 1.505**                          | 1.184  | 1.913 |
| Comoros                      | 0.883                      | 0.745  | 1.046 | 0.656                            | 0.378  | 1.138 |
| Congo                        | 0.674***                   | 0.580  | 0.783 | 0.472**                          | 0.279  | 0.800 |
| Cote d'Ivoire                | 0.734***                   | 0.638  | 0.844 | 0.739                            | 0.492  | 1.109 |
| DR Congo                     | 1.229***                   | 1.100  | 1.373 | 1.351                            | 0.988  | 1.847 |
| Ethiopia                     | 0.810***                   | 0.726  | 0.904 | 0.813                            | 0.604  | 1.095 |
| Gabon                        | 0.495***                   | 0.415  | 0.59  | 0.319**                          | 0.128  | 0.796 |
| Gambia                       | 0.732**                    | 0.603  | 0.889 | 1.001                            | 0.618  | 1.620 |
| Ghana                        | 0.453***                   | 0.386  | 0.531 | 0.545**                          | 0.346  | 0.857 |
| Guinea                       | 0.798***                   | 0.705  | 0.904 | 0.726                            | 0.509  | 1.036 |
| Kenya                        | 0.553***                   | 0.498  | 0.615 | 0.321***                         | 0.230  | 0.449 |
| Lesotho                      | 0.777**                    | 0.654  | 0.924 | 0.369***                         | 0.177  | 0.772 |
| Liberia                      | 0.658***                   | 0.565  | 0.768 | 0.776                            | 0.484  | 1.243 |
| Malawi                       | 0.794***                   | 0.708  | 0.889 | 0.447***                         | 0.291  | 0.687 |
| Mali                         | 0.600***                   | 0.541  | 0.664 | 1.006                            | 0.769  | 1.316 |
| Namibia                      | 0.680***                   | 0.568  | 0.815 | 0.849                            | 0.505  | 1.426 |
| Nigeria                      | 0.953                      | 0.868  | 1.046 | 1.527**                          | 1.183  | 1.972 |
| Rwanda                       | 1.059                      | 0.954  | 1.176 | 1.991***                         | 1.541  | 2.571 |
| Senegal                      | 0.660***                   | 0.572  | 0.761 | 0.643*                           | 0.434  | 0.952 |
| Sierra Leone                 | 0.641***                   | 0.567  | 0.725 | 0.656*                           | 0.447  | 0.963 |
| South Africa                 | 0.788*                     | 0.634  | 0.979 | 0.108***                         | 0.033  | 0.352 |
| Tanzania                     | 0.772***                   | 0.699  | 0.851 | 0.699**                          | 0.512  | 0.954 |
| Togo                         | 0.557***                   | 0.490  | 0.633 | 0.838                            | 0.590  | 1.190 |
| Uganda                       | 0.627***                   | 0.556  | 0.708 | 0.421***                         | 0.278  | 0.637 |
| Zambia                       | 0.904*                     | 0.818  | 0.998 | 0.519***                         | 0.366  | 0.736 |
| Zimbabwe                     | 0.693***                   | 0.620  | 0.775 | 0.344***                         | 0.214  | 0.554 |

# BMJ Open

## Risk factors associated with the co-existence of stunting, underweight, and wasting in children under five: Analysis of cross-sectional surveys from 31 sub-Saharan African countries

|                                 |                                                                                                                                                                                                                                                                                                                                                                                                                                                                                                                                                                                                                                                                                                                                                                                                                                                                                                                                                                                                                                                                                                                                                                                                                                                                                                                                                                                                                                                                                                                                                                                                                                                                                                                                                                                                                                              |
|---------------------------------|----------------------------------------------------------------------------------------------------------------------------------------------------------------------------------------------------------------------------------------------------------------------------------------------------------------------------------------------------------------------------------------------------------------------------------------------------------------------------------------------------------------------------------------------------------------------------------------------------------------------------------------------------------------------------------------------------------------------------------------------------------------------------------------------------------------------------------------------------------------------------------------------------------------------------------------------------------------------------------------------------------------------------------------------------------------------------------------------------------------------------------------------------------------------------------------------------------------------------------------------------------------------------------------------------------------------------------------------------------------------------------------------------------------------------------------------------------------------------------------------------------------------------------------------------------------------------------------------------------------------------------------------------------------------------------------------------------------------------------------------------------------------------------------------------------------------------------------------|
| Journal:                        | <i>BMJ Open</i>                                                                                                                                                                                                                                                                                                                                                                                                                                                                                                                                                                                                                                                                                                                                                                                                                                                                                                                                                                                                                                                                                                                                                                                                                                                                                                                                                                                                                                                                                                                                                                                                                                                                                                                                                                                                                              |
| Manuscript ID                   | bmjopen-2021-052267.R2                                                                                                                                                                                                                                                                                                                                                                                                                                                                                                                                                                                                                                                                                                                                                                                                                                                                                                                                                                                                                                                                                                                                                                                                                                                                                                                                                                                                                                                                                                                                                                                                                                                                                                                                                                                                                       |
| Article Type:                   | Original research                                                                                                                                                                                                                                                                                                                                                                                                                                                                                                                                                                                                                                                                                                                                                                                                                                                                                                                                                                                                                                                                                                                                                                                                                                                                                                                                                                                                                                                                                                                                                                                                                                                                                                                                                                                                                            |
| Date Submitted by the Author:   | 11-Oct-2021                                                                                                                                                                                                                                                                                                                                                                                                                                                                                                                                                                                                                                                                                                                                                                                                                                                                                                                                                                                                                                                                                                                                                                                                                                                                                                                                                                                                                                                                                                                                                                                                                                                                                                                                                                                                                                  |
| Complete List of Authors:       | <p>Amadu, Iddrisu; University of Cape Coast, Africa Centre of Excellence in Coastal Resilience, University of Cape Coast, Cape Coast, Ghana;<br/> University of Cape Coast, Department of Fisheries and Aquatic Sciences, School of Biological Sciences, College of Agriculture and Natural Sciences, University of Cape Coast, Ghana</p> <p>Seidu, Abdul-Aziz; University of Cape Coast, Department of Population and Health; James Cook University, College of Public Health, Medical and Veterinary Sciences, James Cook University, Townsville, Queensland, Australia</p> <p>Duku, Eric; University of Cape Coast, Africa Centre of Excellence in Coastal Resilience, University of Cape Coast, Cape Coast, Ghana;<br/> University of Cape Coast, Department of Fisheries and Aquatic Sciences, School of Biological Sciences, College of Agriculture and Natural Sciences, University of Cape Coast, Ghana</p> <p>Boadu Frimpong, James; University of Cape Coast, Department of Health, Physical Education, and Recreation, University of Cape Coast, Cape Coast, Ghana</p> <p>Hagan Jnr., John; University of Cape Coast, Department of Health, Physical Education, and Recreation, University of Cape Coast, Cape Coast, Ghana</p> <p>Aboagye, Richard ; University of Health and Allied Sciences, School of Public Health, University of Health and Allied Sciences, Ho, Ghana</p> <p>Ampah, Belinda; Nursing and Midwifery Training College, Department of Academics, Nursing and Midwifery Training College, P.O.Box, 7, Esiama, Ghana</p> <p>Adu, Collins; Kwame Nkrumah University of Science and Technology, Department of Health Promotion and Disability Studies</p> <p>Ahinkorah, Bright; University of Technology Sydney, School of Public Health, Faculty of Health, University of Technology Sydney, NSW, Australia.</p> |
| <b>Primary Subject Heading</b>: | Public health                                                                                                                                                                                                                                                                                                                                                                                                                                                                                                                                                                                                                                                                                                                                                                                                                                                                                                                                                                                                                                                                                                                                                                                                                                                                                                                                                                                                                                                                                                                                                                                                                                                                                                                                                                                                                                |
| Secondary Subject Heading:      | Health services research, Health policy, Global health                                                                                                                                                                                                                                                                                                                                                                                                                                                                                                                                                                                                                                                                                                                                                                                                                                                                                                                                                                                                                                                                                                                                                                                                                                                                                                                                                                                                                                                                                                                                                                                                                                                                                                                                                                                       |
| Keywords:                       | Public health < INFECTIOUS DISEASES, Epidemiology < TROPICAL MEDICINE, Child protection < PAEDIATRICS                                                                                                                                                                                                                                                                                                                                                                                                                                                                                                                                                                                                                                                                                                                                                                                                                                                                                                                                                                                                                                                                                                                                                                                                                                                                                                                                                                                                                                                                                                                                                                                                                                                                                                                                        |

1  
2  
3  
4  
5  
6  
7  
8  
9  
10  
11  
12  
13  
14  
15  
16  
17  
18  
19  
20  
21  
22  
23  
24  
25  
26  
27  
28  
29  
30  
31  
32  
33  
34  
35  
36  
37  
38  
39  
40  
41  
42  
43  
44  
45  
46  
47  
48  
49  
50  
51  
52  
53  
54  
55  
56  
57  
58  
59  
60



SCHOLARONE™  
Manuscripts

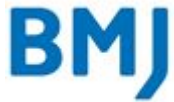

I, the Submitting Author has the right to grant and does grant on behalf of all authors of the Work (as defined in the below author licence), an exclusive licence and/or a non-exclusive licence for contributions from authors who are: i) UK Crown employees; ii) where BMJ has agreed a CC-BY licence shall apply, and/or iii) in accordance with the terms applicable for US Federal Government officers or employees acting as part of their official duties; on a worldwide, perpetual, irrevocable, royalty-free basis to BMJ Publishing Group Ltd ("BMJ") its licensees and where the relevant Journal is co-owned by BMJ to the co-owners of the Journal, to publish the Work in this journal and any other BMJ products and to exploit all rights, as set out in our [licence](#).

The Submitting Author accepts and understands that any supply made under these terms is made by BMJ to the Submitting Author unless you are acting as an employee on behalf of your employer or a postgraduate student of an affiliated institution which is paying any applicable article publishing charge ("APC") for Open Access articles. Where the Submitting Author wishes to make the Work available on an Open Access basis (and intends to pay the relevant APC), the terms of reuse of such Open Access shall be governed by a Creative Commons licence – details of these licences and which [Creative Commons](#) licence will apply to this Work are set out in our licence referred to above.

Other than as permitted in any relevant BMJ Author's Self Archiving Policies, I confirm this Work has not been accepted for publication elsewhere, is not being considered for publication elsewhere and does not duplicate material already published. I confirm all authors consent to publication of this Work and authorise the granting of this licence.



1  
2  
3  
4  
5  
6  
7  
8  
9  
10  
11  
12

1 **Risk factors associated with the co-existence of stunting, underweight, and wasting in**  
2 **children under five: Analysis of cross-sectional surveys from 31 sub-Saharan African**  
3 **countries**

4 Iddrisu Amadu<sup>1,2,3</sup>, Abdul-Aziz Seidu<sup>4,5,6</sup>, Eric Duku<sup>1,2</sup>, James Boadu Frimpong<sup>7</sup>, John Elvis  
5 Hagan Jr<sup>7,8</sup>, Richard Gyan Aboagye<sup>9</sup>, Belinda Ampah<sup>10</sup>, Collins Adu<sup>11</sup>, Bright Opoku  
6 Ahinkorah<sup>12</sup>  
7

- 8  
9  
10  
11  
12  
13  
14  
15  
16  
17  
18  
19  
20  
21  
22  
23  
24  
25  
26  
27  
28  
29  
30  
31  
32  
33  
34  
35  
36  
37  
38  
39  
40
1. Africa Centre of Excellence in Coastal Resilience, University of Cape Coast, Cape Coast, Ghana
  2. Department of Fisheries and Aquatic Sciences, School of Biological Sciences, College of Agriculture and Natural Sciences, University of Cape Coast, Ghana
  3. Emperiks Research, NToo85, Tamale, Ghana
  4. Department of Population and Health, College of Humanities and Legal Studies, University of Cape Coast, Ghana.
  5. College of Public Health, Medical and Veterinary Sciences, James Cook University, Townsville, Queensland, Australia
  6. Department of Estate Management, Takoradi Technical University, Takoradi, Ghana
  7. Department of Health, Physical Education, and Recreation, University of Cape Coast, Cape Coast, Ghana
  8. Neurocognition and Action-Biomechanics-Research Group, Faculty of Psychology and Sport Sciences, Bielefeld University, Bielefeld-Germany
  9. School of Public Health, University of Health and Allied Sciences, Ho, Ghana
  10. Department of Academics, Nursing and Midwifery Training College, P.O.Box, 7, Esiama, Ghana
  11. Department of Health Promotion, Education and Disability Studies, Kwame Nkrumah University of Science and Technology, Kumasi, Ghana
  12. School of Public Health, Faculty of Health, University of Technology Sydney, NSW, Australia.

41 **Email addresses**

42  
43  
44  
45  
46  
47  
48  
49  
50  
51  
52  
53  
54  
55

31 IA: iddrisu.amadu@stu.ucc.edu.gh  
32 \*AS: abdul-aziz.seidu@stu.ucc.edu.gh  
33 ED: eric.duku@stu.ucc.edu.gh  
34 JBF: frimpongboadujames@gmail.com  
35 JEH: elvis.hagan@ucc.edu.gh  
36 RGA: raboagye18@sph.uhas.edu.gh  
37 BA: [oyebel@gmail.com](mailto:oyebel@gmail.com)  
38 CA: collinsadu80@yahoo.com  
39 BOA: brightahinkorah@gmail.com  
40

41 **Correspondence to:**

42 Abdul-Aziz Seidu, Department of Population and Health, University of Cape Coast, PMB TF0494,  
43 Cape Coast, Ghana, Email:abdul-aziz.seidu@stu.ucc.edu.gh

1  
2  
3 44 **ABSTRACT**  
4

5 45 **Objective:** This study investigated the risk factors associated with the co-existence of  
6 46 stunting, underweight, and wasting among children under age five in sub-Saharan  
7 47 Africa(SSA).

8  
9 48 **Methods:** Data from 31 sub-Saharan African countries were pooled from the Demographic  
10 49 and Health Surveys collected between 2010 and 2019. We examined the risk of co-  
11 50 existence of undernutrition using multinomial logistic regression models, with results  
12 51 presented as relative risk ratios with their respective confidence intervals.

13  
14  
15 52 **Outcome measures:** The outcome variables were three child anthropometrics: stunting  
16 53 (height-for-age z-scores); underweight (weight-for-age z-scores); and wasting (weight-for-  
17 54 height z-scores).

18  
19 55 **Results:** The prevalence of co-existence of stunting, underweight, and wasting varied  
20 56 across countries and sub-regions, with the highest and lowest prevalence of co-existence  
21 57 of stunting, underweight, and wasting as Benin (12.14%) and Gambia (0.58%) respectively.  
22 58 The risk of co-existence of the three undernutrition dimensions was higher among children  
23 59 age 1 year compared to those aged 0. The risk of co-existence of the three dimensions was  
24 60 higher among female children, those with small size at birth, those whose mothers had no  
25 61 education, not working, had no antenatal visits during pregnancy, children delivered at  
26 62 home, those whose mothers were poor, had no access to media and children whose  
27 63 mothers had unimproved toilet facility.

28  
29  
30  
31 64 **Conclusion:** Findings suggest the urgent need for consideration of the co-existence of  
32 65 stunting, wasting and underweight among under-five children in policy design and  
33 66 programming of interventions to eradicate child malnutrition in SSA. In the short-term,  
34 67 national-level policies and interventions need to be well-tailored considering the  
35 68 compositional characteristics. In the long-term, regional policies and coordinated  
36 69 interventions among governments of SSA countries need to be designed to address the  
37 70 disparate prevalence of the co-existence of stunting, wasting and underweight in under-  
38 71 five children across the four geographic regions.

39  
40  
41 72 **Keywords:** co-existence; stunting; underweight; wasting; children under five; sub-Saharan  
42 73 Africa  
43  
44  
45  
46  
47  
48  
49  
50  
51  
52  
53  
54  
55  
56  
57  
58  
59  
60

1  
2  
3 74  
4  
5  
6  
7  
8  
9  
10  
11  
12  
13  
14  
15  
16  
17  
18  
19  
20  
21  
22  
23  
24  
25  
26  
27  
28  
29  
30  
31  
32  
33  
34  
35  
36  
37  
38  
39  
40  
41  
42  
43  
44  
45  
46  
47  
48  
49  
50  
51  
52  
53  
54  
55  
56  
57  
58  
59  
60

### ***Strength and Limitations***

- The use of nationally representative data ensures that our findings are generalizable and replicable in the 31 SSA countries included in this study.
- Findings contribute to bridging the gaps identified in the current research on CNS by including multiple indicators (stunting, underweight, and wasting) in the concurrent measurement of our outcome variable, compared to the unitary assessment on undernutrition that currently dominates literature.
- The study relied on secondary data, the analysis was limited to only variables that were in the dataset. Hence, interpretations and inferences made from current findings must be limited to only these observed variables.
- Also, the DHS employs cross-sectional designs which restrict causality on the noted outcomes.
- The key variables were self-reported by the mothers, and therefore, there is the likelihood of recall bias and other social desirability concerns in the present study.

75

76

77

78

79

80

81

## 82 BACKGROUND

83 Undernutrition among children under 5 years remains a major public health problem  
84 across many low-and middle-income countries<sup>1-3</sup>. Factors such as insufficient food intake,  
85 diarrhoea, recurring infections, poor sanitation practices, and low parental education have  
86 been identified as significant contributors to the high prevalence of undernutrition during  
87 childhood<sup>4,5</sup>. Despite the numerous interventions rolled out to address childhood  
88 undernutrition especially in sub-Saharan Africa where the phenomenon is quite pervasive,  
89 the progress seems to be insignificant<sup>6,7</sup>. For example, a study reported that child  
90 undernutrition accounted for nearly half (45%) of the child mortality rate in low-and middle-  
91 income countries<sup>8</sup>. Aside from that, it was reported in 2018 that about 149 million and 49  
92 million children under age 5 were stunted and wasted respectively<sup>9</sup>.

93 Three main indicators that are often used to represent undernutrition are underweight or  
94 low weight for age, stunting or low height for age, and wasting or low weight for height<sup>2,10-</sup>  
95 <sup>12</sup>. Among the three indicators of undernutrition, stunting has been identified as the  
96 problem with the greatest magnitude among under 5 children in developing countries<sup>2,3</sup>.  
97 Even though the prevalence of stunting in sub-Saharan Africa is declining, it is worth noting  
98 that it is still above 30%<sup>13</sup> which is undeniably high. Research also indicates that the country-  
99 specific prevalence of stunting, underweight and wasting is still high<sup>2,3</sup>. For instance, in  
100 Ethiopia, the prevalence of wasting and stunting were 10% and 38% respectively<sup>14</sup>.  
101 Additionally, the prevalence of stunting, underweight and wasting among children in  
102 South Africa were 35.8%, 20.5%, and 17.2%<sup>3</sup>. Likewise, Anin et al.<sup>2</sup> reported 33.2%, 14.1%, 27%  
103 and 2.6% of prevalence in stunting, wasting, underweight and overweight among infants  
104 (6-23 months) across Northern Ghana.

105 Previous studies have investigated the compositional and contextual risk factors  
106 associated with either stunting, underweight or wasting among children under 5 years and  
107 found the age of a child, sex of the child, child's size at birth, mother's age during  
108 childbirth, mother's educational level, birth order, place of residence and mother's body  
109 mass index (BMI) as associated factors<sup>1-3,15,16</sup>. Other studies also found a significant linkage  
110 between household wealth quintile and maternal short stature, and nutritional status of  
111 children under 5<sup>17,18</sup>. Regarding the sex of a child, for example, female children were found  
112 to be less likely to suffer from stunting compared to males<sup>1,3</sup>.

113 Apart from studies that have examined the factors associated with either stunting,  
114 underweight, and wasting, some scholars have begun looking at predictors of the co-  
115 existence of any two or three of the indicators of malnutrition. A study in 84 countries that  
116 examined the prevalence and predictors of co-existence of stunting and wasting found  
117 sex and age of children as significant predictors<sup>19</sup>. Other studies in Ghana<sup>20</sup> and India<sup>21</sup> also  
118 examined the co-existence of stunting, underweight, and wasting and found birth interval,  
119 birth weight, dietary diversity, place of delivery, wealth index, mother's BMI, mother's  
120 educational level, and partners' educational level as associated factors. The need to  
121 examine the co-existence of stunting, underweight and wasting is important because not  
122 much work has been done on that subject and hence children who concurrently suffer  
123 from stunting, underweight, and wasting are less likely to be reached in malnutrition  
124 prevention programmes, especially in SSA. For instance, some scholars have indicated that  
125 despite evidence that wasting and stunting are global public health problems that  
126 frequently co-exist, they are usually separated in terms of policy, guidance, programming

1  
2  
3 127 and financing<sup>22</sup>. This creates a gap in the literature that needs to be filled. Despite the  
4 128 detrimental consequences of undernutrition on the health and wellbeing of children under  
5 129 5 in SSA, studies utilizing current, and nationally representative data to investigate the risk  
6 130 factors associated with the co-existence of stunting, underweight, and wasting among this  
7 131 age group are absent in the literature. Studies presenting empirical analyses of the co-  
8 132 existence of these three indicators of child undernutrition in SSA are absent in extant  
9 133 literature making it difficult for policymakers and nutritional experts to provide up-to-date  
10 134 trends with appropriate strategies to curb the situation in the sub-region. This research lag  
11 135 presents a void in extant literature which this study seeks to bridge. Therefore, the study  
12 136 investigated the risk factors of the co-existence of stunting, underweight, and wasting  
13 137 among children under age 5 in sub-Saharan Africa using data from the Demographic Health  
14 138 Survey (DHS) conducted in 31 countries between 2010 and 2019. The findings of the study  
15 139 could contribute to the formulation of policies and interventions to respond to the  
16 140 nutritional needs of children under 5 years and also suggest pragmatic ways of reducing  
17 141 undernutrition among children in the sub-region.  
18  
19  
20  
21  
22  
23

## 143 **METHODS**

### 144 **Data Source**

145 The dataset included 127,487 children under the age of 5 years from 31 sub-Saharan African  
146 countries (Figure 1) were pooled from the most current Demographic and Health Surveys  
147 (DHS) conducted between 2010 and 2019 (Appendix 1). Specifically, the data were pooled  
148 from the children's files in each of the countries. The DHS Program has conducted over  
149 400 surveys in over 90 developing countries around the world since 1984 every five years<sup>23</sup>.  
150 The program implements cross-sectional surveys to gather nationally-representative data,  
151 analyze and disseminate accurate information on important demographic and health  
152 indicators spanning population, nutrition, and diseases. For all surveys, standardized  
153 protocols designed for each target group including children, women, and men at the  
154 household level are employed to allow for cross-national comparisons. Stratified two-  
155 stage sampling involving first, the listing of enumeration areas and selection of clusters,  
156 and then a random selection of households in each cluster. The detailed sampling method  
157 can be found in a previous study<sup>24</sup>. The dataset is freely available for download at:  
158 <https://dhsprogram.com/data/available-datasets.cfm><sup>25</sup>. The Strengthening Reporting of  
159 Observational Studies in Epidemiology (STROBE) guidelines were followed in writing the  
160 manuscript<sup>26</sup>.

### 161 **Study Variables**

#### 162 **Outcome Variable**

163 The outcome variable considered in this study is derived from three child anthropometric  
164 variables including stunting (height-for-age z-scores); underweight (weight-for-age z-  
165 scores) and wasting (weight-for-height z-scores). The DHS (2021) specifies categorization  
166 for each of these variables following the WHO child growth standard. Each of the three  
167 variables we coded into "0" for "Normal" and "1" for "Stunting", "underweight" and  
168 "Wasting" respectively.  
169  
170

1  
2  
3 169 These three variables were then added to generate the outcome variable “Co-existed  
4 170 undernutrition” with scores (discrete) ranging from 0 to 3 where 0 implies “Normal”, that  
5 171 is, children with none of the three conditions; 1 implies “Single burden”, that is, the child  
6 172 suffers from one of the three conditions; 2 indicates that child suffers from “Two burdens”  
7 173 out of the three; and 3 shows “Co-existed”, that is, the child suffers from all three  
8 174 conditions of undernutrition. For parsimony, children who suffered from “Single burden”  
9 175 and those who suffered from “Two burdens” were added resulting in the variable “Co-  
10 176 existed undernutrition” with three response categories: 0=Normal; 1=One or two burdens;  
11 177 and 3=co-existed.

## 15 178 **Independent Variables**

16  
17 179 Several risk factors spanning compositional to contextual factors have been associated  
18 180 with child undernutrition. The relevant biosocial characteristics and sociocultural factors  
19 181 related to the child, mother, household head and the household together form  
20 182 compositional factors<sup>27,28</sup>. Factors that describe location or “place-based” variables are  
21 183 contextual factors<sup>20,27,29,30</sup>. The relevant compositional factors considered include the age  
22 184 of the child; sex of the child; birth order of child; perceived size at birth; mother’s age;  
23 185 educational attainment; working status; antenatal visits during pregnancy; postnatal  
24 186 check within 2 months; and place of delivery. At the household level, relevant variables  
25 187 included are the wealth status; the age of household head; sex of household head (male  
26 188 and female); access to electricity; and access to media which was derived from the three  
27 189 variables “access to television”, “radio” and “newspaper”. Household basic needs  
28 190 including the type of toilet facility (re-coded into “improved” and unimproved”<sup>29</sup>; source  
29 191 of drinking water (re-coded as “improved” and “unimproved”<sup>29</sup>, and type of household  
30 192 cooking fuel (re-coded into “clean” and “unclean”<sup>29,31</sup> are also considered. The contextual  
31 193 factors considered are urbanicity and the country of origin of the participant.

## 36 194 **Data Analyses**

37  
38 195 The statistical analysis of the data was performed using the Stata SE software version 14.2.  
39 196 The “svyset” command was first used to declare the data as survey data to prevent the  
40 197 potential effects of the complex sampling techniques on the analyses. The sample weight  
41 198 variable in the DHS was used to provide weighted samples in the analyses. To understand  
42 199 the distributions of the variables, the data were summarized and presented in tables using  
43 200 descriptive statistics (frequencies, weighted percentages, and 95% confidence intervals  
44 201 (CIs) of percentages). We further integrated the data into a GIS environment and  
45 202 presented the distribution of key variables across the study countries and geographic  
46 203 regions in map images (Figure 1 and Figure 2). This approach enhances the visualization of  
47 204 the data and understanding of the context of the study. The associations between the co-  
48 205 existence of undernutrition and each of the risk factors considered were assessed using  
49 206 the chi-square test of independence, with results presented in a contingency table. The  
50 207 risk factors as independent variables were then subjected to collinearity diagnosis tests,  
51 208 including Variance Inflation Factors (VIF), Square VIF, Tolerance, and R-squared. This was  
52 209 done to ascertain whether the independent variables were actually “independent”, that  
53 210 is, are not correlated with one another and will not share variance in the outcome variable.  
54 211 Results from the multicollinearity diagnoses test (See Appendix 2) show that the variables  
55 212 were not correlated (Mean VIF=1.26; Maximum VIF=1.71; Minimum VIF=1.02). To determine

213 the risk factors associated with the co-existence of undernutrition, a multinomial  
214 regression model was implemented. All statistical tests were conducted at  $p < 0.05$ .

### 215 **Ethical Approval**

216 This study used secondary data from the DHS Program. Since we neither interacted  
217 directly nor indirectly with the study participants, there was no need for ethical approval.  
218 Details on the ethical considerations of the DHS Program could be found at  
219 [https://dhsprogram.com/methodology/Protecting-the-Privacy-of-DHS-Survey-  
220 Respondents.cfm](https://dhsprogram.com/methodology/Protecting-the-Privacy-of-DHS-Survey-Respondents.cfm).

### 222 **Patient and public involvement**

223 Patients and the public were not involved in the design and conduct of this research

### 224 **Results**

#### 225 ***Distribution of sample characteristics***

226 The study included a total of 127,487 under-five children. It is found that most (30.87%) of  
227 the children were less than a year (Table 1). With regards to sex, both males and females  
228 constituted approximately half of the sample. A majority of the children (92.87%) were  
229 born to mothers aged between 20 to 49 years while only 7.13% were born to mothers aged  
230 15 to 19 years. In terms of education, most (41.82%) of the children were born to mothers  
231 with no formal education. Only 3.10% of the children were born to a mother with a higher  
232 level of educational attainment. Further, 42.1% of the children were born in poor  
233 households while 37.21% were born in rich households. More than half (57.53%) of the  
234 children lived in a household with unimproved toilet facilities. However, most (65.63%) of  
235 the children lived in households with access to improved drinking water sources. Similarly,  
236 a majority (89.76%) of the children lived in households using clean cooking fuel (Table 1).

237 As shown in Appendix 2, the prevalence of co-existence of stunting, underweight, and  
238 underweight varied across countries and sub-regions, with the highest and lowest  
239 prevalence of co-existence of stunting, underweight, and wasting as Rwanda (6.17%) and  
240 South Africa (0.18%) respectively (Figure 1). In terms of sub-region, the highest prevalence  
241 of co-existence of stunting, underweight, and wasting was observed in Western Africa  
242 (3.11%) and the lowest prevalence in Southern Africa (0.88%) (Figure 2).

243 Significant associations between all the independent variables and co-existence of  
244 stunting, wasting, and underweight, except maternal age and age of household head,  
245 were identified (Table 2).

246 \*\*\*Table 1\*\*\*

247

248 \*\*\*Figure 1\*\*\*

249 \*\*\*Figure 2\*\*\*

250 \*\*\*Table 2\*\*\*

### 251 ***Risk factors of the co-existence of stunting, wasting and underweight***

252 Table 3 shows the results of the multinomial regression analysis of the risk factors of co-  
253 existence of dimensions of undernutrition (stunting, underweight, and wasting) among

1  
2  
3 254 children under five years in the SSA. Age of child, size of the child at birth, sex of the child,  
4 255 birth order, educational level, maternal age, ANC attendance, place of delivery, source of  
5 256 drinking water, sex of household head, wealth index, access to electricity and place of  
6 257 residence were associated with one or two dimensions of undernutrition. See Appendix 3  
7 258 for country-level risk of co-existence of stunting, wasting, and underweight.

8  
9  
10 259 Regarding the co-existence of the three dimensions of undernutrition (stunting,  
11 260 underweight, and wasting), age of the child, sex of the child, perceived birth size, maternal  
12 261 educational attainment, working status, antenatal visits during pregnancy, place of  
13 262 delivery, wealth status, access to media, and type of toilet facility were found to be  
14 263 significant risk factors (Table 3).

15  
16  
17 264 **\*\*\*Table 3\*\*\***

## 18 265 **DISCUSSION**

19  
20 266 The study investigated the risk factors of the co-existence of stunting, underweight, and  
21 267 wasting among children under age 5 in sub-Saharan Africa using data from DHS conducted  
22 268 in 31 countries between 2010 and 2019. The study found that the countries with the highest  
23 269 and lowest prevalence of co-existence of stunting, underweight, and wasting were Benin  
24 270 and Gambia respectively. In terms of geographic region, the highest prevalence of co-  
25 271 existence of stunting, underweight, and wasting was observed in Western Africa and the  
26 272 lowest prevalence in Southern Africa. The disparities in the prevalence among the  
27 273 countries and geographical regions could be attributed to the nutritional practices and  
28 274 beliefs practised in the countries and geographical regions. Differences in the health  
29 275 policies provided by governments in the various countries could also account for the  
30 276 disparities noted. This finding implies that countries that have high prevalence should take  
31 277 critical lessons from the countries that are doing well regarding the implementation of  
32 278 nutritional policies and interventions (e.g., increasing dietary supplementation, increasing  
33 279 dietary diversity) that target the reduction of the co-existence of stunting, underweight,  
34 280 and wasting among children under age 5 in sub-Saharan Africa<sup>2</sup>.

35  
36  
37  
38  
39 281 Similar to previous studies<sup>1,3</sup>, this study found that children aged 1 year, 2 years, and 3 years  
40 282 were at greater risk of having co-existence of all the three forms of undernutrition  
41 283 compared to those aged 0. A plausible reason for this finding could be that as children  
42 284 grow their energy needs also increase<sup>1</sup>, increasing their risk of having all three nutritional  
43 285 conditions. Alternatively, since these nutritional conditions may manifest after long  
44 286 durations of improper nutritional practices or undernutrition<sup>1,3</sup>, older children may be at  
45 287 higher risk of having all three nutritional conditions. The finding suggests that  
46 288 complementary foods given to children as they grow are inadequate. To reduce the risk of  
47 289 co-existence of stunting, underweight, and wasting among under 5 children, the health  
48 290 sectors in the various countries should invest heavily in providing adequate  
49 291 complementary feeding to this category of children.

50  
51  
52  
53 292 Corroborating the findings of other studies<sup>1,3,32,33</sup>, this study also found that children who  
54 293 were females were less likely to have a co-existence of the three dimensions of  
55 294 undernutrition compared to their male counterparts. An acceptable explanation for this  
56 295 finding could be the biological variations in morbidity between males and females at that  
57 296 young age<sup>3</sup>. It is also possible that since male children have higher birth weight compared  
58 297 to females, they require more energy<sup>1,34</sup>, which increases the risk of males having all three



298 nutritional conditions. Moreover, male children are perceived to be hungrier than females,  
299 therefore breastfeeding alone could be insufficient or inadequate<sup>3,35</sup>, increasing their  
300 susceptibility to having the three nutritional conditions. The finding suggests that male  
301 children should be given critical attention in the development and implementation of  
302 nutritional programs (e.g., dietary supplementation) to mitigate the co-existence of  
303 stunting, underweight, and wasting among these male children under 5 years.

304 The study found that the risk of co-existence of the three dimensions of undernutrition  
305 was higher among children with the average size at birth and small size at birth compared  
306 to children with large size at birth. It has been proven that undernutrition in children is  
307 partly influenced by maternal nutrition practices. Hence, mothers' appropriate nutritional  
308 behaviours during the prenatal and postnatal periods are key to improve child growth.  
309 Conversely, maternal undernutrition causes low maternal BMI, which in turn affects the  
310 foetus to poor development often associated with small birth size and low birth  
311 weight<sup>1,3,21,36</sup>. This finding indicates that mothers of children under 5 should continuously  
312 be educated on the best nutritional practices such as exclusive breastfeeding,  
313 complementary feeding, and dietary supplementation. These strategies will help  
314 ameliorate the risk of acquiring health conditions associated with undernutrition among  
315 children under 5.

316 The risk of co-existence of the three dimensions was higher among children whose  
317 mothers had no education and primary education compared to those whose mothers had  
318 higher education. Mothers who have attained higher education are better informed about  
319 improved childcare practices<sup>37</sup>, are more empowered to make health decisions<sup>38</sup>, practice  
320 good personal hygiene<sup>38</sup>, are more likely to use the health facility<sup>39</sup>, proper feeding  
321 practices<sup>36</sup> and childcare in times of illness<sup>36,40</sup>. This finding suggests that mothers with no  
322 formal or little education are neglected in nutritional programs that help to eliminate  
323 stunting, underweight, and wasting. Hence, they should be given the needed  
324 consideration to deal with this persistent health issue.

325 This study also found that the risk of co-existence of the three dimensions was higher  
326 among children whose mothers were not working compared to those whose mothers  
327 were working. Women's employment status indicates their ability to afford proper  
328 nutritional products and health care services<sup>36,40</sup>. Therefore, if mothers are not employed,  
329 the children become highly susceptible or vulnerable because mothers are unlikely to meet  
330 their nutritional needs or requirements. Mothers with children under 5 with such  
331 disadvantaged backgrounds should be given subsidies on children's nutritional products  
332 and perhaps, free access to health care services by governmental and non-governmental  
333 organizations. This step will be significant in reducing the risks of the co-existence of  
334 stunting, underweight, and wasting among children under 5 years.

335 The risk of co-existence of the three dimensions was higher among children whose  
336 mothers had no antenatal visits during pregnancy compared to those whose mothers had  
337 antenatal visits during pregnancy. Specifically, mothers who attend antenatal services are  
338 usually educated on the best practices of nutrition and general healthcare, which hitherto  
339 would not be known by these mothers<sup>38</sup>. Therefore, mothers who did not have antenatal  
340 visits may lack some knowledge about proper nutritional practices, increasing their  
341 children's risk of having these undernutrition-related challenges. Regular antenatal visits  
342 could reduce children's risk of stunting, being underweight, and wasting, therefore,

343 mothers should continuously be encouraged to go for antenatal care services in their  
344 countries.

345 Children who were delivered at home compared to children who were delivered at a health  
346 facility were found to have a higher risk of co-existence of the three dimensions. Since  
347 mothers who deliver at home do not receive any expert nutritional advice from a qualified  
348 health practitioner<sup>37</sup>, the children of such mothers are at higher risk of having these  
349 conditions because of poor and/ or inadequate dietary practices. This finding shows that  
350 facility delivery may help reduce the risk of co-existence of stunting, underweight, and  
351 wasting among children under 5. Therefore, mothers should regularly be educated on the  
352 need to opt for facility delivery because of its positive implications on children's growth.

353 The risk of co-existence of the three dimensions was higher among children whose  
354 mothers were poor and had middle wealth status compared to those whose mothers were  
355 rich. Usually, mothers who have an average income may lack the financial capacity to feed  
356 themselves and their children properly and adequately<sup>3,17,36</sup>, increasing the children's risk  
357 of being stunted, underweight or wasted. Likewise, mothers from poor and middle wealth  
358 quintiles may not have access to quality nutritional products and health care systems<sup>36,40</sup>,  
359 making their children more susceptible to having all three nutritional conditions. This  
360 finding implies that women from poor economic backgrounds should be assisted with  
361 nutritional products and services to facilitate the reduction in the risks of the co-existence  
362 of stunting, underweight, and wasting among children under 5.

363 The risk of co-existence of the three dimensions was higher among children whose  
364 mothers had no access to media compared to those whose mothers had access to media.  
365 Since many people are educated about proper nutritional practices through the mass  
366 media<sup>10,11</sup>, mothers who have no access to the media may lack certain important nutritional  
367 information they need. This information gap could increase children's risk of having all  
368 three nutritional conditions through improper dietary practices from their mothers. For  
369 instance, mothers' access to appropriate information from the media would help them  
370 decide on which proper diets or food commodities are readily available on market for their  
371 children. More pragmatic ways of reaching mothers who have no access to media are  
372 encouraged. Regular outreach or sensitization programs to target women without access  
373 to media for example could help in reducing the risks of the co-existence of stunting,  
374 underweight, and wasting among children under 5 years.

375 Children whose mothers had unimproved toilet facilities were found to have a higher risk  
376 of co-existence of the three dimensions of child undernutrition compared to those whose  
377 mothers had improved toilet facilities. Insanitary or unhygienic toilet conditions may  
378 increase mother-child-environment interactions that may result in increased exposure to  
379 childhood diseases and other opportunistic infections (e.g., diarrhoeal episodes, fever)  
380 either through consumption of contaminated foods, drinking water or poor  
381 environmental sanitation<sup>21</sup>. These conditions have been shown to cause growth  
382 retardation in children. Government and non-governmental organizations should support  
383 the provision of improved household toilet facilities for poorer communities to help  
384 minimize the risks of the co-existence of child undernutrition indicators.

385 Children from Burkina Faso, Burundi, Chad, Nigeria, and Rwanda had a higher risk of having  
386 the co-existence of the three dimensions compared to those from Angola. On the other

hand, countries such as Benin, Cameroon, Congo, Gabon, Ghana, Guinea, Kenya, Lesotho, Malawi, Senegal, Zambia, Uganda, Tanzania, Sierra Leone, Zimbabwe, and South Africa had a lower risk among their children having co-existence of the three undernutrition dimensions. The sub-regional and country-specific variations in socio-economic, agro-ecological and geographical characteristics may strongly influence the nutritional status of children because of inadequate food supplies, limited access to arable land for agriculture, unfavourable climatic conditions (e.g., desertification), rapid population growth, and increasing cost of living may determine food access, availability and production in studied countries in SSA<sup>41,42</sup>. Governmental priorities should intensify efforts to minimize the risk of co-existence of stunting, underweight, and wasting among children under age 5 with sound socio-economic and sustainable human capital development.

## 398 **Conclusions and implications**

399 The study investigated the risk factors of the co-existence of stunting, underweight, and  
400 wasting among children under age 5 in sub-Saharan Africa using data from DHS conducted  
401 in 31 countries between 2010 and 2019. The study found that the prevalence of co-  
402 existence of stunting, underweight, and wasting ranged from 0.58 % in the Gambia to  
403 12.14% in Benin. The study also found that the prevalence of co-existence of stunting,  
404 underweight, and wasting was high in Western Africa (41.78%) but low in Southern Africa  
405 (5.3%). The significant findings show that the disadvantaged have more risks of the co-  
406 existence of stunting, underweight, and wasting among under 5 children in selected SSA  
407 countries. These findings demonstrate the urgent need for consideration of the co-  
408 existence of stunting, wasting and underweight among under-five children in policy design  
409 and programming of interventions to eradicate child malnutrition in SSA. In the short-term,  
410 national-level policies and interventions needs to be well-tailored considering the  
411 compositional characteristics including child's age, sex, birth size; maternal education,  
412 working status, place of delivery, antenatal visit; and household's wealth status, access to  
413 media and improved toilet facility are required. For instance, such programs could be  
414 geared towards improving females' access to education, reducing unemployment,  
415 expanding access to the media and using it to promote education on the need for  
416 antenatal care. In the long-term, regional policies and coordinated interventions among  
417 governments of SSA countries need to be designed to address the disparate prevalence  
418 of the co-existence of stunting, wasting and underweight in under-five children across the  
419 four geographic regions. The implementation of these at the local-level should consider  
420 rural-urban differences in the prevalence of the condition and the risk factors elicited.

421

422 **Acknowledgements:** The authors thank the MEASURE DHS project for their support and  
423 free access to the original data

424 **Contributors:** IA and BOA developed the study concept. IA performed the data analysis.  
425 AS, ED, JBF, JEH, RGA, BA, CA and BOA drafted and revised the manuscript critically for its  
426 intellectual content. All authors read and approved the final manuscript. AS had the final  
427 responsibility to submit the manuscript.

428

429 **Funding:** This research received no specific grant from any funding agency in the public,  
430 commercial or not-for-profit sectors

431 **Competing interests:** None

432

433 **Patient consent for publication:** No consent to publish was needed for this study  
434 as we did not use any details, images or videos related to individual participants. In  
435 addition, data used are available in the public domain.

436

437 **Ethics Approval and consent to participate**

438 This study used secondary data from the DHS Program. Since we neither interacted  
439 directly nor indirectly with the study participants, there was no need for ethical approval.  
440 Details on the ethical considerations of the DHS Program could found at  
441 [https://dhsprogram.com/methodology/Protecting-the-Privacy-of-DHS-Survey-](https://dhsprogram.com/methodology/Protecting-the-Privacy-of-DHS-Survey-Respondents.cfm)  
442 [Respondents.cfm](https://dhsprogram.com/methodology/Protecting-the-Privacy-of-DHS-Survey-Respondents.cfm).

443

444 **Provenance and peer review:** Not commissioned; externally peer reviewed.

445

446 **Data availability statement:** Data are available in a public, open access repository.

447

## 448 **References**

- 449 1. Amare ZY, Ahmed ME, Mehari AB. Determinants of nutritional status among  
450 children under age 5 in Ethiopia: further analysis of the 2016 Ethiopia demographic  
451 and health survey. *Global Health* 2019;15(1):1–11.
- 452 2. Anin SK, Saaka M, Fischer F, Kraemer A. Association between Infant and Young  
453 Child Feeding (IYCF) Indicators and the Nutritional Status of Children (6–23  
454 Months) in Northern Ghana. *Nutrients* 2020; 12, 2565.  
455 <https://doi.org/10.3390/nu12092565>
- 456 3. Madiba S, Chelule PK, Mokgatle MM. Attending informal preschools and daycare  
457 centers is a risk factor for underweight, stunting and wasting in children under the  
458 age of five years in underprivileged communities in South Africa. *International*  
459 *Journal of Environmental Research and Public Health* 2019; 16(14), 2589.
- 460 4. Yalew BM, Amsalu F, Bikes D. Prevalence and factors associated with stunting,  
461 underweight and wasting: a community based cross sectional study among  
462 children age 6-59 months at Lalibela Town, Northern Ethiopia. *J Nutr Disorders Ther*  
463 2014; 4(147), 2161-0509.
- 464 5. WHO. Nutrition Landscape Information System (NLIS) Country Profile Indicators:  
465 Interpretation Guide; World Health Organization: Geneva, Switzerland, 2010.
- 466 6. Akombi BJ, Agho KE, Hall JJ, Wali N, Renzaho A, Merom D. Stunting, wasting and  
467 underweight in sub-Saharan Africa: a systematic review. *International Journal of*  
468 *Environmental Research and Public Health* 2017; 14(8), 863.
- 469 7. WHO. Global nutrition targets 2025: policy brief series (WHO/NMH/NHD/14.2).  
470 Geneva: World Health Organization; 2014.  
471 [https://apps.who.int/iris/bitstream/handle/10665/149018/WHO\\_NMH\\_NHD\\_14.2\\_e](https://apps.who.int/iris/bitstream/handle/10665/149018/WHO_NMH_NHD_14.2_eng.pdf)  
472 [ng.pdf](https://apps.who.int/iris/bitstream/handle/10665/149018/WHO_NMH_NHD_14.2_eng.pdf)
- 473 8. Black RE, Victora CG, Walker SP, Bhutta ZA, Christian P, De Onis M, Ezzati M,  
474 Grantham-McGregor S, Katz J, Martorell R, Uauy R, Maternal and Child Nutrition  
475 Study Group. Maternal and child undernutrition and overweight in low-income and  
476 middle-income countries. *The lancet* 2013; 382(9890), 427-451.

1  
2  
3  
4  
5  
6  
7  
8  
9  
10  
11  
12  
13  
14  
15  
16  
17  
18  
19  
20  
21  
22  
23  
24  
25  
26  
27  
28  
29  
30  
31  
32  
33  
34  
35  
36  
37  
38  
39  
40  
41  
42  
43  
44  
45  
46  
47  
48  
49  
50  
51  
52  
53  
54  
55  
56  
57  
58  
59  
60

9. World Health Organization. Levels and trends in child malnutrition: key findings of the 2019 edition (No. WHO/NMH/NHD/19.20). World Health Organization. 2019.
10. De Onis M, Onyango A, Borghi E, Siyam A, Blössner M, Lutter C. Worldwide implementation of the WHO child growth standards. *Public Health Nutrition* 2012; 15(9), 1603-1610.
11. De Onis M, Blössner M, Borghi E. Prevalence and trends of stunting among pre-school children, 1990–2020. *Public Health Nutrition* 2012; 15(1), 142-148.
12. World Health Organization. Community-based management of severe acute malnutrition: a joint statement by the World Health Organization, the World Food Programme, the United Nations System Standing Committee on Nutrition and the United Nations Children's Fund. 2007.
13. UNICEF. Levels and trends in child malnutrition, United Nations Children's fund (UNICEF), World Health Organization, International Bank for Reconstruction and Development/The World Bank. Levels and trends in child malnutrition: key findings of the 2019 edition of the joint child malnutrition estimates. Geneva: World Health Organization; 2019 Licence: CC BY-NC-SA 3.0 IGO; 2019.
14. Central Statistical Agency (CSA)[Ethiopia] and ICF. Ethiopia demographic and health survey, Addis Ababa, Ethiopia and Calverton, Maryland, USA. 2016.
15. Yaya S, Uthman OA, Ekholuenetale M, Bishwajit G, Adjiwanou V. Effects of birth spacing on adverse childhood health outcomes: evidence from 34 countries in sub-Saharan Africa. *J Matern & Neonatal Med* 2020;33(20):3501–8.
16. Armah FA, Ekumah B, Yawson DO, Odoi JO, Afitiri A, Nyieku FE, et al. Predictive Probabilities of Access to Clean Cooking: Evidence from the Demographic and Health Surveys in 31 Countries in Sub-Saharan Africa. 2019;12(3):320–2.
17. Mamabolo RL, Alberts M, Steyn NP, Delemarre-van de Waal HA, Levitt NS. Prevalence and determinants of stunting and overweight in 3-year-old black South African children residing in the Central Region of Limpopo Province, South Africa. *Public Health Nutrition* 2005; 8(5), 501-508.
18. Novignon J, Aboagye E, Agyemang OS, Aryeetey G. Socioeconomic-related inequalities in child malnutrition: evidence from the Ghana multiple indicator cluster survey. *Health Economics Review* 2015; 5(1), 1-11.
19. Khara T, Mwangome M, Ngari M, Dolan C. Children concurrently wasted and stunted: A meta-analysis of prevalence data of children 6–59 months from 84 countries. *Maternal & child nutrition*. 2018 Apr;14(2):e12516.
20. Boah M, Azupogo F, Amporfro DA, Abada LA. The epidemiology of undernutrition and its determinants in children under five years in Ghana. *Plos one*. 2019 Jul 31;14(7):e0219665.
21. Khan RE, Raza MA. Determinants of malnutrition in Indian children: new evidence from IDHS through CIAF. *Quality & Quantity*. 2016 Jan 1;50(1):299-316.
22. Angood C, Khara T, Dolan C, Berkley JA, WaSt Technical Interest Group. Research priorities on the relationship between wasting and stunting. *PloS one*. 2016 May 9;11(5):e0153221.
23. Corsi DJ, Neuman M, Finlay JE, Subramanian SV. Demographic and health surveys: a profile. *International Journal of Epidemiology* 2012; 41(6), 1602-1613.

- 1  
2  
3 521 24. Aliaga A, Ruilin R. Cluster optimal sample size for demographic and health surveys.  
4 522 In 7th International Conference on Teaching Statistics–ICOTS (Vol. 7, pp. 2-7). 2006.  
5 523 25. DHS. DHS data source <https://dhsprogram.com/data/available-datasets.cfm>  
6 524 26. Von Elm E, Altman DG, Egger M, Pocock SJ, Gøtzsche PC, Vandenbroucke JP, Strobe  
7 525 Initiative. The Strengthening the Reporting of Observational Studies in  
8 526 Epidemiology (STROBE) Statement: guidelines for reporting observational  
9 527 studies. *International journal of surgery*. 2014; 12(12), 1495-1499.  
10 528 27. Collins J, Ward BM, Snow P, Kippen S, Judd F. Compositional, Contextual, and  
11 529 Collective Community Factors in Mental Health and Well-Being in Australian Rural  
12 530 Communities. *Qualitative Health Research* 2017; 27(5), 677–687.  
13 531 <https://doi.org/10.1177/1049732315625195>  
14 532 28. Pol LG, Thomas RK. The demography of health and health care. Springer Science &  
15 533 Business Media. 2001.  
16 534 29. Armah FA, Ekumah B, Yawson DO, Odoi JO, Afitiri AR, Nyieku F.E. Access to  
17 535 improved water and sanitation in sub-Saharan Africa in a quarter century. *Heliyon*  
18 536 2018; 4(11), e00931. <https://doi.org/10.1016/j.heliyon.2018.e00931>  
19 537 30. Ross CE, Mirowsky J. Neighborhood socioeconomic status and health: context or  
20 538 composition? *City & Community* 2008; 7(2), 163–179.  
21 539 31. Amegah AK, Boachie J, Näyhä S, Jaakkola JJK. Association of biomass fuel use with  
22 540 reduced body weight of adult Ghanaian women. *J Expo Sci Environ Epidemiol* 2019;1.  
23 541 32. Alemayehu M, Tinsae F, Hailelassie K, Seid O, Gebregziabher G, Yebyo H.  
24 542 Undernutrition status and associated factors in under-5 children, in Tigray,  
25 543 Northern Ethiopia. *Nutrition* 2015; 31(7-8), 964-970.  
26 544 33. Mya KS, Kyaw AT, Tun T. Feeding practices and nutritional status of children age 6-  
27 545 23 months in Myanmar: A secondary analysis of the 2015-16 Demographic and  
28 546 Health Survey. *PLoS one* 2019; 14(1), e0209044.  
29 547 34. Bork KA, Diallo A. Boys are more stunted than girls from early infancy to 3 years of  
30 548 age in rural Senegal. *The Journal of Nutrition* 2017; 147(5), 940-947.  
31 549 35. Tumilowicz A, Habicht JP, Pelto G, Pelletier DL. Gender perceptions predict sex  
32 550 differences in growth patterns of indigenous Guatemalan infants and young  
33 551 children. *The American Journal of Clinical Nutrition* 2015; 102(5), 1249-1258.  
34 552 36. Mukabutera A, Thomson DR, Hedt-Gauthier BL, Basinga P, Nyirazinyoye L, Murray  
35 553 M. Risk factors associated with underweight status in children under five: an  
36 554 analysis of the 2010 Rwanda Demographic Health Survey (RDHS). *BMC Nutrition*  
37 555 2016; 2(1), 1-12.  
38 556 37. Oyekale AS. Factors explaining acute malnutrition among under-five children in  
39 557 Sub-Sahara Africa (SSA). *Life Sci J* 2012; 9, 2101-7.  
40 558 38. Keats A. Women's schooling, fertility, and child health outcomes: Evidence from  
41 559 Uganda's free primary education program. *Journal of Development Economics*  
42 560 2018; 135, 142-159.  
43 561 39. Sunguya BF, Poudel KC, Mlunde LB, Urassa DP, Yasuoka J, Jimba M. Poor nutrition  
44 562 status and associated feeding practices among HIV-positive children in a food  
45 563 secure region in Tanzania: a call for tailored nutrition training. *PLoS one* 2014; 9(5),  
46 564 e98308.  
47 565 40. Iannotti LL, Dulience SJL, Green J, Joseph S, François J, Antenor ML, ... Nickerson  
48 566 NM. Linear growth increased in young children in an urban slum of Haiti: a

- 1  
2  
3 567 randomized controlled trial of a lipid-based nutrient supplement. *The American*  
4 568 *Journal of Clinical Nutrition* 2014; 99(1), 198-208.
- 5 569 41. Lopriore C, Muehlhoff E. Food security and nutrition trends in West Africa—  
6 570 Challenges and the way forward. In Proceedings of the 2nd International Workshop  
7 571 on Food-based Approaches for a Healthy Nutrition, Ouagadougou, Burkina. 2003;  
8 572 23–28.
- 9 573 42. Salami A, Kamara AB, Brixiova Z. Smallholder Agriculture in East Africa: Trends,  
10 574 Constraints and Opportunities; African Development Bank: Tunis, Tunisia, 2010.

11 575

12 576

13 577

14 578

15 579

16 580

17 581

## Figures

18 582 **Figure 1:** Percentage distribution of co-existence of stunting, underweight, and  
19 583 wasting (SUW) in children from the 31 study countries in SSA

20 584 **Figure 2:** Percentage distribution of co-existence of stunting, underweight, and  
21 585 wasting (SUW) in children by regions of SSA

22 586

23 587

24 588

25 589

26 590

27 591

28 592

29 593

30 594

31 595

32 596

33 597

34

35

36

37

38

39

598

599 Tables

600 Table 1: Distribution of the relevant variables and characteristics of under-five children in SSA

601

| Variable                             | %     | Variable                 | %     |
|--------------------------------------|-------|--------------------------|-------|
| Age of child                         |       | Urbanicity               |       |
| 0                                    | 30.87 | Urban                    | 33.21 |
| 1                                    | 28.42 | Rural                    | 66.79 |
| 2                                    | 20.22 | Place of delivery        |       |
| 3                                    | 12.40 | Home                     | 31.33 |
| 4                                    | 8.09  | Health facility          | 67.51 |
| Sex of child                         |       | Other                    | 1.16  |
| Male                                 | 50.47 | Wealth status            |       |
| Female                               | 49.53 | Poor                     | 42.41 |
| Birth order                          |       | Middle                   | 20.28 |
| 1                                    | 19.52 | Rich                     | 37.31 |
| 2 to 4                               | 48.09 | Age of household head    |       |
| 5 and above                          | 32.39 | Young-adults             | 43.08 |
| Perceived size at birth              |       | Middle-aged adults       | 43.76 |
| Large                                | 33.71 | Old-aged adults          | 13.16 |
| Average                              | 49.74 | Sex of household head    |       |
| Small                                | 16.54 | Male                     | 79.77 |
| Mother's characteristics             |       | Female                   | 20.23 |
| Maternal age                         |       | Access to electricity    |       |
| 15-19                                | 7.13  | No                       | 69.20 |
| 20-49                                | 92.87 | Yes                      | 30.80 |
| Educational attainment               |       | Type of toilet facility  |       |
| No education                         | 41.82 | Improved                 | 42.47 |
| Primary                              | 31.26 | Unimproved               | 57.53 |
| Secondary                            | 23.82 | Source of drinking water |       |
| Higher                               | 3.10  | Improved                 | 65.63 |
| Working status                       |       | Unimproved               | 34.37 |
| No                                   | 35.49 | Type of cooking fuel     |       |
| Yes                                  | 64.51 | Clean                    | 89.76 |
| Antenatal visits during pregnancy    |       | Unclean                  | 10.24 |
| No                                   | 10.76 | Geographic region        |       |
| Yes                                  | 89.24 | Western                  | 41.78 |
| Postnatal check within 2 months      |       | Eastern                  | 32.84 |
| No                                   | 58.49 | Central                  | 20.08 |
| Yes                                  | 41.51 | South Africa             | 5.30  |
| Access to media (tv/radio/newspaper) |       |                          |       |
| Yes                                  | 35.33 |                          |       |
| No                                   | 64.67 |                          |       |

(N=127,487)

602



603

604 Table 2: Prevalence and association of the co-existence of stunting, underweight and wasting with independent variables

| Variable                                    | Co-existed<br>Weighted %<br>(95% CI) | Variable                                  | Co-existed<br>Weighted % (95%<br>CI) | Variable                    | Co-existed<br>Weighted % (95% CI) |
|---------------------------------------------|--------------------------------------|-------------------------------------------|--------------------------------------|-----------------------------|-----------------------------------|
| <b>Age of child (p&lt;0.001)</b>            |                                      | <b>Place of delivery (p&lt;0.001)</b>     |                                      | <b>Country (p&lt;0.001)</b> |                                   |
| <1                                          | 1.75 (1.6-1.9)                       | Home                                      | 4.36 (4.2-4.6)                       | Angola                      | 2.46 (2.1-2.8)                    |
| 1                                           | 4.44 (4.2-4.7)                       | Health facility                           | 1.96 (1.9-2.1)                       | Benin                       | 2.04 (1.8-2.2)                    |
| 2                                           | 3.01 (2.8-3.2)                       | Other                                     | 2.45 (1.7-3.3)                       | Burkina Faso                | 5.31 (4.9-5.8)                    |
| 3                                           | 1.62 (1.4-1.8)                       | <b>Wealth status (p&lt;0.001)</b>         |                                      | Burundi                     | 3.76 (3.2-4.4)                    |
| 4                                           | 1.33 (1.1-1.6)                       | Poor                                      | 3.46 (3.3-3.6)                       | Cameroon                    | 1.27 (0.9-1.7)                    |
| <b>Sex of child (p&lt;0.001)</b>            |                                      | Middle                                    | 2.74 (2.5-2.9)                       | Chad                        | 5.86 (5.2-6.5)                    |
| Male                                        | 3.43 (3.3-3.6)                       | Rich                                      | 1.86 (1.7-2.0)                       | Comoros                     | 1.98 (1.3-2.9)                    |
| Female                                      | 1.99 (1.9-2.1)                       | <b>Age of household head (p = 0.2760)</b> |                                      | Congo                       | 0.98 (0.7-1.5)                    |
| <b>Birth order (p&lt;0.001)</b>             |                                      | Young-adults                              | 2.65 (2.5-2.8)                       | Cote d'Ivoire               | 2.28 (1.7-3.0)                    |
| 1                                           | 2.25 (2.1-2.4)                       | Middle-aged adults                        | 2.76 (2.6-2.9)                       | DR Congo                    | 2.66 (2.2-3.2)                    |
| 2 to 4                                      | 2.56 (2.4-2.7)                       | Old-aged adults                           | 2.8 (2.6-3.1)                        | Ethiopia                    | 3.64 (3.2-4.1)                    |
| 5 and above                                 | 3.23 (3.1-3.4)                       | <b>Sex of household head (p&lt;0.001)</b> |                                      | Gabon                       | 0.63 (0.3-1.0)                    |
| <b>Perceived size at birth (p&lt;0.001)</b> |                                      | Male                                      | 2.82 (2.7-2.9)                       | The Gambia                  | 3.61 (2.4-5.2)                    |
| Large                                       | 1.78 (1.7-1.9)                       | Female                                    | 2.33 (2.1-2.5)                       | Ghana                       | 1.37 (0.9-2.0)                    |
| Average                                     | 2.6 (2.5-2.7)                        | <b>Access to electricity (p&lt;0.001)</b> |                                      | Guinea                      | 2.26 (1.7-2.9)                    |
| Small                                       | 4.98 (4.7-5.3)                       | No                                        | 3.21 (3.1-3.3)                       | Kenya                       | 0.94 (0.7-1.2)                    |

|                                 |                                                       |                                             |                |                                        |
|---------------------------------|-------------------------------------------------------|---------------------------------------------|----------------|----------------------------------------|
| <b>Maternal age (P = 0.080)</b> | Yes                                                   | 1.61 (1.5-1.7)                              | Lesotho        | 0.86 (0.7-1.0)                         |
|                                 | <b>Access to media</b>                                |                                             |                |                                        |
| 15-19                           | 2.78 (2.5-3.1)                                        | <b>(tv/radio/newspaper) (p&lt;0.001)</b>    | Liberia        | 2.37 (1.7-3.1)                         |
| 20-49                           | 2.71 (2.6-2.8)                                        | Yes                                         | 2.14 (2.0-2.2) | Malawi                                 |
|                                 | <b>Educational attainment</b>                         |                                             |                |                                        |
|                                 | <b>(p&lt;0.001)</b>                                   |                                             |                |                                        |
|                                 | No                                                    | 3.78 (3.6-4.0)                              | Mali           | 3.62 (2.5-4.1)                         |
| No education                    | 4.19 (4.0-4.4)                                        | <b>Type of toilet facility (p&lt;0.001)</b> |                |                                        |
| Primary                         | 2.09 (2.0-2.2)                                        | Improved                                    | 1.76 (1.6-1.9) | Nigeria                                |
| Secondary                       | 1.22 (1.1-1.3)                                        | Unimproved                                  | 3.43 (3.3-3.6) | Rwanda                                 |
|                                 | <b>Source of drinking water</b>                       |                                             |                |                                        |
|                                 | <b>(p&lt;0.001)</b>                                   |                                             |                |                                        |
| Higher                          | 0.66 (0.4-1.0)                                        |                                             | Senegal        | 2.43 (1.8-3.2)                         |
|                                 | <b>Working status (p&lt;0.001)</b>                    |                                             |                |                                        |
|                                 | Improved                                              | 2.54 (2.4-2.6)                              | Leone          | 1.94 (1.4-2.5)                         |
|                                 | South                                                 |                                             |                |                                        |
| No                              | 3.13 (3.0-3.3)                                        | Unimproved                                  | 3.06 (2.9-3.2) | Africa                                 |
| Yes                             | 2.48 (2.4-2.6)                                        | <b>Type of cooking fuel (p&lt;0.001)</b>    |                |                                        |
|                                 | <b>Antenatal visits during pregnancy (p&lt;0.001)</b> |                                             |                |                                        |
|                                 | Clean                                                 | 0.98 (0.8-1.2)                              | Togo           | 2.72 (2.1-3.4)                         |
| No                              | 5.41 (5.0-5.8)                                        | Unclean                                     | 2.92 (2.8-3.0) | Uganda                                 |
| Yes                             | 2.39 (2.3-2.5)                                        | <b>Urbanicity (p&lt;0.001)</b>              |                |                                        |
|                                 | <b>Postnatal check within 2 months (p&lt;0.001)</b>   |                                             |                |                                        |
|                                 | Urban                                                 | 1.73 (1.6-1.9)                              | Zimbabwe       | 0.78 (0.5-1.1)                         |
| No                              | 2.93 (2.8-3.1)                                        | Rural                                       | 3.21 (3.1-3.3) | <b>Geographic region (p&lt;0.0010)</b> |
| Yes                             | 2.42 (2.3-2.6)                                        |                                             | Western        | 3.11 (3.0-2.3)                         |
|                                 | Eastern                                               |                                             |                |                                        |
|                                 | Central                                               |                                             |                |                                        |
|                                 | South                                                 |                                             |                |                                        |
|                                 | Africa                                                |                                             |                |                                        |
|                                 | 0.88 (0.66-1.1)                                       |                                             |                |                                        |

605

606

607 Table 3: Multinomial regression showing risk factors of co-existence of stunting, underweight, and wasting

| Variable                                            | Base outcome (Ref: Normal) |        |       |                                  |        |       |
|-----------------------------------------------------|----------------------------|--------|-------|----------------------------------|--------|-------|
|                                                     | Single and two dimensions  |        |       | Co-existence of three-dimensions |        |       |
|                                                     | RRR                        | 95% CI |       | RRR                              | 95% CI |       |
| <b>Age of child (Ref:0)</b>                         |                            |        |       |                                  |        |       |
| 1                                                   | 2.008***                   | 1.93   | 2.089 | 3.714***                         | 3.319  | 4.156 |
| 2                                                   | 2.624***                   | 2.514  | 2.739 | 2.827***                         | 2.48   | 3.222 |
| 3                                                   | 2.122***                   | 2.018  | 2.231 | 1.464***                         | 1.227  | 1.748 |
| 4                                                   | 1.504***                   | 1.417  | 1.597 | 1.051                            | 0.84   | 1.315 |
| <b>Sex of child (Ref: Male)</b>                     |                            |        |       |                                  |        |       |
| Female                                              | 0.752***                   | 0.731  | 0.775 | 0.468***                         | 0.429  | 0.51  |
| <b>Birth order (Ref: 1)</b>                         |                            |        |       |                                  |        |       |
| 2                                                   | 0.938**                    | 0.896  | 0.981 | 1.002                            | 0.875  | 1.146 |
| 5 and above                                         | 0.969                      | 0.92   | 1.021 | 0.995                            | 0.858  | 1.155 |
| <b>Perceived size at birth (Ref: Large)</b>         |                            |        |       |                                  |        |       |
| Average                                             | 1.32***                    | 1.276  | 1.365 | 1.756***                         | 1.574  | 1.958 |
| Small                                               | 1.931***                   | 1.846  | 2.02  | 3.818***                         | 3.383  | 4.308 |
| <b>Maternal age (Ref: 15-19)</b>                    |                            |        |       |                                  |        |       |
| 20-49                                               | 0.834***                   | 0.78   | 0.891 | 0.881                            | 0.735  | 1.056 |
| <b>Educational attainment (Ref: Higher)</b>         |                            |        |       |                                  |        |       |
| No education                                        | 2.624***                   | 2.305  | 2.987 | 3.291***                         | 1.961  | 5.522 |
| Primary                                             | 2.189***                   | 1.927  | 2.487 | 2.381***                         | 1.417  | 4.001 |
| Secondary                                           | 1.751***                   | 1.545  | 1.985 | 1.617                            | 0.971  | 2.691 |
| <b>Working status (Ref: Yes)</b>                    |                            |        |       |                                  |        |       |
| No                                                  | 1.018                      | 0.984  | 1.053 | 1.195***                         | 1.086  | 1.314 |
| <b>Antenatal visits during pregnancy (Ref: Yes)</b> |                            |        |       |                                  |        |       |
| No                                                  | 1.139***                   | 1.079  | 1.201 | 1.364***                         | 1.208  | 1.541 |
| <b>Postnatal check within 2 months (Ref: Yes)</b>   |                            |        |       |                                  |        |       |
| No                                                  | 0.98                       | 0.946  | 1.015 | 0.977                            | 0.879  | 1.086 |
| <b>Place of delivery (Ref: Health facility)</b>     |                            |        |       |                                  |        |       |

|                                                        |          |       |       |          |       |       |
|--------------------------------------------------------|----------|-------|-------|----------|-------|-------|
| Home                                                   | 1.183*** | 1.137 | 1.23  | 1.372*** | 1.232 | 1.529 |
| Other                                                  | 1.046    | 0.912 | 1.201 | 1.047    | 0.71  | 1.543 |
| <b>Wealth status (Ref: Rich)</b>                       |          |       |       |          |       |       |
| Poor                                                   | 1.297*** | 1.235 | 1.361 | 1.408*** | 1.235 | 1.605 |
| Middle                                                 | 1.195*** | 1.138 | 1.254 | 1.214**  | 1.054 | 1.397 |
| <b>Age of household head (Ref: Young-adult)</b>        |          |       |       |          |       |       |
| Middle-aged adults                                     | 0.954**  | 0.921 | 0.987 | 1.01     | 0.913 | 1.118 |
| Old-aged adults                                        | 0.974    | 0.93  | 1.021 | 1.065    | 0.936 | 1.213 |
| <b>Sex of household head (Ref: Male)</b>               |          |       |       |          |       |       |
| Female                                                 | 0.977    | 0.94  | 1.015 | 1.035    | 0.925 | 1.159 |
| <b>Access to media (tv/radio/newspaper) (Ref: Yes)</b> |          |       |       |          |       |       |
| No                                                     | 1.079*** | 1.042 | 1.117 | 1.255*** | 1.144 | 1.377 |
| <b>Access to electricity (Ref: Yes)</b>                |          |       |       |          |       |       |
| No                                                     | 1.136*** | 1.083 | 1.191 | 1.062    | 0.922 | 1.225 |
| <b>Type of toilet facility (Ref: Improved)</b>         |          |       |       |          |       |       |
| Unimproved                                             | 1.027    | 0.991 | 1.065 | 1.158**  | 1.032 | 1.3   |
| <b>Source of drinking water (Ref: Improved)</b>        |          |       |       |          |       |       |
| Unimproved                                             | 0.959**  | 0.928 | 0.99  | 0.968    | 0.885 | 1.058 |
| <b>Type of cooking fuel (Ref: Clean)</b>               |          |       |       |          |       |       |
| Unclean                                                | 1.177*** | 1.089 | 1.271 | 1.316    | 0.97  | 1.787 |
| <b>Urbanicity (Ref: Urban)</b>                         |          |       |       |          |       |       |
| Rural                                                  | 1.05**   | 1.006 | 1.095 | 0.943    | 0.832 | 1.069 |

608

609

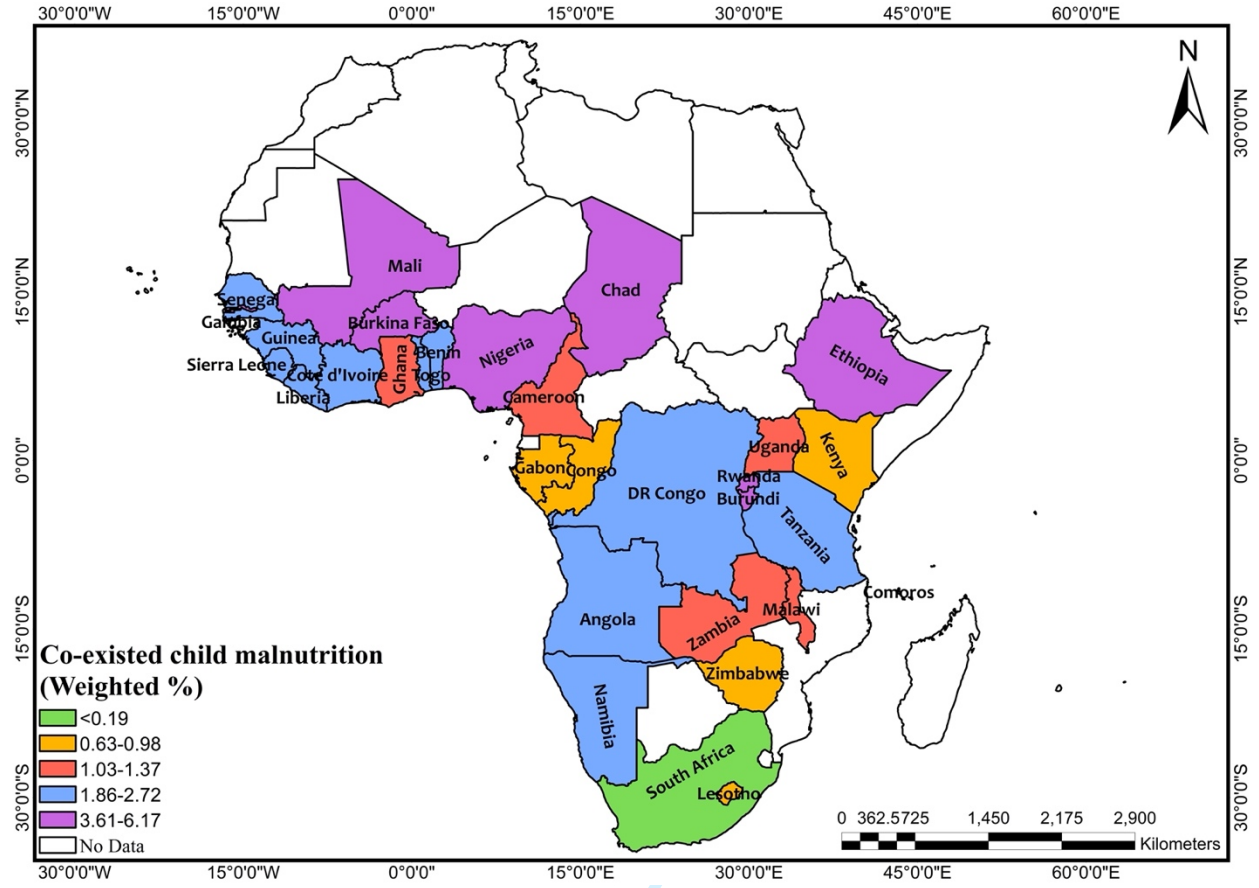

Figure 1: Percentage distribution of co-existence of stunting, underweight, and wasting (SUW) in children from the 31 study countries in SSA



**Figure 2:** Percentage distribution of co-existence of stunting, underweight, and wasting (SUW) in children by regions of SSA

## Supplementary Tables

**Appendix 1: Distribution of sample by country**

| Country       | Survey year | n      | %     |
|---------------|-------------|--------|-------|
| Angola        | 2015-16     | 7,318  | 5.74  |
| Benin         | 2017-18     | 15,473 | 12.14 |
| Burkina Faso  | 2010        | 8,908  | 6.99  |
| Burundi       | 2016-17     | 4,172  | 3.27  |
| Cameroon      | 2018        | 2,911  | 2.28  |
| Chad          | 2014-2015   | 5,999  | 4.71  |
| Comoros       | 2012        | 1,320  | 1.03  |
| Congo         | 2013        | 2,609  | 2.05  |
| Cote d'Ivoire | 2011-12     | 2,174  | 1.71  |
| Congo DR      | 2013-14     | 4,806  | 3.77  |
| Ethiopia      | 2016        | 6,573  | 5.16  |
| Gabon         | 2012        | 1,960  | 1.54  |
| Gambia        | 2013        | 743    | 0.58  |
| Ghana         | 2014        | 1,896  | 1.49  |
| Guinea        | 2018        | 2,237  | 1.75  |
| Kenya         | 2014        | 6,066  | 4.76  |
| Lesotho       | 2014        | 1,012  | 0.79  |
| Liberia       | 2013        | 1,946  | 1.53  |
| Malawi        | 2015-16     | 4,027  | 3.16  |
| Mali          | 2018        | 5,653  | 4.43  |
| Namibia       | 2013        | 905    | 0.71  |
| Nigeria       | 2018        | 7,379  | 5.79  |
| Rwanda        | 2014-15     | 4,408  | 3.46  |
| Senegal       | 2010-11     | 1,944  | 1.52  |
| Sierra Leone  | 2019        | 2,689  | 2.11  |
| South Africa  | 2016        | 855    | 0.67  |
| Tanzania      | 2015-16     | 6,061  | 4.75  |
| Togo          | 2013-14     | 2,220  | 1.74  |
| Uganda        | 2016        | 2,891  | 2.27  |
| Zambia        | 2018        | 6,347  | 4.98  |
| Zimbabwe      | 2015        | 3,987  | 3.13  |

| Appendix 2: Multicollinearity diagnosis |      |          |           |           |
|-----------------------------------------|------|----------|-----------|-----------|
| Variable                                | VIF  | SQRT VIF | Tolerance | R-Squared |
| Age of child                            | 1.05 | 1.02     | 0.9547    | 0.0453    |
| Sex of child                            | 1.01 | 1        | 0.9948    | 0.0052    |
| Birth order                             | 1.36 | 1.17     | 0.7366    | 0.2634    |
| Perceived size at birth                 | 1.02 | 1.01     | 0.9798    | 0.0202    |
| Age at child birth                      | 1.22 | 1.1      | 0.8224    | 0.1776    |
| Educational attainment                  | 1.51 | 1.23     | 0.664     | 0.336     |
| Working status                          | 1.07 | 1.03     | 0.9357    | 0.0643    |
| Antenatal visits during pregnancy       | 1.25 | 1.12     | 0.7976    | 0.2024    |
| Postnatal check within 2 months         | 1.1  | 1.05     | 0.9098    | 0.0902    |
| Place of delivery                       | 1.31 | 1.15     | 0.7617    | 0.2383    |
| Wealth status                           | 1.8  | 1.34     | 0.5554    | 0.4446    |
| Age of household head                   | 1.05 | 1.02     | 0.9546    | 0.0454    |
| Sex of household head                   | 1.03 | 1.02     | 0.9702    | 0.0298    |
| Access to media (tv/radio/newspaper)    | 1.26 | 1.12     | 0.7913    | 0.2087    |
| Access to electricity                   | 1.71 | 1.31     | 0.5837    | 0.4163    |
| Type of toilet facility                 | 1.35 | 1.16     | 0.7404    | 0.2596    |
| Source of drinking water                | 1.09 | 1.04     | 0.9191    | 0.0809    |
| Type of cooking fuel                    | 1.31 | 1.14     | 0.7653    | 0.2347    |
| Urbanicity                              | 1.58 | 1.26     | 0.6319    | 0.3681    |
| Country                                 | 1.17 | 1.08     | 0.8579    | 0.1421    |
| Mean VIF                                | 1.26 |          |           |           |



## Appendix 3: Country-level risk of co-existence of stunting, wasting, and underweight

| Country (Ref: Angola) | Base outcome (Ref: Normal) |        |       |                                  |        |       |
|-----------------------|----------------------------|--------|-------|----------------------------------|--------|-------|
|                       | Single and two dimensions  |        |       | Co-existence of three-dimensions |        |       |
|                       | RRR                        | 95% CI |       | RRR                              | 95% CI |       |
| Benin                 | 0.651***                   | 0.598  | 0.708 | 0.625***                         | 0.489  | 0.798 |
| Burkina Faso          | 0.952                      | 0.866  | 1.046 | 1.946***                         | 1.526  | 2.481 |
| Burundi               | 1.580***                   | 1.424  | 1.753 | 2.049***                         | 1.545  | 2.718 |
| Cameroon              | 0.669***                   | 0.593  | 0.756 | 0.398***                         | 0.261  | 0.609 |
| Chad                  | 0.910                      | 0.823  | 1.007 | 1.505**                          | 1.184  | 1.913 |
| Comoros               | 0.883                      | 0.745  | 1.046 | 0.656                            | 0.378  | 1.138 |
| Congo                 | 0.674***                   | 0.580  | 0.783 | 0.472**                          | 0.279  | 0.800 |
| Cote d'Ivoire         | 0.734***                   | 0.638  | 0.844 | 0.739                            | 0.492  | 1.109 |
| DR Congo              | 1.229***                   | 1.100  | 1.373 | 1.351                            | 0.988  | 1.847 |
| Ethiopia              | 0.810***                   | 0.726  | 0.904 | 0.813                            | 0.604  | 1.095 |
| Gabon                 | 0.495***                   | 0.415  | 0.59  | 0.319**                          | 0.128  | 0.796 |
| Gambia                | 0.732**                    | 0.603  | 0.889 | 1.001                            | 0.618  | 1.620 |
| Ghana                 | 0.453***                   | 0.386  | 0.531 | 0.545**                          | 0.346  | 0.857 |
| Guinea                | 0.798***                   | 0.705  | 0.904 | 0.726                            | 0.509  | 1.036 |
| Kenya                 | 0.553***                   | 0.498  | 0.615 | 0.321***                         | 0.230  | 0.449 |
| Lesotho               | 0.777**                    | 0.654  | 0.924 | 0.369***                         | 0.177  | 0.772 |
| Liberia               | 0.658***                   | 0.565  | 0.768 | 0.776                            | 0.484  | 1.243 |
| Malawi                | 0.794***                   | 0.708  | 0.889 | 0.447***                         | 0.291  | 0.687 |
| Mali                  | 0.600***                   | 0.541  | 0.664 | 1.006                            | 0.769  | 1.316 |
| Namibia               | 0.680***                   | 0.568  | 0.815 | 0.849                            | 0.505  | 1.426 |
| Nigeria               | 0.953                      | 0.868  | 1.046 | 1.527**                          | 1.183  | 1.972 |
| Rwanda                | 1.059                      | 0.954  | 1.176 | 1.991***                         | 1.541  | 2.571 |
| Senegal               | 0.660***                   | 0.572  | 0.761 | 0.643*                           | 0.434  | 0.952 |
| Sierra Leone          | 0.641***                   | 0.567  | 0.725 | 0.656*                           | 0.447  | 0.963 |
| South Africa          | 0.788*                     | 0.634  | 0.979 | 0.108***                         | 0.033  | 0.352 |
| Tanzania              | 0.772***                   | 0.699  | 0.851 | 0.699**                          | 0.512  | 0.954 |
| Togo                  | 0.557***                   | 0.490  | 0.633 | 0.838                            | 0.590  | 1.190 |
| Uganda                | 0.627***                   | 0.556  | 0.708 | 0.421***                         | 0.278  | 0.637 |
| Zambia                | 0.904*                     | 0.818  | 0.998 | 0.519***                         | 0.366  | 0.736 |
| Zimbabwe              | 0.693***                   | 0.620  | 0.775 | 0.344***                         | 0.214  | 0.554 |

# BMJ Open

## Risk factors associated with the co-existence of stunting, underweight, and wasting in children under five: Analysis of cross-sectional surveys from 31 sub-Saharan African countries

|                                 |                                                                                                                                                                                                                                                                                                                                                                                                                                                                                                                                                                                                                                                                                                                                                                                                                                                                                                                                                                                                                                                                                                                                                                                                                                                                                                                                                                                                                                                                                                                                                                                                                                                                                                                                                                                                                                              |
|---------------------------------|----------------------------------------------------------------------------------------------------------------------------------------------------------------------------------------------------------------------------------------------------------------------------------------------------------------------------------------------------------------------------------------------------------------------------------------------------------------------------------------------------------------------------------------------------------------------------------------------------------------------------------------------------------------------------------------------------------------------------------------------------------------------------------------------------------------------------------------------------------------------------------------------------------------------------------------------------------------------------------------------------------------------------------------------------------------------------------------------------------------------------------------------------------------------------------------------------------------------------------------------------------------------------------------------------------------------------------------------------------------------------------------------------------------------------------------------------------------------------------------------------------------------------------------------------------------------------------------------------------------------------------------------------------------------------------------------------------------------------------------------------------------------------------------------------------------------------------------------|
| Journal:                        | <i>BMJ Open</i>                                                                                                                                                                                                                                                                                                                                                                                                                                                                                                                                                                                                                                                                                                                                                                                                                                                                                                                                                                                                                                                                                                                                                                                                                                                                                                                                                                                                                                                                                                                                                                                                                                                                                                                                                                                                                              |
| Manuscript ID                   | bmjopen-2021-052267.R3                                                                                                                                                                                                                                                                                                                                                                                                                                                                                                                                                                                                                                                                                                                                                                                                                                                                                                                                                                                                                                                                                                                                                                                                                                                                                                                                                                                                                                                                                                                                                                                                                                                                                                                                                                                                                       |
| Article Type:                   | Original research                                                                                                                                                                                                                                                                                                                                                                                                                                                                                                                                                                                                                                                                                                                                                                                                                                                                                                                                                                                                                                                                                                                                                                                                                                                                                                                                                                                                                                                                                                                                                                                                                                                                                                                                                                                                                            |
| Date Submitted by the Author:   | 29-Oct-2021                                                                                                                                                                                                                                                                                                                                                                                                                                                                                                                                                                                                                                                                                                                                                                                                                                                                                                                                                                                                                                                                                                                                                                                                                                                                                                                                                                                                                                                                                                                                                                                                                                                                                                                                                                                                                                  |
| Complete List of Authors:       | <p>Amadu, Iddrisu; University of Cape Coast, Africa Centre of Excellence in Coastal Resilience, University of Cape Coast, Cape Coast, Ghana;<br/> University of Cape Coast, Department of Fisheries and Aquatic Sciences, School of Biological Sciences, College of Agriculture and Natural Sciences, University of Cape Coast, Ghana</p> <p>Seidu, Abdul-Aziz; University of Cape Coast, Department of Population and Health; James Cook University, College of Public Health, Medical and Veterinary Sciences, James Cook University, Townsville, Queensland, Australia</p> <p>Duku, Eric; University of Cape Coast, Africa Centre of Excellence in Coastal Resilience, University of Cape Coast, Cape Coast, Ghana;<br/> University of Cape Coast, Department of Fisheries and Aquatic Sciences, School of Biological Sciences, College of Agriculture and Natural Sciences, University of Cape Coast, Ghana</p> <p>Boadu Frimpong, James; University of Cape Coast, Department of Health, Physical Education, and Recreation, University of Cape Coast, Cape Coast, Ghana</p> <p>Hagan Jnr., John; University of Cape Coast, Department of Health, Physical Education, and Recreation, University of Cape Coast, Cape Coast, Ghana</p> <p>Aboagye, Richard ; University of Health and Allied Sciences, School of Public Health, University of Health and Allied Sciences, Ho, Ghana</p> <p>Ampah, Belinda; Nursing and Midwifery Training College, Department of Academics, Nursing and Midwifery Training College, P.O.Box, 7, Esiama, Ghana</p> <p>Adu, Collins; Kwame Nkrumah University of Science and Technology, Department of Health Promotion and Disability Studies</p> <p>Ahinkorah, Bright; University of Technology Sydney, School of Public Health, Faculty of Health, University of Technology Sydney, NSW, Australia.</p> |
| <b>Primary Subject Heading</b>: | Public health                                                                                                                                                                                                                                                                                                                                                                                                                                                                                                                                                                                                                                                                                                                                                                                                                                                                                                                                                                                                                                                                                                                                                                                                                                                                                                                                                                                                                                                                                                                                                                                                                                                                                                                                                                                                                                |
| Secondary Subject Heading:      | Health services research, Health policy, Global health                                                                                                                                                                                                                                                                                                                                                                                                                                                                                                                                                                                                                                                                                                                                                                                                                                                                                                                                                                                                                                                                                                                                                                                                                                                                                                                                                                                                                                                                                                                                                                                                                                                                                                                                                                                       |
| Keywords:                       | Public health < INFECTIOUS DISEASES, Epidemiology < TROPICAL MEDICINE, Child protection < PAEDIATRICS                                                                                                                                                                                                                                                                                                                                                                                                                                                                                                                                                                                                                                                                                                                                                                                                                                                                                                                                                                                                                                                                                                                                                                                                                                                                                                                                                                                                                                                                                                                                                                                                                                                                                                                                        |

1  
2  
3  
4  
5  
6  
7  
8  
9  
10  
11  
12  
13  
14  
15  
16  
17  
18  
19  
20  
21  
22  
23  
24  
25  
26  
27  
28  
29  
30  
31  
32  
33  
34  
35  
36  
37  
38  
39  
40  
41  
42  
43  
44  
45  
46  
47  
48  
49  
50  
51  
52  
53  
54  
55  
56  
57  
58  
59  
60



SCHOLARONE™  
Manuscripts



I, the Submitting Author has the right to grant and does grant on behalf of all authors of the Work (as defined in the below author licence), an exclusive licence and/or a non-exclusive licence for contributions from authors who are: i) UK Crown employees; ii) where BMJ has agreed a CC-BY licence shall apply, and/or iii) in accordance with the terms applicable for US Federal Government officers or employees acting as part of their official duties; on a worldwide, perpetual, irrevocable, royalty-free basis to BMJ Publishing Group Ltd ("BMJ") its licensees and where the relevant Journal is co-owned by BMJ to the co-owners of the Journal, to publish the Work in this journal and any other BMJ products and to exploit all rights, as set out in our [licence](#).

The Submitting Author accepts and understands that any supply made under these terms is made by BMJ to the Submitting Author unless you are acting as an employee on behalf of your employer or a postgraduate student of an affiliated institution which is paying any applicable article publishing charge ("APC") for Open Access articles. Where the Submitting Author wishes to make the Work available on an Open Access basis (and intends to pay the relevant APC), the terms of reuse of such Open Access shall be governed by a Creative Commons licence – details of these licences and which [Creative Commons](#) licence will apply to this Work are set out in our licence referred to above.

Other than as permitted in any relevant BMJ Author's Self Archiving Policies, I confirm this Work has not been accepted for publication elsewhere, is not being considered for publication elsewhere and does not duplicate material already published. I confirm all authors consent to publication of this Work and authorise the granting of this licence.

1  
2  
3  
4  
5  
6  
7  
8  
9  
10  
11  
12

1 **Risk factors associated with the co-existence of stunting, underweight, and wasting in**  
2 **children under five: Analysis of cross-sectional surveys from 31 sub-Saharan African**  
3 **countries**

4 Iddrisu Amadu<sup>1,2,3</sup>, Abdul-Aziz Seidu<sup>4,5,6</sup>, Eric Duku<sup>1,2</sup>, James Boadu Frimpong<sup>7</sup>, John Elvis  
5 Hagan Jr<sup>7,8</sup>, Richard Gyan Aboagye<sup>9</sup>, Belinda Ampah<sup>10</sup>, Collins Adu<sup>11</sup>, Bright Opoku  
6 Ahinkorah<sup>12</sup>  
7

- 8  
9  
10  
11  
12  
13  
14  
15  
16  
17  
18  
19  
20  
21  
22  
23  
24  
25  
26  
27  
28  
29  
30  
31  
32  
33  
34  
35  
36  
37  
38  
39  
40
1. Africa Centre of Excellence in Coastal Resilience, University of Cape Coast, Cape Coast, Ghana
  2. Department of Fisheries and Aquatic Sciences, School of Biological Sciences, College of Agriculture and Natural Sciences, University of Cape Coast, Ghana
  3. Emperiks Research, NToo85, Tamale, Ghana
  4. Department of Population and Health, College of Humanities and Legal Studies, University of Cape Coast, Ghana.
  5. College of Public Health, Medical and Veterinary Sciences, James Cook University, Townsville, Queensland, Australia
  6. Department of Estate Management, Takoradi Technical University, Takoradi, Ghana
  7. Department of Health, Physical Education, and Recreation, University of Cape Coast, Cape Coast, Ghana
  8. Neurocognition and Action-Biomechanics-Research Group, Faculty of Psychology and Sport Sciences, Bielefeld University, Bielefeld-Germany
  9. School of Public Health, University of Health and Allied Sciences, Ho, Ghana
  10. Department of Academics, Nursing and Midwifery Training College, P.O.Box, 7, Esiama, Ghana
  11. Department of Health Promotion, Education and Disability Studies, Kwame Nkrumah University of Science and Technology, Kumasi, Ghana
  12. School of Public Health, Faculty of Health, University of Technology Sydney, NSW, Australia.

41 **Email addresses**

42  
43  
44  
45  
46  
47  
48  
49  
50  
51  
52  
53  
54  
55

31 IA: iddrisu.amadu@stu.ucc.edu.gh  
32 \*AS: abdul-aziz.seidu@stu.ucc.edu.gh  
33 ED: eric.duku@stu.ucc.edu.gh  
34 JBF: frimpongboadujames@gmail.com  
35 JEH: elvis.hagan@ucc.edu.gh  
36 RGA: raboagye18@sph.uhas.edu.gh  
37 BA: [oyebel@gmail.com](mailto:oyebel@gmail.com)  
38 CA: collinsadu80@yahoo.com  
39 BOA: brightahinkorah@gmail.com  
40

41 **Correspondence to:**

42 Abdul-Aziz Seidu, Department of Population and Health, University of Cape Coast, PMB TF0494,  
43 Cape Coast, Ghana, Email:abdul-aziz.seidu@stu.ucc.edu.gh

1  
2  
3 44 **ABSTRACT**  
4

5 45 **Objective:** This study investigated the risk factors associated with the co-existence of  
6 46 stunting, underweight, and wasting among children under age five in sub-Saharan  
7 47 Africa(SSA).

8  
9 48 **Methods:** Data from 31 sub-Saharan African countries were pooled from the Demographic  
10 49 and Health Surveys collected between 2010 and 2019. We examined the risk of co-  
11 50 existence of undernutrition using multinomial logistic regression models, with results  
12 51 presented as relative risk ratios with their respective confidence intervals.

13  
14  
15 52 **Outcome measures:** The outcome variables were three child anthropometrics: stunting  
16 53 (height-for-age z-scores); underweight (weight-for-age z-scores); and wasting (weight-for-  
17 54 height z-scores).

18  
19 55 **Results:** The prevalence of co-existence of stunting, underweight, and wasting varied  
20 56 across countries and sub-regions, with the highest and lowest prevalence of co-existence  
21 57 of stunting, underweight, and wasting as Benin (12.14%) and Gambia (0.58%) respectively.  
22 58 The risk of co-existence of the three undernutrition dimensions was higher among children  
23 59 age 1 year compared to those aged 0. The risk of co-existence of the three dimensions was  
24 60 higher among female children, those with small size at birth, those whose mothers had no  
25 61 education, not working, had no antenatal visits during pregnancy, children delivered at  
26 62 home, those whose mothers were poor, had no access to media and children whose  
27 63 mothers had unimproved toilet facility.

28  
29  
30 64 **Conclusion:** Findings suggest the urgent need for consideration of the co-existence of  
31 65 stunting, wasting and underweight among under-five children in policy design and  
32 66 programming of interventions to eradicate child malnutrition in SSA. In the short-term,  
33 67 national-level policies and interventions need to be well-tailored considering the  
34 68 compositional characteristics. In the long-term, regional policies and coordinated  
35 69 interventions among governments of SSA countries need to be designed to address the  
36 70 disparate prevalence of the co-existence of stunting, wasting and underweight in under-  
37 71 five children across the four geographic regions.

38  
39 72 **Keywords:** co-existence; stunting; underweight; wasting; children under five; sub-Saharan  
40 73 Africa  
41  
42  
43  
44  
45  
46  
47  
48  
49  
50  
51  
52  
53  
54  
55  
56  
57  
58  
59  
60

1  
2  
3 74  
4  
5  
6  
7  
8  
9  
10  
11  
12  
13  
14  
15  
16  
17  
18  
19  
20  
21  
22  
23  
24  
25  
26  
27  
28  
29  
30  
31  
32  
33  
34  
35  
36  
37  
38  
39  
40  
41  
42  
43  
44  
45  
46

### ***Strength and Limitations***

- The use of nationally representative data ensures that our findings are generalizable and replicable in the 31 SSA countries included in this study.
- Findings contribute to bridging the gaps identified in the current research on CNS by including multiple indicators (stunting, underweight, and wasting) in the concurrent measurement of our outcome variable, compared to the unitary assessment on undernutrition that currently dominates literature.
- The study relied on secondary data, the analysis was limited to only variables that were in the dataset. Hence, interpretations and inferences made from current findings must be limited to only these observed variables.
- Also, the DHS employs cross-sectional designs which restrict causality on the noted outcomes.
- The key variables were self-reported by the mothers, and therefore, there is the likelihood of recall bias and other social desirability concerns in the present study.

47 75

48 76

49 77

50 78

51 79

52 80

53 81

54  
55  
56  
57  
58  
59  
60

## 82 BACKGROUND

83 Undernutrition among children under 5 years remains a major public health problem  
84 across many low-and middle-income countries<sup>1-3</sup>. Factors such as insufficient food intake,  
85 diarrhoea, recurring infections, poor sanitation practices, and low parental education have  
86 been identified as significant contributors to the high prevalence of undernutrition during  
87 childhood<sup>4,5</sup>. Despite the numerous interventions rolled out to address childhood  
88 undernutrition especially in sub-Saharan Africa where the phenomenon is quite pervasive,  
89 the progress seems to be insignificant<sup>6,7</sup>. For example, a study reported that child  
90 undernutrition accounted for nearly half (45%) of the child mortality rate in low-and middle-  
91 income countries<sup>8</sup>. Aside from that, it was reported in 2018 that about 149 million and 49  
92 million children under age 5 were stunted and wasted respectively<sup>9</sup>.

93 Three main indicators that are often used to represent undernutrition are underweight or  
94 low weight for age, stunting or low height for age, and wasting or low weight for height<sup>2,10-</sup>  
95 <sup>12</sup>. Among the three indicators of undernutrition, stunting has been identified as the  
96 problem with the greatest magnitude among under 5 children in developing countries<sup>2,3</sup>.  
97 Even though the prevalence of stunting in sub-Saharan Africa is declining, it is worth noting  
98 that it is still above 30%<sup>13</sup> which is undeniably high. Research also indicates that the country-  
99 specific prevalence of stunting, underweight and wasting is still high<sup>2,3</sup>. For instance, in  
100 Ethiopia, the prevalence of wasting and stunting were 10% and 38% respectively<sup>14</sup>.  
101 Additionally, the prevalence of stunting, underweight and wasting among children in  
102 South Africa were 35.8%, 20.5%, and 17.2%<sup>3</sup>. Likewise, Anin et al.<sup>2</sup> reported 33.2%, 14.1%, 27%  
103 and 2.6% of prevalence in stunting, wasting, underweight and overweight among infants  
104 (6-23 months) across Northern Ghana.

105 Previous studies have investigated the compositional and contextual risk factors  
106 associated with either stunting, underweight or wasting among children under 5 years and  
107 found the age of a child, sex of the child, child's size at birth, mother's age during  
108 childbirth, mother's educational level, birth order, place of residence and mother's body  
109 mass index (BMI) as associated factors<sup>1-3,15,16</sup>. Other studies also found a significant linkage  
110 between household wealth quintile and maternal short stature, and nutritional status of  
111 children under 5<sup>17,18</sup>. Regarding the sex of a child, for example, female children were found  
112 to be less likely to suffer from stunting compared to males<sup>1,3</sup>.

113 Apart from studies that have examined the factors associated with either stunting,  
114 underweight, and wasting, some scholars have begun looking at predictors of the co-  
115 existence of any two or three of the indicators of malnutrition. A study in 84 countries that  
116 examined the prevalence and predictors of co-existence of stunting and wasting found  
117 sex and age of children as significant predictors<sup>19</sup>. Other studies in Ghana<sup>20</sup> and India<sup>21</sup> also  
118 examined the co-existence of stunting, underweight, and wasting and found birth interval,  
119 birth weight, dietary diversity, place of delivery, wealth index, mother's BMI, mother's  
120 educational level, and partners' educational level as associated factors. The need to  
121 examine the co-existence of stunting, underweight and wasting is important because not  
122 much work has been done on that subject and hence children who concurrently suffer  
123 from stunting, underweight, and wasting are less likely to be reached in malnutrition  
124 prevention programmes, especially in SSA. For instance, some scholars have indicated that  
125 despite evidence that wasting and stunting are global public health problems that  
126 frequently co-exist, they are usually separated in terms of policy, guidance, programming



1  
2  
3 127 and financing<sup>22</sup>. This creates a gap in the literature that needs to be filled. Despite the  
4 128 detrimental consequences of undernutrition on the health and wellbeing of children under  
5 129 5 in SSA, studies utilizing current, and nationally representative data to investigate the risk  
6 130 factors associated with the co-existence of stunting, underweight, and wasting among this  
7 131 age group are absent in the literature. Studies presenting empirical analyses of the co-  
8 132 existence of these three indicators of child undernutrition in SSA are absent in extant  
9 133 literature making it difficult for policymakers and nutritional experts to provide up-to-date  
10 134 trends with appropriate strategies to curb the situation in the sub-region. This research lag  
11 135 presents a void in extant literature which this study seeks to bridge. Therefore, the study  
12 136 investigated the risk factors of the co-existence of stunting, underweight, and wasting  
13 137 among children under age 5 in sub-Saharan Africa using data from the Demographic Health  
14 138 Survey (DHS) conducted in 31 countries between 2010 and 2019. The findings of the study  
15 139 could contribute to the formulation of policies and interventions to respond to the  
16 140 nutritional needs of children under 5 years and also suggest pragmatic ways of reducing  
17 141 undernutrition among children in the sub-region.  
18  
19  
20  
21  
22  
23

## 24 143 **METHODS**

### 25 144 **Data Source**

26  
27  
28 145 The dataset included 127,487 children under the age of 5 years from 31 sub-Saharan African  
29 146 countries (Figure 1) were pooled from the most current Demographic and Health Surveys  
30 147 (DHS) conducted between 2010 and 2019 (Appendix 1). Specifically, the data were pooled  
31 148 from the children's files in each of the countries. The DHS Program has conducted over  
32 149 400 surveys in over 90 developing countries around the world since 1984 every five years<sup>23</sup>.  
33 150 The program implements cross-sectional surveys to gather nationally-representative data,  
34 151 analyze and disseminate accurate information on important demographic and health  
35 152 indicators spanning population, nutrition, and diseases. For all surveys, standardized  
36 153 protocols designed for each target group including children, women, and men at the  
37 154 household level are employed to allow for cross-national comparisons. Stratified two-  
38 155 stage sampling involving first, the listing of enumeration areas and selection of clusters,  
39 156 and then a random selection of households in each cluster. The detailed sampling method  
40 157 can be found in a previous study<sup>24</sup>. The dataset is freely available for download at:  
41 158 <https://dhsprogram.com/data/available-datasets.cfm><sup>25</sup>. The Strengthening Reporting of  
42 159 Observational Studies in Epidemiology (STROBE) guidelines were followed in writing the  
43 160 manuscript<sup>26</sup>.  
44  
45  
46  
47

### 48 161 **Study Variables**

#### 49 162 **Outcome Variable**

50  
51  
52 163 The outcome variable considered in this study is derived from three child anthropometric  
53 164 variables including stunting (height-for-age z-scores); underweight (weight-for-age z-  
54 165 scores) and wasting (weight-for-height z-scores). The DHS (2021) specifies categorization  
55 166 for each of these variables following the WHO child growth standard. Each of the three  
56 167 variables we coded into "0" for "Normal" and "1" for "Stunting", "underweight" and  
57 168 "Wasting" respectively.  
58  
59  
60

1  
2  
3 169 These three variables were then added to generate the outcome variable “Co-existed  
4 170 undernutrition” with scores (discrete) ranging from 0 to 3 where 0 implies “Normal”, that  
5 171 is, children with none of the three conditions; 1 implies “Single burden”, that is, the child  
6 172 suffers from one of the three conditions; 2 indicates that child suffers from “Two burdens”  
7 173 out of the three; and 3 shows “Co-existed”, that is, the child suffers from all three  
8 174 conditions of undernutrition. For parsimony, children who suffered from “Single burden”  
9 175 and those who suffered from “Two burdens” were added resulting in the variable “Co-  
10 176 existed undernutrition” with three response categories: 0=Normal; 1=One or two burdens;  
11 177 and 3=co-existed.

## 15 178 **Independent Variables**

16  
17 179 Several risk factors spanning compositional to contextual factors have been associated  
18 180 with child undernutrition. The relevant biosocial characteristics and sociocultural factors  
19 181 related to the child, mother, household head and the household together form  
20 182 compositional factors<sup>27,28</sup>. Factors that describe location or “place-based” variables are  
21 183 contextual factors<sup>20,27,29,30</sup>. The relevant compositional factors considered include the age  
22 184 of the child; sex of the child; birth order of child; perceived size at birth; mother’s age;  
23 185 educational attainment; working status; antenatal visits during pregnancy; postnatal  
24 186 check within 2 months; and place of delivery. At the household level, relevant variables  
25 187 included are the wealth status; the age of household head; sex of household head (male  
26 188 and female); access to electricity; and access to media which was derived from the three  
27 189 variables “access to television”, “radio” and “newspaper”. Household basic needs  
28 190 including the type of toilet facility (re-coded into “improved” and unimproved”<sup>29</sup>; source  
29 191 of drinking water (re-coded as “improved” and “unimproved”<sup>29</sup>, and type of household  
30 192 cooking fuel (re-coded into “clean” and “unclean”<sup>29,31</sup> are also considered. The contextual  
31 193 factors considered are urbanicity and the country of origin of the participant.

## 35 194 **Data Analyses**

36  
37 195 The statistical analysis of the data was performed using the Stata SE software version 14.2.  
38 196 The “svyset” command was first used to declare the data as survey data to prevent the  
39 197 potential effects of the complex sampling techniques on the analyses. The sample weight  
40 198 variable in the DHS was used to provide weighted samples in the analyses. To understand  
41 199 the distributions of the variables, the data were summarized and presented in tables using  
42 200 descriptive statistics (frequencies, weighted percentages, and 95% confidence intervals  
43 201 (CIs) of percentages). We further integrated the data into a GIS environment and  
44 202 presented the distribution of key variables across the study countries and geographic  
45 203 regions in map images (Figure 1 and Figure 2). This approach enhances the visualization of  
46 204 the data and understanding of the context of the study. The associations between the co-  
47 205 existence of undernutrition and each of the risk factors considered were assessed using  
48 206 the chi-square test of independence, with results presented in a contingency table. The  
49 207 risk factors as independent variables were then subjected to collinearity diagnosis tests,  
50 208 including Variance Inflation Factors (VIF), Square VIF, Tolerance, and R-squared. This was  
51 209 done to ascertain whether the independent variables were actually “independent”, that  
52 210 is, are not correlated with one another and will not share variance in the outcome variable.  
53 211 Results from the multicollinearity diagnoses test (See Appendix 2) show that the variables  
54 212 were not correlated (Mean VIF=1.26; Maximum VIF=1.71; Minimum VIF=1.02). To determine

213 the risk factors associated with the co-existence of undernutrition, a multinomial  
214 regression model was implemented. All statistical tests were conducted at  $p < 0.05$ .

### 215 **Ethical Approval**

216 This study used secondary data from the DHS Program. Since we neither interacted  
217 directly nor indirectly with the study participants, there was no need for ethical approval.  
218 Details on the ethical considerations of the DHS Program could be found at  
219 [https://dhsprogram.com/methodology/Protecting-the-Privacy-of-DHS-Survey-  
220 Respondents.cfm](https://dhsprogram.com/methodology/Protecting-the-Privacy-of-DHS-Survey-Respondents.cfm).

### 222 **Patient and public involvement**

223 Patients and the public were not involved in the design and conduct of this research

### 224 **Results**

#### 225 ***Distribution of sample characteristics***

226 The study included a total of 127,487 under-five children. It is found that most (30.87%) of  
227 the children were less than a year (Table 1). With regards to sex, both males and females  
228 constituted approximately half of the sample. A majority of the children (92.87%) were  
229 born to mothers aged between 20 to 49 years while only 7.13% were born to mothers aged  
230 15 to 19 years. In terms of education, most (41.82%) of the children were born to mothers  
231 with no formal education. Only 3.10% of the children were born to a mother with a higher  
232 level of educational attainment. Further, 42.1% of the children were born in poor  
233 households while 37.21% were born in rich households. More than half (57.53%) of the  
234 children lived in a household with unimproved toilet facilities. However, most (65.63%) of  
235 the children lived in households with access to improved drinking water sources. Similarly,  
236 a majority (89.76%) of the children lived in households using clean cooking fuel (Table 1).

237 As shown in Appendix 2, the prevalence of co-existence of stunting, underweight, and  
238 underweight varied across countries and sub-regions, with the highest and lowest  
239 prevalence of co-existence of stunting, underweight, and wasting as Rwanda (6.17%) and  
240 South Africa (0.18%) respectively (Figure 1). In terms of sub-region, the highest prevalence  
241 of co-existence of stunting, underweight, and wasting was observed in Western Africa  
242 (3.11%) and the lowest prevalence in Southern Africa (0.88%) (Figure 2).

243 Significant associations between all the independent variables and co-existence of  
244 stunting, wasting, and underweight, except maternal age and age of household head,  
245 were identified (Table 2).

246 \*\*\*Table 1\*\*\*

247

248 \*\*\*Figure 1\*\*\*

249 \*\*\*Figure 2\*\*\*

250 \*\*\*Table 2\*\*\*

### 251 ***Risk factors of the co-existence of stunting, wasting and underweight***

252 Table 3 shows the results of the multinomial regression analysis of the risk factors of co-  
253 existence of dimensions of undernutrition (stunting, underweight, and wasting) among

1  
2  
3 254 children under five years in the SSA. Age of child, size of the child at birth, sex of the child,  
4 255 birth order, educational level, maternal age, ANC attendance, place of delivery, source of  
5 256 drinking water, sex of household head, wealth index, access to electricity and place of  
6 257 residence were associated with one or two dimensions of undernutrition. See Appendix 3  
7 258 for country-level risk of co-existence of stunting, wasting, and underweight.

8  
9  
10 259 Regarding the co-existence of the three dimensions of undernutrition (stunting,  
11 260 underweight, and wasting), age of the child, sex of the child, perceived birth size, maternal  
12 261 educational attainment, working status, antenatal visits during pregnancy, place of  
13 262 delivery, wealth status, access to media, and type of toilet facility were found to be  
14 263 significant risk factors (Table 3).

15  
16  
17 264 **\*\*\*Table 3\*\*\***

## 18 265 **DISCUSSION**

19  
20 266 The study investigated the risk factors of the co-existence of stunting, underweight, and  
21 267 wasting among children under age 5 in sub-Saharan Africa using data from DHS conducted  
22 268 in 31 countries between 2010 and 2019. The study found that the countries with the highest  
23 269 and lowest prevalence of co-existence of stunting, underweight, and wasting were Benin  
24 270 and Gambia respectively. In terms of geographic region, the highest prevalence of co-  
25 271 existence of stunting, underweight, and wasting was observed in Western Africa and the  
26 272 lowest prevalence in Southern Africa. The disparities in the prevalence among the  
27 273 countries and geographical regions could be attributed to the nutritional practices and  
28 274 beliefs practised in the countries and geographical regions. Differences in the health  
29 275 policies provided by governments in the various countries could also account for the  
30 276 disparities noted. This finding implies that countries that have high prevalence should take  
31 277 critical lessons from the countries that are doing well regarding the implementation of  
32 278 nutritional policies and interventions (e.g., increasing dietary supplementation, increasing  
33 279 dietary diversity) that target the reduction of the co-existence of stunting, underweight,  
34 280 and wasting among children under age 5 in sub-Saharan Africa<sup>2</sup>.

35  
36  
37  
38  
39 281 Similar to previous studies<sup>1,3</sup>, this study found that children aged 1 year, 2 years, and 3 years  
40 282 were at greater risk of having co-existence of all the three forms of undernutrition  
41 283 compared to those aged 0. A plausible reason for this finding could be that as children  
42 284 grow their energy needs also increase<sup>1</sup>, increasing their risk of having all three nutritional  
43 285 conditions. Alternatively, since these nutritional conditions may manifest after long  
44 286 durations of improper nutritional practices or undernutrition<sup>1,3</sup>, older children may be at  
45 287 higher risk of having all three nutritional conditions. The finding suggests that  
46 288 complementary foods given to children as they grow are inadequate. To reduce the risk of  
47 289 co-existence of stunting, underweight, and wasting among under 5 children, the health  
48 290 sectors in the various countries should invest heavily in providing adequate  
49 291 complementary feeding to this category of children.

50  
51  
52  
53 292 Corroborating the findings of other studies<sup>1,3,32,33</sup>, this study also found that children who  
54 293 were females were less likely to have a co-existence of the three dimensions of  
55 294 undernutrition compared to their male counterparts. An acceptable explanation for this  
56 295 finding could be the biological variations in morbidity between males and females at that  
57 296 young age<sup>3</sup>. It is also possible that since male children have higher birth weight compared  
58 297 to females, they require more energy<sup>1,34</sup>, which increases the risk of males having all three

298 nutritional conditions. Moreover, male children are perceived to be hungrier than females,  
299 therefore breastfeeding alone could be insufficient or inadequate<sup>3,35</sup>, increasing their  
300 susceptibility to having the three nutritional conditions. The finding suggests that male  
301 children should be given critical attention in the development and implementation of  
302 nutritional programs (e.g., dietary supplementation) to mitigate the co-existence of  
303 stunting, underweight, and wasting among these male children under 5 years.

304 The study found that the risk of co-existence of the three dimensions of undernutrition  
305 was higher among children with the average size at birth and small size at birth compared  
306 to children with large size at birth. It has been proven that undernutrition in children is  
307 partly influenced by maternal nutrition practices. Hence, mothers' appropriate nutritional  
308 behaviours during the prenatal and postnatal periods are key to improve child growth.  
309 Conversely, maternal undernutrition causes low maternal BMI, which in turn affects the  
310 foetus to poor development often associated with small birth size and low birth  
311 weight<sup>1,3,21,36</sup>. This finding indicates that mothers of children under 5 should continuously  
312 be educated on the best nutritional practices such as exclusive breastfeeding,  
313 complementary feeding, and dietary supplementation. These strategies will help  
314 ameliorate the risk of acquiring health conditions associated with undernutrition among  
315 children under 5.

316 The risk of co-existence of the three dimensions was higher among children whose  
317 mothers had no education and primary education compared to those whose mothers had  
318 higher education. Mothers who have attained higher education are better informed about  
319 improved childcare practices<sup>37</sup>, are more empowered to make health decisions<sup>38</sup>, practice  
320 good personal hygiene<sup>38</sup>, are more likely to use the health facility<sup>39</sup>, proper feeding  
321 practices<sup>36</sup> and childcare in times of illness<sup>36,40</sup>. This finding suggests that mothers with no  
322 formal or little education are neglected in nutritional programs that help to eliminate  
323 stunting, underweight, and wasting. Hence, they should be given the needed  
324 consideration to deal with this persistent health issue.

325 This study also found that the risk of co-existence of the three dimensions was higher  
326 among children whose mothers were not working compared to those whose mothers  
327 were working. Women's employment status indicates their ability to afford proper  
328 nutritional products and health care services<sup>36,40</sup>. Therefore, if mothers are not employed,  
329 the children become highly susceptible or vulnerable because mothers are unlikely to meet  
330 their nutritional needs or requirements. Mothers with children under 5 with such  
331 disadvantaged backgrounds should be given subsidies on children's nutritional products  
332 and perhaps, free access to health care services by governmental and non-governmental  
333 organizations. This step will be significant in reducing the risks of the co-existence of  
334 stunting, underweight, and wasting among children under 5 years.

335 The risk of co-existence of the three dimensions was higher among children whose  
336 mothers had no antenatal visits during pregnancy compared to those whose mothers had  
337 antenatal visits during pregnancy. Specifically, mothers who attend antenatal services are  
338 usually educated on the best practices of nutrition and general healthcare, which hitherto  
339 would not be known by these mothers<sup>38</sup>. Therefore, mothers who did not have antenatal  
340 visits may lack some knowledge about proper nutritional practices, increasing their  
341 children's risk of having these undernutrition-related challenges. Regular antenatal visits  
342 could reduce children's risk of stunting, being underweight, and wasting, therefore,

343 mothers should continuously be encouraged to go for antenatal care services in their  
344 countries.

345 Children who were delivered at home compared to children who were delivered at a health  
346 facility were found to have a higher risk of co-existence of the three dimensions. Since  
347 mothers who deliver at home do not receive any expert nutritional advice from a qualified  
348 health practitioner<sup>37</sup>, the children of such mothers are at higher risk of having these  
349 conditions because of poor and/ or inadequate dietary practices. This finding shows that  
350 facility delivery may help reduce the risk of co-existence of stunting, underweight, and  
351 wasting among children under 5. Therefore, mothers should regularly be educated on the  
352 need to opt for facility delivery because of its positive implications on children's growth.

353 The risk of co-existence of the three dimensions was higher among children whose  
354 mothers were poor and had middle wealth status compared to those whose mothers were  
355 rich. Usually, mothers who have an average income may lack the financial capacity to feed  
356 themselves and their children properly and adequately<sup>3,17,36</sup>, increasing the children's risk  
357 of being stunted, underweight or wasted. Likewise, mothers from poor and middle wealth  
358 quintiles may not have access to quality nutritional products and health care systems<sup>36,40</sup>,  
359 making their children more susceptible to having all three nutritional conditions. This  
360 finding implies that women from poor economic backgrounds should be assisted with  
361 nutritional products and services to facilitate the reduction in the risks of the co-existence  
362 of stunting, underweight, and wasting among children under 5.

363 The risk of co-existence of the three dimensions was higher among children whose  
364 mothers had no access to media compared to those whose mothers had access to media.  
365 Since many people are educated about proper nutritional practices through the mass  
366 media<sup>10,11</sup>, mothers who have no access to the media may lack certain important nutritional  
367 information they need. This information gap could increase children's risk of having all  
368 three nutritional conditions through improper dietary practices from their mothers. For  
369 instance, mothers' access to appropriate information from the media would help them  
370 decide on which proper diets or food commodities are readily available on market for their  
371 children. More pragmatic ways of reaching mothers who have no access to media are  
372 encouraged. Regular outreach or sensitization programs to target women without access  
373 to media for example could help in reducing the risks of the co-existence of stunting,  
374 underweight, and wasting among children under 5 years.

375 Children whose mothers had unimproved toilet facilities were found to have a higher risk  
376 of co-existence of the three dimensions of child undernutrition compared to those whose  
377 mothers had improved toilet facilities. Insanitary or unhygienic toilet conditions may  
378 increase mother-child-environment interactions that may result in increased exposure to  
379 childhood diseases and other opportunistic infections (e.g., diarrhoeal episodes, fever)  
380 either through consumption of contaminated foods, drinking water or poor  
381 environmental sanitation<sup>21</sup>. These conditions have been shown to cause growth  
382 retardation in children. Government and non-governmental organizations should support  
383 the provision of improved household toilet facilities for poorer communities to help  
384 minimize the risks of the co-existence of child undernutrition indicators.

385 Children from Burkina Faso, Burundi, Chad, Nigeria, and Rwanda had a higher risk of having  
386 the co-existence of the three dimensions compared to those from Angola. On the other

hand, countries such as Benin, Cameroon, Congo, Gabon, Ghana, Guinea, Kenya, Lesotho, Malawi, Senegal, Zambia, Uganda, Tanzania, Sierra Leone, Zimbabwe, and South Africa had a lower risk among their children having co-existence of the three undernutrition dimensions. The sub-regional and country-specific variations in socio-economic, agro-ecological and geographical characteristics may strongly influence the nutritional status of children because of inadequate food supplies, limited access to arable land for agriculture, unfavourable climatic conditions (e.g., desertification), rapid population growth, and increasing cost of living may determine food access, availability and production in studied countries in SSA<sup>41,42</sup>. Governmental priorities should intensify efforts to minimize the risk of co-existence of stunting, underweight, and wasting among children under age 5 with sound socio-economic and sustainable human capital development.

## 398 **Conclusions and implications**

The study investigated the risk factors of the co-existence of stunting, underweight, and wasting among children under age 5 in sub-Saharan Africa using data from DHS conducted in 31 countries between 2010 and 2019. The study found that the prevalence of co-existence of stunting, underweight, and wasting ranged from 0.58 % in the Gambia to 12.14% in Benin. The study also found that the prevalence of co-existence of stunting, underweight, and wasting was high in Western Africa (41.78%) but low in Southern Africa (5.3%). The significant findings show that the disadvantaged have more risks of the co-existence of stunting, underweight, and wasting among under 5 children in selected SSA countries. These findings demonstrate the urgent need for consideration of the co-existence of stunting, wasting and underweight among under-five children in policy design and programming of interventions to eradicate child malnutrition in SSA. In the short-term, national-level policies and interventions needs to be well-tailored considering the compositional characteristics including child's age, sex, birth size; maternal education, working status, place of delivery, antenatal visit; and household's wealth status, access to media and improved toilet facility are required. For instance, such programs could be geared towards improving females' access to education, reducing unemployment, expanding access to the media and using it to promote education on the need for antenatal care. In the long-term, regional policies and coordinated interventions among governments of SSA countries need to be designed to address the disparate prevalence of the co-existence of stunting, wasting and underweight in under-five children across the four geographic regions. The implementation of these at the local-level should consider rural-urban differences in the prevalence of the condition and the risk factors elicited.

421

**Acknowledgements:** The authors thank the MEASURE DHS project for their support and free access to the original data

**Contributors:** IA and BOA developed the study concept. IA performed the data analysis. AS, ED, JBF, JEH, RGA, BA, CA and BOA drafted and revised the manuscript critically for its intellectual content. All authors read and approved the final manuscript. AS had the final responsibility to submit the manuscript.

428

**Funding:** This research received no specific grant from any funding agency in the public, commercial or not-for-profit sectors

431 **Competing interests:** None

432

433 **Patient consent for publication:** No consent to publish was needed for this study  
434 as we did not use any details, images or videos related to individual participants. In  
435 addition, data used are available in the public domain.

436

437 **Ethics Approval and consent to participate**

438 This study used secondary data from the DHS Program. Since we neither interacted  
439 directly nor indirectly with the study participants, there was no need for ethical approval.  
440 Details on the ethical considerations of the DHS Program could found at  
441 [https://dhsprogram.com/methodology/Protecting-the-Privacy-of-DHS-Survey-](https://dhsprogram.com/methodology/Protecting-the-Privacy-of-DHS-Survey-Respondents.cfm)  
442 [Respondents.cfm](https://dhsprogram.com/methodology/Protecting-the-Privacy-of-DHS-Survey-Respondents.cfm).

443

444 **Provenance and peer review:** Not commissioned; externally peer reviewed.

445

446 **Data availability statement:** Data are available in a public, open access repository.

447

## 448 **References**

- 449 1. Amare ZY, Ahmed ME, Mehari AB. Determinants of nutritional status among  
450 children under age 5 in Ethiopia: further analysis of the 2016 Ethiopia demographic  
451 and health survey. *Global Health* 2019;15(1):1–11.
- 452 2. Anin SK, Saaka M, Fischer F, Kraemer A. Association between Infant and Young  
453 Child Feeding (IYCF) Indicators and the Nutritional Status of Children (6–23  
454 Months) in Northern Ghana. *Nutrients* 2020; 12, 2565.  
455 <https://doi.org/10.3390/nu12092565>
- 456 3. Madiba S, Chelule PK, Mokgatle MM. Attending informal preschools and daycare  
457 centers is a risk factor for underweight, stunting and wasting in children under the  
458 age of five years in underprivileged communities in South Africa. *International  
459 Journal of Environmental Research and Public Health* 2019; 16(14), 2589.
- 460 4. Yalew BM, Amsalu F, Bikes D. Prevalence and factors associated with stunting,  
461 underweight and wasting: a community based cross sectional study among  
462 children age 6-59 months at Lalibela Town, Northern Ethiopia. *J Nutr Disorders Ther*  
463 2014; 4(147), 2161-0509.
- 464 5. WHO. Nutrition Landscape Information System (NLIS) Country Profile Indicators:  
465 Interpretation Guide; World Health Organization: Geneva, Switzerland, 2010.
- 466 6. Akombi BJ, Agho KE, Hall JJ, Wali N, Renzaho A, Merom D. Stunting, wasting and  
467 underweight in sub-Saharan Africa: a systematic review. *International Journal of  
468 Environmental Research and Public Health* 2017; 14(8), 863.
- 469 7. WHO. Global nutrition targets 2025: policy brief series (WHO/NMH/NHD/14.2).  
470 Geneva: World Health Organization; 2014.  
471 [https://apps.who.int/iris/bitstream/handle/10665/149018/WHO\\_NMH\\_NHD\\_14.2\\_e](https://apps.who.int/iris/bitstream/handle/10665/149018/WHO_NMH_NHD_14.2_eng.pdf)  
472 [ng.pdf](https://apps.who.int/iris/bitstream/handle/10665/149018/WHO_NMH_NHD_14.2_eng.pdf)
- 473 8. Black RE, Victora CG, Walker SP, Bhutta ZA, Christian P, De Onis M, Ezzati M,  
474 Grantham-McGregor S, Katz J, Martorell R, Uauy R, Maternal and Child Nutrition  
475 Study Group. Maternal and child undernutrition and overweight in low-income and  
476 middle-income countries. *The lancet* 2013; 382(9890), 427-451.



1  
2  
3  
4  
5  
6  
7  
8  
9  
10  
11  
12  
13  
14  
15  
16  
17  
18  
19  
20  
21  
22  
23  
24  
25  
26  
27  
28  
29  
30  
31  
32  
33  
34  
35  
36  
37  
38  
39  
40  
41  
42  
43  
44  
45  
46  
47  
48  
49  
50  
51  
52  
53  
54  
55  
56  
57  
58  
59  
60

9. World Health Organization. Levels and trends in child malnutrition: key findings of the 2019 edition (No. WHO/NMH/NHD/19.20). World Health Organization. 2019.
10. De Onis M, Onyango A, Borghi E, Siyam A, Blössner M, Lutter C. Worldwide implementation of the WHO child growth standards. *Public Health Nutrition* 2012; 15(9), 1603-1610.
11. De Onis M, Blössner M, Borghi E. Prevalence and trends of stunting among pre-school children, 1990–2020. *Public Health Nutrition* 2012; 15(1), 142-148.
12. World Health Organization. Community-based management of severe acute malnutrition: a joint statement by the World Health Organization, the World Food Programme, the United Nations System Standing Committee on Nutrition and the United Nations Children's Fund. 2007.
13. UNICEF. Levels and trends in child malnutrition, United Nations Children's fund (UNICEF), World Health Organization, International Bank for Reconstruction and Development/The World Bank. Levels and trends in child malnutrition: key findings of the 2019 edition of the joint child malnutrition estimates. Geneva: World Health Organization; 2019 Licence: CC BY-NC-SA 3.0 IGO; 2019.
14. Central Statistical Agency (CSA)[Ethiopia] and ICF. Ethiopia demographic and health survey, Addis Ababa, Ethiopia and Calverton, Maryland, USA. 2016.
15. Yaya S, Uthman OA, Ekholuenetale M, Bishwajit G, Adjiwanou V. Effects of birth spacing on adverse childhood health outcomes: evidence from 34 countries in sub-Saharan Africa. *J Matern & Neonatal Med* 2020;33(20):3501–8.
16. Armah FA, Ekumah B, Yawson DO, Odoi JO, Afitiri A, Nyieku FE, et al. Predictive Probabilities of Access to Clean Cooking: Evidence from the Demographic and Health Surveys in 31 Countries in Sub-Saharan Africa. 2019;12(3):320–2.
17. Mamabolo RL, Alberts M, Steyn NP, Delemarre-van de Waal HA, Levitt NS. Prevalence and determinants of stunting and overweight in 3-year-old black South African children residing in the Central Region of Limpopo Province, South Africa. *Public Health Nutrition* 2005; 8(5), 501-508.
18. Novignon J, Aboagye E, Agyemang OS, Aryeetey G. Socioeconomic-related inequalities in child malnutrition: evidence from the Ghana multiple indicator cluster survey. *Health Economics Review* 2015; 5(1), 1-11.
19. Khara T, Mwangome M, Ngari M, Dolan C. Children concurrently wasted and stunted: A meta-analysis of prevalence data of children 6–59 months from 84 countries. *Maternal & child nutrition*. 2018 Apr;14(2):e12516.
20. Boah M, Azupogo F, Amporfro DA, Abada LA. The epidemiology of undernutrition and its determinants in children under five years in Ghana. *Plos one*. 2019 Jul 31;14(7):e0219665.
21. Khan RE, Raza MA. Determinants of malnutrition in Indian children: new evidence from IDHS through CIAF. *Quality & Quantity*. 2016 Jan 1;50(1):299-316.
22. Angood C, Khara T, Dolan C, Berkley JA, WaSt Technical Interest Group. Research priorities on the relationship between wasting and stunting. *PloS one*. 2016 May 9;11(5):e0153221.
23. Corsi DJ, Neuman M, Finlay JE, Subramanian SV. Demographic and health surveys: a profile. *International Journal of Epidemiology* 2012; 41(6), 1602-1613.

- 1  
2  
3 521 24. Aliaga A, Ruilin R. Cluster optimal sample size for demographic and health surveys.  
4 522 In 7th International Conference on Teaching Statistics–ICOTS (Vol. 7, pp. 2-7). 2006.  
5  
6 523 [dataset] 25. DHS. DHS data source [https://dhsprogram.com/data/available-  
8 datasets.cfm](https://dhsprogram.com/data/available-<br/>7 524 datasets.cfm)
- 9 525 26. Von Elm E, Altman DG, Egger M, Pocock SJ, Gøtzsche PC, Vandenbroucke JP, Strobe  
10 526 Initiative. The Strengthening the Reporting of Observational Studies in  
11 527 Epidemiology (STROBE) Statement: guidelines for reporting observational  
12 528 studies. *International journal of surgery*. 2014; 12(12), 1495-1499.
- 13 529 27. Collins J, Ward BM, Snow P, Kippen S, Judd F. Compositional, Contextual, and  
14 530 Collective Community Factors in Mental Health and Well-Being in Australian Rural  
15 531 Communities. *Qualitative Health Research* 2017; 27(5), 677–687.  
16 532 <https://doi.org/10.1177/1049732315625195>
- 17 533 28. Pol LG, Thomas RK. The demography of health and health care. Springer Science &  
18 534 Business Media. 2001.
- 19 535 29. Armah FA, Ekumah B, Yawson DO, Odoi JO, Afitiri AR, Nyieku F.E. Access to  
20 536 improved water and sanitation in sub-Saharan Africa in a quarter century. *Heliyon*  
21 537 2018; 4(11), e00931. <https://doi.org/10.1016/j.heliyon.2018.e00931>
- 22 538 30. Ross CE, Mirowsky J. Neighborhood socioeconomic status and health: context or  
23 539 composition? *City & Community* 2008; 7(2), 163–179.
- 24 540 31. Amegah AK, Boachie J, Näyhä S, Jaakkola JJK. Association of biomass fuel use with  
25 541 reduced body weight of adult Ghanaian women. *J Expo Sci Environ Epidemiol* 2019;1.  
26 542 32. Alemayehu M, Tinsae F, Hailelassie K, Seid O, Gebregziabher G, Yebyo H.  
27 543 Undernutrition status and associated factors in under-5 children, in Tigray,  
28 544 Northern Ethiopia. *Nutrition* 2015; 31(7-8), 964-970.
- 29 545 33. Mya KS, Kyaw AT, Tun T. Feeding practices and nutritional status of children age 6-  
30 546 23 months in Myanmar: A secondary analysis of the 2015-16 Demographic and  
31 547 Health Survey. *PloS one* 2019; 14(1), e0209044.
- 32 548 34. Bork KA, Diallo A. Boys are more stunted than girls from early infancy to 3 years of  
33 549 age in rural Senegal. *The Journal of Nutrition* 2017; 147(5), 940-947.
- 34 550 35. Tumilowicz A, Habicht JP, Pelto G, Pelletier DL. Gender perceptions predict sex  
35 551 differences in growth patterns of indigenous Guatemalan infants and young  
36 552 children. *The American Journal of Clinical Nutrition* 2015; 102(5), 1249-1258.
- 37 553 36. Mukabutera A, Thomson DR, Hedt-Gauthier BL, Basinga P, Nyirazinyoye L, Murray  
38 554 M. Risk factors associated with underweight status in children under five: an  
39 555 analysis of the 2010 Rwanda Demographic Health Survey (RDHS). *BMC Nutrition*  
40 556 2016; 2(1), 1-12.
- 41 557 37. Oyekale AS. Factors explaining acute malnutrition among under-five children in  
42 558 Sub-Sahara Africa (SSA). *Life Sci J* 2012; 9, 2101-7.
- 43 559 38. Keats A. Women's schooling, fertility, and child health outcomes: Evidence from  
44 560 Uganda's free primary education program. *Journal of Development Economics*  
45 561 2018; 135, 142-159.
- 46 562 39. Sunguya BF, Poudel KC, Mlunde LB, Urassa DP, Yasuoka J, Jimba M. Poor nutrition  
47 563 status and associated feeding practices among HIV-positive children in a food  
48 564 secure region in Tanzania: a call for tailored nutrition training. *PloS one* 2014; 9(5),  
49 565 e98308.  
50  
51  
52  
53  
54  
55  
56  
57  
58  
59  
60

- 1  
2  
3 566 40. Iannotti LL, Dulience SJL, Green J, Joseph S, François J, Antenor ML, ... Nickerson  
4 567 NM. Linear growth increased in young children in an urban slum of Haiti: a  
5 568 randomized controlled trial of a lipid-based nutrient supplement. *The American*  
6 569 *Journal of Clinical Nutrition* 2014; 99(1), 198-208.
- 8 570 41. Lopriore C, Muehlhoff E. Food security and nutrition trends in West Africa—  
9 571 Challenges and the way forward. In Proceedings of the 2nd International Workshop  
10 572 on Food-based Approaches for a Healthy Nutrition, Ouagadougou, Burkina. 2003;  
11 573 23–28.
- 13 574 42. Salami A, Kamara AB, Brixiova Z. Smallholder Agriculture in East Africa: Trends,  
14 575 Constraints and Opportunities; African Development Bank: Tunis, Tunisia, 2010.
- 16 576

## 17 18 577 **Figures**

19  
20 578 **Figure 1:** Percentage distribution of co-existence of stunting, underweight, and  
21 579 wasting (SUW) in children from the 31 study countries in SSA

23 580 **Figure 2:** Percentage distribution of co-existence of stunting, underweight, and  
24 581 wasting (SUW) in children by regions of SSA

25  
26 582  
27  
28 583  
29  
30 584  
31  
32 585  
33  
34 586  
35  
36 587  
37  
38 588  
39  
40 589  
41  
42 590  
43  
44 591  
45  
46 592  
47  
48 593  
49  
50  
51  
52  
53  
54  
55  
56  
57  
58  
59  
60

594

595 Tables

596 Table 1: Distribution of the relevant variables and characteristics of under-five children in SSA

597

| Variable                             | %     | Variable                 | %     |
|--------------------------------------|-------|--------------------------|-------|
| Age of child                         |       | Urbanicity               |       |
| 0                                    | 30.87 | Urban                    | 33.21 |
| 1                                    | 28.42 | Rural                    | 66.79 |
| 2                                    | 20.22 | Place of delivery        |       |
| 3                                    | 12.40 | Home                     | 31.33 |
| 4                                    | 8.09  | Health facility          | 67.51 |
| Sex of child                         |       | Other                    | 1.16  |
| Male                                 | 50.47 | Wealth status            |       |
| Female                               | 49.53 | Poor                     | 42.41 |
| Birth order                          |       | Middle                   | 20.28 |
| 1                                    | 19.52 | Rich                     | 37.31 |
| 2 to 4                               | 48.09 | Age of household head    |       |
| 5 and above                          | 32.39 | Young-adults             | 43.08 |
| Perceived size at birth              |       | Middle-aged adults       | 43.76 |
| Large                                | 33.71 | Old-aged adults          | 13.16 |
| Average                              | 49.74 | Sex of household head    |       |
| Small                                | 16.54 | Male                     | 79.77 |
| Mother's characteristics             |       | Female                   | 20.23 |
| Maternal age                         |       | Access to electricity    |       |
| 15-19                                | 7.13  | No                       | 69.20 |
| 20-49                                | 92.87 | Yes                      | 30.80 |
| Educational attainment               |       | Type of toilet facility  |       |
| No education                         | 41.82 | Improved                 | 42.47 |
| Primary                              | 31.26 | Unimproved               | 57.53 |
| Secondary                            | 23.82 | Source of drinking water |       |
| Higher                               | 3.10  | Improved                 | 65.63 |
| Working status                       |       | Unimproved               | 34.37 |
| No                                   | 35.49 | Type of cooking fuel     |       |
| Yes                                  | 64.51 | Clean                    | 89.76 |
| Antenatal visits during pregnancy    |       | Unclean                  | 10.24 |
| No                                   | 10.76 | Geographic region        |       |
| Yes                                  | 89.24 | Western                  | 41.78 |
| Postnatal check within 2 months      |       | Eastern                  | 32.84 |
| No                                   | 58.49 | Central                  | 20.08 |
| Yes                                  | 41.51 | South Africa             | 5.30  |
| Access to media (tv/radio/newspaper) |       |                          |       |
| Yes                                  | 35.33 |                          |       |
| No                                   | 64.67 |                          |       |

(N=127,487)

598

599

600 Table 2: Prevalence and association of the co-existence of stunting, underweight and wasting with independent variables

| Variable                                    | Co-existed<br>Weighted %<br>(95% CI) | Variable                                  | Co-existed<br>Weighted % (95%<br>CI) | Variable                    | Co-existed<br>Weighted % (95% CI) |
|---------------------------------------------|--------------------------------------|-------------------------------------------|--------------------------------------|-----------------------------|-----------------------------------|
| <b>Age of child (p&lt;0.001)</b>            |                                      | <b>Place of delivery (p&lt;0.001)</b>     |                                      | <b>Country (p&lt;0.001)</b> |                                   |
| <1                                          | 1.75 (1.6-1.9)                       | Home                                      | 4.36 (4.2-4.6)                       | Angola                      | 2.46 (2.1-2.8)                    |
| 1                                           | 4.44 (4.2-4.7)                       | Health facility                           | 1.96 (1.9-2.1)                       | Benin                       | 2.04 (1.8-2.2)                    |
| 2                                           | 3.01 (2.8-3.2)                       | Other                                     | 2.45 (1.7-3.3)                       | Burkina Faso                | 5.31 (4.9-5.8)                    |
| 3                                           | 1.62 (1.4-1.8)                       | <b>Wealth status (p&lt;0.001)</b>         |                                      | Burundi                     | 3.76 (3.2-4.4)                    |
| 4                                           | 1.33 (1.1-1.6)                       | Poor                                      | 3.46 (3.3-3.6)                       | Cameroon                    | 1.27 (0.9-1.7)                    |
| <b>Sex of child (p&lt;0.001)</b>            |                                      | Middle                                    | 2.74 (2.5-2.9)                       | Chad                        | 5.86 (5.2-6.5)                    |
| Male                                        | 3.43 (3.3-3.6)                       | Rich                                      | 1.86 (1.7-2.0)                       | Comoros                     | 1.98 (1.3-2.9)                    |
| Female                                      | 1.99 (1.9-2.1)                       | <b>Age of household head (p = 0.2760)</b> |                                      | Congo                       | 0.98 (0.7-1.5)                    |
| <b>Birth order (p&lt;0.001)</b>             |                                      | Young-adults                              | 2.65 (2.5-2.8)                       | Cote d'Ivoire               | 2.28 (1.7-3.0)                    |
| 1                                           | 2.25 (2.1-2.4)                       | Middle-aged adults                        | 2.76 (2.6-2.9)                       | DR Congo                    | 2.66 (2.2-3.2)                    |
| 2 to 4                                      | 2.56 (2.4-2.7)                       | Old-aged adults                           | 2.8 (2.6-3.1)                        | Ethiopia                    | 3.64 (3.2-4.1)                    |
| 5 and above                                 | 3.23 (3.1-3.4)                       | <b>Sex of household head (p&lt;0.001)</b> |                                      | Gabon                       | 0.63 (0.3-1.0)                    |
| <b>Perceived size at birth (p&lt;0.001)</b> |                                      | Male                                      | 2.82 (2.7-2.9)                       | The Gambia                  | 3.61 (2.4-5.2)                    |
| Large                                       | 1.78 (1.7-1.9)                       | Female                                    | 2.33 (2.1-2.5)                       | Ghana                       | 1.37 (0.9-2.0)                    |
| Average                                     | 2.6 (2.5-2.7)                        | <b>Access to electricity (p&lt;0.001)</b> |                                      | Guinea                      | 2.26 (1.7-2.9)                    |
| Small                                       | 4.98 (4.7-5.3)                       | No                                        | 3.21 (3.1-3.3)                       | Kenya                       | 0.94 (0.7-1.2)                    |

|                                 |                                                       |                                             |                |                                       |
|---------------------------------|-------------------------------------------------------|---------------------------------------------|----------------|---------------------------------------|
| <b>Maternal age (P = 0.080)</b> | Yes                                                   | 1.61 (1.5-1.7)                              | Lesotho        | 0.86 (0.7-1.0)                        |
|                                 | <b>Access to media</b>                                |                                             |                |                                       |
| 15-19                           | 2.78 (2.5-3.1)                                        | <b>(tv/radio/newspaper) (p&lt;0.001)</b>    | Liberia        | 2.37 (1.7-3.1)                        |
| 20-49                           | 2.71 (2.6-2.8)                                        | Yes                                         | 2.14 (2.0-2.2) | Malawi                                |
|                                 | <b>Educational attainment</b>                         |                                             |                |                                       |
| <b>(p&lt;0.001)</b>             | No                                                    | 3.78 (3.6-4.0)                              | Mali           | 3.62 (2.5-4.1)                        |
| No education                    | 4.19 (4.0-4.4)                                        | <b>Type of toilet facility (p&lt;0.001)</b> | Namibia        | 1.99 (1.2-3.1)                        |
| Primary                         | 2.09 (2.0-2.2)                                        | Improved                                    | 1.76 (1.6-1.9) | Nigeria                               |
| Secondary                       | 1.22 (1.1-1.3)                                        | Unimproved                                  | 3.43 (3.3-3.6) | Rwanda                                |
|                                 | <b>Source of drinking water</b>                       |                                             |                |                                       |
| Higher                          | 0.66 (0.4-1.0)                                        | <b>(p&lt;0.001)</b>                         | Senegal        | 2.43 (1.8-3.2)                        |
|                                 | <b>Working status (p&lt;0.001)</b>                    |                                             |                |                                       |
|                                 | Improved                                              | 2.54 (2.4-2.6)                              | Sierra Leone   | 1.94 (1.4-2.5)                        |
| No                              | 3.13 (3.0-3.3)                                        | Unimproved                                  | 3.06 (2.9-3.2) | South Africa                          |
| Yes                             | 2.48 (2.4-2.6)                                        | <b>Type of cooking fuel (p&lt;0.001)</b>    | Tanzania       | 1.86 (2.1-3.5)                        |
|                                 | <b>Antenatal visits during pregnancy (p&lt;0.001)</b> |                                             |                |                                       |
|                                 | Clean                                                 | 0.98 (0.8-1.2)                              | Togo           | 2.72 (2.1-3.4)                        |
| No                              | 5.41 (5.0-5.8)                                        | Unclean                                     | 2.92 (2.8-3.0) | Uganda                                |
| Yes                             | 2.39 (2.3-2.5)                                        | <b>Urbanicity (p&lt;0.001)</b>              | Zambia         | 1.22 (1.0-1.5)                        |
|                                 | <b>Postnatal check within 2 months (p&lt;0.001)</b>   |                                             |                |                                       |
|                                 | Urban                                                 | 1.73 (1.6-1.9)                              | Zimbabwe       | 0.78 (0.5-1.1)                        |
| No                              | 2.93 (2.8-3.1)                                        | Rural                                       | 3.21 (3.1-3.3) | <b>Geographic region (p&lt;0.001)</b> |
| Yes                             | 2.42 (2.3-2.6)                                        |                                             |                | Western                               |
|                                 |                                                       |                                             |                | 3.11 (3.0-2.3)                        |
|                                 |                                                       |                                             |                | Eastern                               |
|                                 |                                                       |                                             |                | 2.43 (2.3-2.6)                        |
|                                 |                                                       |                                             |                | Central                               |
|                                 |                                                       |                                             |                | 2.87 (2.7-3.1)                        |
|                                 |                                                       |                                             |                | South                                 |
|                                 |                                                       |                                             |                | Africa                                |
|                                 |                                                       |                                             |                | 0.88 (0.66-1.1)                       |

601

602

603 Table 3: Multinomial regression showing risk factors of co-existence of stunting, underweight, and wasting

| Variable                                            | Base outcome (Ref: Normal) |        |       |                                  |        |       |
|-----------------------------------------------------|----------------------------|--------|-------|----------------------------------|--------|-------|
|                                                     | Single and two dimensions  |        |       | Co-existence of three-dimensions |        |       |
|                                                     | RRR                        | 95% CI |       | RRR                              | 95% CI |       |
| <b>Age of child (Ref:0)</b>                         |                            |        |       |                                  |        |       |
| 1                                                   | 2.008***                   | 1.93   | 2.089 | 3.714***                         | 3.319  | 4.156 |
| 2                                                   | 2.624***                   | 2.514  | 2.739 | 2.827***                         | 2.48   | 3.222 |
| 3                                                   | 2.122***                   | 2.018  | 2.231 | 1.464***                         | 1.227  | 1.748 |
| 4                                                   | 1.504***                   | 1.417  | 1.597 | 1.051                            | 0.84   | 1.315 |
| <b>Sex of child (Ref: Male)</b>                     |                            |        |       |                                  |        |       |
| Female                                              | 0.752***                   | 0.731  | 0.775 | 0.468***                         | 0.429  | 0.51  |
| <b>Birth order (Ref: 1)</b>                         |                            |        |       |                                  |        |       |
| 2                                                   | 0.938**                    | 0.896  | 0.981 | 1.002                            | 0.875  | 1.146 |
| 5 and above                                         | 0.969                      | 0.92   | 1.021 | 0.995                            | 0.858  | 1.155 |
| <b>Perceived size at birth (Ref: Large)</b>         |                            |        |       |                                  |        |       |
| Average                                             | 1.32***                    | 1.276  | 1.365 | 1.756***                         | 1.574  | 1.958 |
| Small                                               | 1.931***                   | 1.846  | 2.02  | 3.818***                         | 3.383  | 4.308 |
| <b>Maternal age (Ref: 15-19)</b>                    |                            |        |       |                                  |        |       |
| 20-49                                               | 0.834***                   | 0.78   | 0.891 | 0.881                            | 0.735  | 1.056 |
| <b>Educational attainment (Ref: Higher)</b>         |                            |        |       |                                  |        |       |
| No education                                        | 2.624***                   | 2.305  | 2.987 | 3.291***                         | 1.961  | 5.522 |
| Primary                                             | 2.189***                   | 1.927  | 2.487 | 2.381***                         | 1.417  | 4.001 |
| Secondary                                           | 1.751***                   | 1.545  | 1.985 | 1.617                            | 0.971  | 2.691 |
| <b>Working status (Ref: Yes)</b>                    |                            |        |       |                                  |        |       |
| No                                                  | 1.018                      | 0.984  | 1.053 | 1.195***                         | 1.086  | 1.314 |
| <b>Antenatal visits during pregnancy (Ref: Yes)</b> |                            |        |       |                                  |        |       |
| No                                                  | 1.139***                   | 1.079  | 1.201 | 1.364***                         | 1.208  | 1.541 |
| <b>Postnatal check within 2 months (Ref: Yes)</b>   |                            |        |       |                                  |        |       |
| No                                                  | 0.98                       | 0.946  | 1.015 | 0.977                            | 0.879  | 1.086 |
| <b>Place of delivery (Ref: Health facility)</b>     |                            |        |       |                                  |        |       |

|                                                        |          |       |       |          |       |       |
|--------------------------------------------------------|----------|-------|-------|----------|-------|-------|
| Home                                                   | 1.183*** | 1.137 | 1.23  | 1.372*** | 1.232 | 1.529 |
| Other                                                  | 1.046    | 0.912 | 1.201 | 1.047    | 0.71  | 1.543 |
| <b>Wealth status (Ref: Rich)</b>                       |          |       |       |          |       |       |
| Poor                                                   | 1.297*** | 1.235 | 1.361 | 1.408*** | 1.235 | 1.605 |
| Middle                                                 | 1.195*** | 1.138 | 1.254 | 1.214**  | 1.054 | 1.397 |
| <b>Age of household head (Ref: Young-adult)</b>        |          |       |       |          |       |       |
| Middle-aged adults                                     | 0.954**  | 0.921 | 0.987 | 1.01     | 0.913 | 1.118 |
| Old-aged adults                                        | 0.974    | 0.93  | 1.021 | 1.065    | 0.936 | 1.213 |
| <b>Sex of household head (Ref: Male)</b>               |          |       |       |          |       |       |
| Female                                                 | 0.977    | 0.94  | 1.015 | 1.035    | 0.925 | 1.159 |
| <b>Access to media (tv/radio/newspaper) (Ref: Yes)</b> |          |       |       |          |       |       |
| No                                                     | 1.079*** | 1.042 | 1.117 | 1.255*** | 1.144 | 1.377 |
| <b>Access to electricity (Ref: Yes)</b>                |          |       |       |          |       |       |
| No                                                     | 1.136*** | 1.083 | 1.191 | 1.062    | 0.922 | 1.225 |
| <b>Type of toilet facility (Ref: Improved)</b>         |          |       |       |          |       |       |
| Unimproved                                             | 1.027    | 0.991 | 1.065 | 1.158**  | 1.032 | 1.3   |
| <b>Source of drinking water (Ref: Improved)</b>        |          |       |       |          |       |       |
| Unimproved                                             | 0.959**  | 0.928 | 0.99  | 0.968    | 0.885 | 1.058 |
| <b>Type of cooking fuel (Ref: Clean)</b>               |          |       |       |          |       |       |
| Unclean                                                | 1.177*** | 1.089 | 1.271 | 1.316    | 0.97  | 1.787 |
| <b>Urbanicity (Ref: Urban)</b>                         |          |       |       |          |       |       |
| Rural                                                  | 1.05**   | 1.006 | 1.095 | 0.943    | 0.832 | 1.069 |

604

605





Figure 1: Percentage distribution of co-existence of stunting, underweight, and wasting (SUW) in children from the 31 study countries in SSA



**Figure 2:** Percentage distribution of co-existence of stunting, underweight, and wasting (SUW) in children by regions of SSA

## Supplementary Tables

**Appendix 1: Distribution of sample by country**

| Country       | Survey year | n      | %     |
|---------------|-------------|--------|-------|
| Angola        | 2015-16     | 7,318  | 5.74  |
| Benin         | 2017-18     | 15,473 | 12.14 |
| Burkina Faso  | 2010        | 8,908  | 6.99  |
| Burundi       | 2016-17     | 4,172  | 3.27  |
| Cameroon      | 2018        | 2,911  | 2.28  |
| Chad          | 2014-2015   | 5,999  | 4.71  |
| Comoros       | 2012        | 1,320  | 1.03  |
| Congo         | 2013        | 2,609  | 2.05  |
| Cote d'Ivoire | 2011-12     | 2,174  | 1.71  |
| Congo DR      | 2013-14     | 4,806  | 3.77  |
| Ethiopia      | 2016        | 6,573  | 5.16  |
| Gabon         | 2012        | 1,960  | 1.54  |
| Gambia        | 2013        | 743    | 0.58  |
| Ghana         | 2014        | 1,896  | 1.49  |
| Guinea        | 2018        | 2,237  | 1.75  |
| Kenya         | 2014        | 6,066  | 4.76  |
| Lesotho       | 2014        | 1,012  | 0.79  |
| Liberia       | 2013        | 1,946  | 1.53  |
| Malawi        | 2015-16     | 4,027  | 3.16  |
| Mali          | 2018        | 5,653  | 4.43  |
| Namibia       | 2013        | 905    | 0.71  |
| Nigeria       | 2018        | 7,379  | 5.79  |
| Rwanda        | 2014-15     | 4,408  | 3.46  |
| Senegal       | 2010-11     | 1,944  | 1.52  |
| Sierra Leone  | 2019        | 2,689  | 2.11  |
| South Africa  | 2016        | 855    | 0.67  |
| Tanzania      | 2015-16     | 6,061  | 4.75  |
| Togo          | 2013-14     | 2,220  | 1.74  |
| Uganda        | 2016        | 2,891  | 2.27  |
| Zambia        | 2018        | 6,347  | 4.98  |
| Zimbabwe      | 2015        | 3,987  | 3.13  |

| Appendix 2: Multicollinearity diagnosis |      |          |           |           |
|-----------------------------------------|------|----------|-----------|-----------|
| Variable                                | VIF  | SQRT VIF | Tolerance | R-Squared |
| Age of child                            | 1.05 | 1.02     | 0.9547    | 0.0453    |
| Sex of child                            | 1.01 | 1        | 0.9948    | 0.0052    |
| Birth order                             | 1.36 | 1.17     | 0.7366    | 0.2634    |
| Perceived size at birth                 | 1.02 | 1.01     | 0.9798    | 0.0202    |
| Age at child birth                      | 1.22 | 1.1      | 0.8224    | 0.1776    |
| Educational attainment                  | 1.51 | 1.23     | 0.664     | 0.336     |
| Working status                          | 1.07 | 1.03     | 0.9357    | 0.0643    |
| Antenatal visits during pregnancy       | 1.25 | 1.12     | 0.7976    | 0.2024    |
| Postnatal check within 2 months         | 1.1  | 1.05     | 0.9098    | 0.0902    |
| Place of delivery                       | 1.31 | 1.15     | 0.7617    | 0.2383    |
| Wealth status                           | 1.8  | 1.34     | 0.5554    | 0.4446    |
| Age of household head                   | 1.05 | 1.02     | 0.9546    | 0.0454    |
| Sex of household head                   | 1.03 | 1.02     | 0.9702    | 0.0298    |
| Access to media (tv/radio/newspaper)    | 1.26 | 1.12     | 0.7913    | 0.2087    |
| Access to electricity                   | 1.71 | 1.31     | 0.5837    | 0.4163    |
| Type of toilet facility                 | 1.35 | 1.16     | 0.7404    | 0.2596    |
| Source of drinking water                | 1.09 | 1.04     | 0.9191    | 0.0809    |
| Type of cooking fuel                    | 1.31 | 1.14     | 0.7653    | 0.2347    |
| Urbanicity                              | 1.58 | 1.26     | 0.6319    | 0.3681    |
| Country                                 | 1.17 | 1.08     | 0.8579    | 0.1421    |
| Mean VIF                                | 1.26 |          |           |           |

## Appendix 3: Country-level risk of co-existence of stunting, wasting, and underweight

| Country (Ref: Angola) | Base outcome (Ref: Normal) |        |       |                                  |        |       |
|-----------------------|----------------------------|--------|-------|----------------------------------|--------|-------|
|                       | Single and two dimensions  |        |       | Co-existence of three-dimensions |        |       |
|                       | RRR                        | 95% CI |       | RRR                              | 95% CI |       |
| Benin                 | 0.651***                   | 0.598  | 0.708 | 0.625***                         | 0.489  | 0.798 |
| Burkina Faso          | 0.952                      | 0.866  | 1.046 | 1.946***                         | 1.526  | 2.481 |
| Burundi               | 1.580***                   | 1.424  | 1.753 | 2.049***                         | 1.545  | 2.718 |
| Cameroon              | 0.669***                   | 0.593  | 0.756 | 0.398***                         | 0.261  | 0.609 |
| Chad                  | 0.910                      | 0.823  | 1.007 | 1.505**                          | 1.184  | 1.913 |
| Comoros               | 0.883                      | 0.745  | 1.046 | 0.656                            | 0.378  | 1.138 |
| Congo                 | 0.674***                   | 0.580  | 0.783 | 0.472**                          | 0.279  | 0.800 |
| Cote d'Ivoire         | 0.734***                   | 0.638  | 0.844 | 0.739                            | 0.492  | 1.109 |
| DR Congo              | 1.229***                   | 1.100  | 1.373 | 1.351                            | 0.988  | 1.847 |
| Ethiopia              | 0.810***                   | 0.726  | 0.904 | 0.813                            | 0.604  | 1.095 |
| Gabon                 | 0.495***                   | 0.415  | 0.59  | 0.319**                          | 0.128  | 0.796 |
| Gambia                | 0.732**                    | 0.603  | 0.889 | 1.001                            | 0.618  | 1.620 |
| Ghana                 | 0.453***                   | 0.386  | 0.531 | 0.545**                          | 0.346  | 0.857 |
| Guinea                | 0.798***                   | 0.705  | 0.904 | 0.726                            | 0.509  | 1.036 |
| Kenya                 | 0.553***                   | 0.498  | 0.615 | 0.321***                         | 0.230  | 0.449 |
| Lesotho               | 0.777**                    | 0.654  | 0.924 | 0.369***                         | 0.177  | 0.772 |
| Liberia               | 0.658***                   | 0.565  | 0.768 | 0.776                            | 0.484  | 1.243 |
| Malawi                | 0.794***                   | 0.708  | 0.889 | 0.447***                         | 0.291  | 0.687 |
| Mali                  | 0.600***                   | 0.541  | 0.664 | 1.006                            | 0.769  | 1.316 |
| Namibia               | 0.680***                   | 0.568  | 0.815 | 0.849                            | 0.505  | 1.426 |
| Nigeria               | 0.953                      | 0.868  | 1.046 | 1.527**                          | 1.183  | 1.972 |
| Rwanda                | 1.059                      | 0.954  | 1.176 | 1.991***                         | 1.541  | 2.571 |
| Senegal               | 0.660***                   | 0.572  | 0.761 | 0.643*                           | 0.434  | 0.952 |
| Sierra Leone          | 0.641***                   | 0.567  | 0.725 | 0.656*                           | 0.447  | 0.963 |
| South Africa          | 0.788*                     | 0.634  | 0.979 | 0.108***                         | 0.033  | 0.352 |
| Tanzania              | 0.772***                   | 0.699  | 0.851 | 0.699**                          | 0.512  | 0.954 |
| Togo                  | 0.557***                   | 0.490  | 0.633 | 0.838                            | 0.590  | 1.190 |
| Uganda                | 0.627***                   | 0.556  | 0.708 | 0.421***                         | 0.278  | 0.637 |
| Zambia                | 0.904*                     | 0.818  | 0.998 | 0.519***                         | 0.366  | 0.736 |
| Zimbabwe              | 0.693***                   | 0.620  | 0.775 | 0.344***                         | 0.214  | 0.554 |

# BMJ Open

## Risk factors associated with the co-existence of stunting, underweight, and wasting in children under five from 31 sub-Saharan African countries

|                                 |                                                                                                                                                                                                                                                                                                                                                                                                                                                                                                                                                                                                                                                                                                                                                                                                                                                                                                                                                                                                                                                                                                                                                                                                                                                                                                                                                                                                                                                                                                                                                                                                                                                                                                                                                                                                                                              |
|---------------------------------|----------------------------------------------------------------------------------------------------------------------------------------------------------------------------------------------------------------------------------------------------------------------------------------------------------------------------------------------------------------------------------------------------------------------------------------------------------------------------------------------------------------------------------------------------------------------------------------------------------------------------------------------------------------------------------------------------------------------------------------------------------------------------------------------------------------------------------------------------------------------------------------------------------------------------------------------------------------------------------------------------------------------------------------------------------------------------------------------------------------------------------------------------------------------------------------------------------------------------------------------------------------------------------------------------------------------------------------------------------------------------------------------------------------------------------------------------------------------------------------------------------------------------------------------------------------------------------------------------------------------------------------------------------------------------------------------------------------------------------------------------------------------------------------------------------------------------------------------|
| Journal:                        | <i>BMJ Open</i>                                                                                                                                                                                                                                                                                                                                                                                                                                                                                                                                                                                                                                                                                                                                                                                                                                                                                                                                                                                                                                                                                                                                                                                                                                                                                                                                                                                                                                                                                                                                                                                                                                                                                                                                                                                                                              |
| Manuscript ID                   | bmjopen-2021-052267.R4                                                                                                                                                                                                                                                                                                                                                                                                                                                                                                                                                                                                                                                                                                                                                                                                                                                                                                                                                                                                                                                                                                                                                                                                                                                                                                                                                                                                                                                                                                                                                                                                                                                                                                                                                                                                                       |
| Article Type:                   | Original research                                                                                                                                                                                                                                                                                                                                                                                                                                                                                                                                                                                                                                                                                                                                                                                                                                                                                                                                                                                                                                                                                                                                                                                                                                                                                                                                                                                                                                                                                                                                                                                                                                                                                                                                                                                                                            |
| Date Submitted by the Author:   | 11-Nov-2021                                                                                                                                                                                                                                                                                                                                                                                                                                                                                                                                                                                                                                                                                                                                                                                                                                                                                                                                                                                                                                                                                                                                                                                                                                                                                                                                                                                                                                                                                                                                                                                                                                                                                                                                                                                                                                  |
| Complete List of Authors:       | <p>Amadu, Iddrisu; University of Cape Coast, Africa Centre of Excellence in Coastal Resilience, University of Cape Coast, Cape Coast, Ghana;<br/> University of Cape Coast, Department of Fisheries and Aquatic Sciences, School of Biological Sciences, College of Agriculture and Natural Sciences, University of Cape Coast, Ghana</p> <p>Seidu, Abdul-Aziz; University of Cape Coast, Department of Population and Health; James Cook University, College of Public Health, Medical and Veterinary Sciences, James Cook University, Townsville, Queensland, Australia</p> <p>Duku, Eric; University of Cape Coast, Africa Centre of Excellence in Coastal Resilience, University of Cape Coast, Cape Coast, Ghana;<br/> University of Cape Coast, Department of Fisheries and Aquatic Sciences, School of Biological Sciences, College of Agriculture and Natural Sciences, University of Cape Coast, Ghana</p> <p>Boadu Frimpong, James; University of Cape Coast, Department of Health, Physical Education, and Recreation, University of Cape Coast, Cape Coast, Ghana</p> <p>Hagan Jnr., John; University of Cape Coast, Department of Health, Physical Education, and Recreation, University of Cape Coast, Cape Coast, Ghana</p> <p>Aboagye, Richard ; University of Health and Allied Sciences, School of Public Health, University of Health and Allied Sciences, Ho, Ghana</p> <p>Ampah, Belinda; Nursing and Midwifery Training College, Department of Academics, Nursing and Midwifery Training College, P.O.Box, 7, Esiama, Ghana</p> <p>Adu, Collins; Kwame Nkrumah University of Science and Technology, Department of Health Promotion and Disability Studies</p> <p>Ahinkorah, Bright; University of Technology Sydney, School of Public Health, Faculty of Health, University of Technology Sydney, NSW, Australia.</p> |
| <b>Primary Subject Heading</b>: | Public health                                                                                                                                                                                                                                                                                                                                                                                                                                                                                                                                                                                                                                                                                                                                                                                                                                                                                                                                                                                                                                                                                                                                                                                                                                                                                                                                                                                                                                                                                                                                                                                                                                                                                                                                                                                                                                |
| Secondary Subject Heading:      | Health services research, Health policy, Global health                                                                                                                                                                                                                                                                                                                                                                                                                                                                                                                                                                                                                                                                                                                                                                                                                                                                                                                                                                                                                                                                                                                                                                                                                                                                                                                                                                                                                                                                                                                                                                                                                                                                                                                                                                                       |
| Keywords:                       | Public health < INFECTIOUS DISEASES, Epidemiology < TROPICAL MEDICINE, Child protection < PAEDIATRICS                                                                                                                                                                                                                                                                                                                                                                                                                                                                                                                                                                                                                                                                                                                                                                                                                                                                                                                                                                                                                                                                                                                                                                                                                                                                                                                                                                                                                                                                                                                                                                                                                                                                                                                                        |

1  
2  
3  
4  
5  
6  
7  
8  
9  
10  
11  
12  
13  
14  
15  
16  
17  
18  
19  
20  
21  
22  
23  
24  
25  
26  
27  
28  
29  
30  
31  
32  
33  
34  
35  
36  
37  
38  
39  
40  
41  
42  
43  
44  
45  
46  
47  
48  
49  
50  
51  
52  
53  
54  
55  
56  
57  
58  
59  
60



SCHOLARONE™  
Manuscripts



I, the Submitting Author has the right to grant and does grant on behalf of all authors of the Work (as defined in the below author licence), an exclusive licence and/or a non-exclusive licence for contributions from authors who are: i) UK Crown employees; ii) where BMJ has agreed a CC-BY licence shall apply, and/or iii) in accordance with the terms applicable for US Federal Government officers or employees acting as part of their official duties; on a worldwide, perpetual, irrevocable, royalty-free basis to BMJ Publishing Group Ltd ("BMJ") its licensees and where the relevant Journal is co-owned by BMJ to the co-owners of the Journal, to publish the Work in this journal and any other BMJ products and to exploit all rights, as set out in our [licence](#).

The Submitting Author accepts and understands that any supply made under these terms is made by BMJ to the Submitting Author unless you are acting as an employee on behalf of your employer or a postgraduate student of an affiliated institution which is paying any applicable article publishing charge ("APC") for Open Access articles. Where the Submitting Author wishes to make the Work available on an Open Access basis (and intends to pay the relevant APC), the terms of reuse of such Open Access shall be governed by a Creative Commons licence – details of these licences and which [Creative Commons](#) licence will apply to this Work are set out in our licence referred to above.

Other than as permitted in any relevant BMJ Author's Self Archiving Policies, I confirm this Work has not been accepted for publication elsewhere, is not being considered for publication elsewhere and does not duplicate material already published. I confirm all authors consent to publication of this Work and authorise the granting of this licence.



1  
2  
3 **1 Risk factors associated with the co-existence of stunting, underweight, and wasting in**  
4 **2 children under five from 31 sub-Saharan African countries**

6 3 Iddrisu Amadu<sup>1,2,3</sup>, Abdul-Aziz Seidu<sup>4,5,6</sup>, Eric Duku<sup>1,2</sup>, James Boadu Frimpong<sup>7</sup>, John Elvis  
7 Hagan Jr<sup>7,8</sup>, Richard Gyan Aboagye<sup>9</sup>, Belinda Ampah<sup>10</sup>, Collins Adu<sup>11</sup>, Bright Opoku  
8 Ahinkorah<sup>12</sup>  
9  
10 6

- 12 7 1. Africa Centre of Excellence in Coastal Resilience, University of Cape Coast, Cape  
13 8 Coast, Ghana  
14 9 2. Department of Fisheries and Aquatic Sciences, School of Biological Sciences,  
15 10 College of Agriculture and Natural Sciences, University of Cape Coast, Ghana  
16 11 3. Emperiks Research, NToo85, Tamale, Ghana  
17 12 4. Department of Population and Health, College of Humanities and Legal Studies,  
18 13 University of Cape Coast, Ghana.  
19 14 5. College of Public Health, Medical and Veterinary Sciences, James Cook University,  
20 15 Townsville, Queensland, Australia  
21 16 6. Department of Estate Management, Takoradi Technical University, Takoradi,  
22 17 Ghana  
23 18 7. Department of Health, Physical Education, and Recreation, University of Cape  
24 19 Coast, Cape Coast, Ghana  
25 20 8. Neurocognition and Action-Biomechanics-Research Group, Faculty of Psychology  
26 21 and Sport Sciences, Bielefeld University, Bielefeld-Germany  
27 22 9. School of Public Health, University of Health and Allied Sciences, Ho, Ghana  
28 23 10. Department of Academics, Nursing and Midwifery Training College, P.O.Box, 7,  
29 24 Esiama, Ghana  
30 25 11. Department of Health Promotion, Education and Disability Studies, Kwame  
31 26 Nkrumah University of Science and Technology, Kumasi, Ghana  
32 27 12. School of Public Health, Faculty of Health, University of Technology Sydney, NSW,  
33 28 Australia.

39 **29 Email addresses**

41 30 IA: iddrisu.amadu@stu.ucc.edu.gh  
42 31 \*AS: abdul-aziz.seidu@stu.ucc.edu.gh  
43 32 ED: eric.duku@stu.ucc.edu.gh  
44 33 JBF: frimpongboadujames@gmail.com  
45 34 JEH: elvis.hagan@ucc.edu.gh  
46 35 RGA: raboagye18@sph.uhas.edu.gh  
47 36 BA: [oyebel@gmail.com](mailto:oyebel@gmail.com)  
48 37 CA: collinsadu80@yahoo.com  
49 38 BOA: brightahinkorah@gmail.com  
50  
51  
52  
53

54 **40 Correspondence to:**

56 41 Abdul-Aziz Seidu, Department of Population and Health, University of Cape Coast, PMB TF0494,  
57 42 Cape Coast, Ghana, Email:abdul-aziz.seidu@stu.ucc.edu.gh  
58  
59  
60

## 44 ABSTRACT

45 **Objective:** This study investigated the risk factors associated with the co-existence of  
46 stunting, underweight, and wasting among children under age five in sub-Saharan Africa  
47 (SSA).

48 **Design:** Data of 127,487 under-five children from 31 sub-Saharan African countries were  
49 pooled from the Demographic and Health Surveys collected between 2010 and 2019. We  
50 examined the risk of co-existence of undernutrition using multinomial logistic regression  
51 models, with results presented as relative risk ratios (RRR).

52 **Setting:** Thirty-one sub-Saharan African countries.

53 **Participants:** Children under age five

54 **Outcome measures:** The outcome variables were three child anthropometrics: stunting  
55 (height-for-age z-scores); underweight (weight-for-age z-scores); and wasting (weight-for-  
56 height z-scores).

57 **Results:** The prevalence of co-existence of stunting, underweight, and wasting varied  
58 across countries and sub-regions, with the highest and lowest prevalence of co-existence  
59 of stunting, underweight, and wasting as Benin (12.14%) and Gambia (0.58%) respectively.  
60 The risk of co-existence of the three undernutrition dimensions was higher among children  
61 aged 1 year (RRR=3.714; 95%CI 3.319-4.156) compared to those aged 0. The risk of co-  
62 existence of the three dimensions was lower among female children (RRR=0.468 95% CI  
63 0.420-0.51) but higher for those with small size at birth (RRR=3.818; CI 3.383-4.308), those  
64 whose mothers had no education (RRR=3.291; 95% CI 1.961-5.522), not working (RRR=1.195;  
65 95% CI 1.086-1.314), had no antenatal visits during pregnancy (RRR=1.364; 95% CI 1.20-1.541),  
66 children delivered at home (RRR=1.372; CI 1.232-1.529), those from poor households  
67 (RRR=1.408; 95% CI 1.235-1.605), those whose mothers had no access to media (RRR=1.255;  
68 95% CI 1.144-1.377), and living in households with an unimproved toilet facility (RRR=1.158;  
69 95% CI 1.032-1.300).

70 **Conclusions:** Findings suggest the urgent need for consideration of the co-existence of  
71 stunting, wasting and underweight among under-five children in policy design and  
72 programming of interventions to eradicate child malnutrition in SSA. In the short-term,  
73 national-level policies and interventions need to be well-tailored considering the  
74 compositional characteristics.

75 **Keywords:** co-existence; stunting; underweight; wasting; children under five; sub-Saharan  
76 Africa

1  
2  
3 77  
4  
5  
6  
7  
8  
9  
10  
11  
12  
13  
14  
15  
16  
17  
18  
19  
20  
21  
22  
23  
24  
25  
26  
27  
28  
29  
30  
31  
32  
33  
34  
35  
36  
37  
38  
39  
40  
41  
42  
43  
44  
45  
46

### ***Strength and Limitations***

- Nationally representative data of under-five children from 31 SSA countries were analysed.
- Multinomial logistic regression was used to assess the risks factors to the co-existence of stunting, wasting and underweight in children.
- A broad range of potential risk factors a various levels were considered.
- Also, the DHS employs cross-sectional designs which restrict causality on the noted outcomes.
- Self-reported variables used are susceptible to biases from recall and other social desirability issues.

47 78

48  
49 7950  
51 8052  
53 8154  
55 8256  
57 83

58 84

59  
60

## 85 INTRODUCTION

86 Undernutrition among children under 5 years remains a major public health problem  
87 across many low-and middle-income countries<sup>1-3</sup>. Factors such as insufficient food intake,  
88 diarrhoea, recurring infections, poor sanitation practices, and low parental education have  
89 been identified as significant contributors to the high prevalence of undernutrition during  
90 childhood<sup>4,5</sup>. Despite the numerous interventions rolled out to address childhood  
91 undernutrition especially in sub-Saharan Africa where the phenomenon is quite pervasive,  
92 the progress seems to be insignificant<sup>6,7</sup>. For example, a study reported that child  
93 undernutrition accounted for nearly half (45%) of the child mortality rate in low-and middle-  
94 income countries<sup>8</sup>. Aside from that, it was reported in 2018 that about 149 million and 49  
95 million children under age 5 were stunted and wasted respectively<sup>9</sup>.

96 Three main indicators that are often used to represent undernutrition are underweight or  
97 low weight for age, stunting or low height for age, and wasting or low weight for height<sup>2,10-</sup>  
98 <sup>12</sup>. Among the three indicators of undernutrition, stunting has been identified as the  
99 problem with the greatest magnitude among under 5 children in developing countries<sup>2,3</sup>.  
100 Even though the prevalence of stunting in sub-Saharan Africa is declining, it is worth noting  
101 that it is still above 30%<sup>13</sup> which is undeniably high. Research also indicates that the country-  
102 specific prevalence of stunting, underweight and wasting is still high<sup>2,3</sup>. For instance, in  
103 Ethiopia, the prevalence of wasting and stunting were 10% and 38% respectively<sup>14</sup>.  
104 Additionally, the prevalence of stunting, underweight and wasting among children in  
105 South Africa were 35.8%, 20.5%, and 17.2%<sup>3</sup>. Likewise, Anin et al.<sup>2</sup> reported 33.2%, 14.1%, 27%  
106 and 2.6% of prevalence in stunting, wasting, underweight and overweight among infants  
107 (6-23 months) across Northern Ghana.

108 Previous studies have investigated the compositional and contextual risk factors  
109 associated with either stunting, underweight or wasting among children under 5 years and  
110 found the age of a child, sex of the child, child's size at birth, mother's age during  
111 childbirth, mother's educational level, birth order, place of residence and mother's body  
112 mass index (BMI) as associated factors<sup>1-3,15,16</sup>. Other studies also found a significant linkage  
113 between household wealth quintile and maternal short stature, and nutritional status of  
114 children under 5<sup>17,18</sup>. Regarding the sex of a child, for example, female children were found  
115 to be less likely to suffer from stunting compared to males<sup>1,3</sup>.

116 Apart from studies that have examined the factors associated with either stunting,  
117 underweight, and wasting, some scholars have begun looking at predictors of the co-  
118 existence of any two or three of the indicators of malnutrition. A study in 84 countries that  
119 examined the prevalence and predictors of co-existence of stunting and wasting found  
120 sex and age of children as significant predictors<sup>19</sup>. Other studies in Ghana<sup>20</sup> and India<sup>21</sup> also  
121 examined the co-existence of stunting, underweight, and wasting and found birth interval,  
122 birth weight, dietary diversity, place of delivery, wealth index, mother's BMI, mother's  
123 educational level, and partners' educational level as associated factors. The need to  
124 examine the co-existence of stunting, underweight and wasting is important because not  
125 much work has been done on that subject and hence children who concurrently suffer  
126 from stunting, underweight, and wasting are less likely to be reached in malnutrition  
127 prevention programmes, especially in SSA. For instance, some scholars have indicated that  
128 despite evidence that wasting and stunting are global public health problems that  
129 frequently co-exist, they are usually separated in terms of policy, guidance, programming

1  
2  
3 130 and financing<sup>22</sup>. This creates a gap in the literature that needs to be filled. Despite the  
4 131 detrimental consequences of undernutrition on the health and wellbeing of children under  
5 132 5 in SSA, studies utilizing current, and nationally representative data to investigate the risk  
6 133 factors associated with the co-existence of stunting, underweight, and wasting among this  
7 134 age group are absent in the literature. Studies presenting empirical analyses of the co-  
8 135 existence of these three indicators of child undernutrition in SSA are absent in extant  
9 136 literature making it difficult for policymakers and nutritional experts to provide up-to-date  
10 137 trends with appropriate strategies to curb the situation in the sub-region. This research lag  
11 138 presents a void in extant literature which this study seeks to bridge. Therefore, the study  
12 139 investigated the risk factors of the co-existence of stunting, underweight, and wasting  
13 140 among children under age 5 in sub-Saharan Africa using data from the Demographic Health  
14 141 Survey (DHS) conducted in 31 countries between 2010 and 2019. The findings of the study  
15 142 could contribute to the formulation of policies and interventions to respond to the  
16 143 nutritional needs of children under 5 years and also suggest pragmatic ways of reducing  
17 144 undernutrition among children in the sub-region.  
18  
19  
20  
21  
22  
23

145

## 146 **METHODS**

### 147 **Data Source**

148 The dataset included 127,487 children under the age of 5 years from 31 sub-Saharan African  
149 countries (Figure 1) were pooled from the most current Demographic and Health Surveys  
150 (DHS) conducted between 2010 and 2019 (Appendix 1). Specifically, the data were pooled  
151 from the children's files in each of the countries. The DHS Program has conducted over  
152 400 surveys in over 90 developing countries around the world since 1984 every five years<sup>23</sup>.  
153 The program implements cross-sectional surveys to gather nationally-representative data,  
154 analyze and disseminate accurate information on important demographic and health  
155 indicators spanning population, nutrition, and diseases. For all surveys, standardized  
156 protocols designed for each target group including children, women, and men at the  
157 household level are employed to allow for cross-national comparisons. Stratified two-  
158 stage sampling involves first, the listing of enumeration areas and selection of clusters,  
159 and then a random selection of households in each cluster. The detailed sampling method  
160 can be found in a previous study<sup>24</sup>. The dataset is freely available for download at:  
161 <https://dhsprogram.com/data/available-datasets.cfm><sup>25</sup>. The Strengthening Reporting of  
162 Observational Studies in Epidemiology (STROBE) guidelines were followed in writing the  
163 manuscript<sup>26</sup>.

### 164 **Study Variables**

#### 165 **Outcome Variable**

166 The outcome variable considered in this study is derived from three child anthropometric  
167 variables including stunting (height-for-age z-scores); underweight (weight-for-age z-  
168 scores) and wasting (weight-for-height z-scores). The DHS (2021) specifies categorization  
169 for each of these variables following the WHO child growth standard. Each of the three  
170 variables we coded into "0" for "Normal" and "1" for "Stunting", "underweight" and  
171 "Wasting" respectively.  
172

1  
2  
3 172 These three variables were then added to generate the outcome variable “Co-existed  
4 173 undernutrition” with scores (discrete) ranging from 0 to 3 where 0 implies “Normal”, that  
5 174 is, children with none of the three conditions; 1 implies “Single burden”, that is, the child  
6 175 suffers from one of the three conditions; 2 indicates that child suffers from “Two burdens”  
7 176 out of the three; and 3 shows “Co-existed”, that is, the child suffers from all three  
8 177 conditions of undernutrition. For parsimony, children who suffered from “Single burden”  
9 178 and those who suffered from “Two burdens” were added resulting in the variable “Co-  
10 179 existed undernutrition” with three response categories: 0=Normal; 1=One or two burdens;  
11 180 and 3=co-existed.

### 15 181 **Independent Variables**

16  
17 182 Several risk factors spanning compositional to contextual factors have been associated  
18 183 with child undernutrition. The relevant biosocial characteristics and sociocultural factors  
19 184 related to the child, mother, household head and the household together form  
20 185 compositional factors<sup>27,28</sup>. Factors that describe location or “place-based” variables are  
21 186 contextual factors<sup>20,27,29,30</sup>. The relevant compositional factors considered include the age  
22 187 of the child; sex of the child; birth order of child; perceived size at birth; mother’s age;  
23 188 educational attainment; working status; antenatal visits during pregnancy; postnatal  
24 189 check within 2 months; and place of delivery. At the household level, relevant variables  
25 190 included are the wealth status; the age of household head; sex of household head (male  
26 191 and female); access to electricity; and access to media which was derived from the three  
27 192 variables “access to television”, “radio” and “newspaper”. Household basic needs include  
28 193 the type of toilet facility (re-coded into “improved” and unimproved”<sup>29</sup>; source of drinking  
29 194 water (re-coded as “improved” and “unimproved”<sup>29</sup>, and type of household cooking fuel  
30 195 (re-coded into “clean” and “unclean”<sup>29,31</sup> are also considered. The contextual factors  
31 196 considered are urbanicity and the country of origin of the participant.

### 36 197 **Data Analyses**

37  
38 198 The statistical analysis of the data was performed using the Stata SE software version 14.2.  
39 199 The “svyset” command was first used to declare the data as survey data to prevent the  
40 200 potential effects of the complex sampling techniques on the analyses. The sample weight  
41 201 variable in the DHS was used to provide weighted samples in the analyses. To understand  
42 202 the distributions of the variables, the data were summarized and presented in tables using  
43 203 descriptive statistics (frequencies, weighted percentages, and 95% confidence intervals  
44 204 (CIs) of percentages). We further integrated the data into a GIS environment and  
45 205 presented the distribution of key variables across the study countries and geographic  
46 206 regions in map images (Figure 1 and Figure 2). This approach enhances the visualization of  
47 207 the data and understanding of the context of the study. The associations between the co-  
48 208 existence of undernutrition and each of the risk factors considered were assessed using  
49 209 the chi-square test of independence, with results presented in a contingency table. The  
50 210 risk factors as independent variables were then subjected to collinearity diagnosis tests,  
51 211 including Variance Inflation Factors (VIF), Square VIF, Tolerance, and R-squared. This was  
52 212 done to ascertain whether the independent variables were actually “independent”, that  
53 213 is, are not correlated with one another and will not share variance in the outcome variable.  
54 214 Results from the multicollinearity diagnoses test (See Appendix 2) show that the variables  
55 215 were not correlated (Mean VIF=1.26; Maximum VIF=1.71; Minimum VIF=1.02). To determine

the risk factors associated with the co-existence of undernutrition, a multinomial regression model was implemented. All statistical tests were conducted at  $p < 0.05$ .

### **Ethical Approval**

This study used secondary data from the DHS Program. Since we neither interacted directly nor indirectly with the study participants, there was no need for ethical approval. Details on the ethical considerations of the DHS Program could be found at <https://dhsprogram.com/methodology/Protecting-the-Privacy-of-DHS-Survey-Respondents.cfm>.

### **Patient and public involvement**

Patients and the public were not involved in the design and conduct of this research

### **Results**

#### ***Distribution of sample characteristics***

The study included a total of 127,487 under-five children. It is found that most (30.87%) of the children were less than a year (Table 1). With regards to sex, both males and females constituted approximately half of the sample. A majority of the children (92.87%) were born to mothers aged between 20 to 49 years while only 7.13% were born to mothers aged 15 to 19 years. In terms of education, most (41.82%) of the children were born to mothers with no formal education. Only 3.10% of the children were born to a mother with a higher level of educational attainment. Further, 42.1% of the children were born in poor households while 37.21% were born in rich households. More than half (57.53%) of the children lived in a household with unimproved toilet facilities. However, most (65.63%) of the children lived in households with access to improved drinking water sources. Similarly, a majority (89.76%) of the children lived in households using clean cooking fuel (Table 1).

As shown in Appendix 2, the prevalence of co-existence of stunting, underweight, and underweight varied across countries and sub-regions, with the highest and lowest prevalence of co-existence of stunting, underweight, and wasting as Rwanda (6.17%) and South Africa (0.18%) respectively (Figure 1). In terms of sub-region, the highest prevalence of co-existence of stunting, underweight, and wasting was observed in Western Africa (3.11%) and the lowest prevalence in Southern Africa (0.88%) (Figure 2).

Significant associations between all the independent variables and co-existence of stunting, wasting, and underweight, except maternal age and age of household head, were identified (Table 2).

\*\*\*Table 1\*\*\*

\*\*\*Figure 1\*\*\*

\*\*\*Figure 2\*\*\*

\*\*\*Table 2\*\*\*

#### ***Risk factors of the co-existence of stunting, wasting and underweight***

Table 3 shows the results of the multinomial regression analysis of the risk factors of co-existence of dimensions of undernutrition (stunting, underweight, and wasting) among

257 children under five years in the SSA. Age of child, size of the child at birth, sex of the child,  
258 birth order, educational level, maternal age, ANC attendance, place of delivery, source of  
259 drinking water, sex of household head, wealth index, access to electricity and place of  
260 residence were associated with one or two dimensions of undernutrition. See Appendix 3  
261 for country-level risk of co-existence of stunting, wasting, and underweight.

262 Regarding the co-existence of the three dimensions of undernutrition (stunting,  
263 underweight, and wasting), age of the child, sex of the child, perceived birth size, maternal  
264 educational attainment, working status, antenatal visits during pregnancy, place of  
265 delivery, wealth status, access to media, and type of toilet facility were found to be  
266 significant risk factors (Table 3).

267 **\*\*\*Table 3\*\*\***

## 268 **DISCUSSION**

269 The study investigated the risk factors of the co-existence of stunting, underweight, and  
270 wasting among children under age 5 in sub-Saharan Africa using data from DHS conducted  
271 in 31 countries between 2010 and 2019. The study found that the countries with the highest  
272 and lowest prevalence of co-existence of stunting, underweight, and wasting were Benin  
273 and Gambia respectively. In terms of geographic region, the highest prevalence of co-  
274 existence of stunting, underweight, and wasting was observed in Western Africa and the  
275 lowest prevalence in Southern Africa. The disparities in the prevalence among the  
276 countries and geographical regions could be attributed to the nutritional practices and  
277 beliefs practised in the countries and geographical regions. Differences in the health  
278 policies provided by governments in the various countries could also account for the  
279 disparities noted. This finding implies that countries that have high prevalence should take  
280 critical lessons from the countries that are doing well regarding the implementation of  
281 nutritional policies and interventions (e.g., increasing dietary supplementation, increasing  
282 dietary diversity) that target the reduction of the co-existence of stunting, underweight,  
283 and wasting among children under age 5 in sub-Saharan Africa<sup>2</sup>.

284 Similar to previous studies<sup>1,3</sup>, this study found that children aged 1 year, 2 years, and 3 years  
285 were at greater risk of having co-existence of all the three forms of undernutrition  
286 compared to those aged 0. A plausible reason for this finding could be that as children  
287 grow their energy needs also increase<sup>1</sup>, increasing their risk of having all three nutritional  
288 conditions. Alternatively, since these nutritional conditions may manifest after long  
289 durations of improper nutritional practices or undernutrition<sup>1,3</sup>, older children may be at  
290 higher risk of having all three nutritional conditions. The finding suggests that  
291 complementary foods given to children as they grow are inadequate. To reduce the risk of  
292 co-existence of stunting, underweight, and wasting among under 5 children, the health  
293 sectors in the various countries should invest heavily in providing adequate  
294 complementary feeding to this category of children.

295 Corroborating the findings of other studies<sup>1,3,32,33</sup>, this study also found that children who  
296 were females were less likely to have a co-existence of the three dimensions of  
297 undernutrition compared to their male counterparts. An acceptable explanation for this  
298 finding could be the biological variations in morbidity between males and females at that  
299 young age<sup>3</sup>. It is also possible that since male children have higher birth weight compared  
300 to females, they require more energy<sup>1,34</sup>, which increases the risk of males having all three



1  
2  
3 301 nutritional conditions. Moreover, male children are perceived to be hungrier than females,  
4 302 therefore breastfeeding alone could be insufficient or inadequate<sup>3,35</sup>, increasing their  
5 303 susceptibility to having the three nutritional conditions. The finding suggests that male  
6 304 children should be given critical attention in the development and implementation of  
7 305 nutritional programs (e.g., dietary supplementation) to mitigate the co-existence of  
8 306 stunting, underweight, and wasting among these male children under 5 years.

11 307 The study found that the risk of co-existence of the three dimensions of undernutrition  
12 308 was higher among children with the average size at birth and small size at birth compared  
13 309 to children with large size at birth. It has been proven that undernutrition in children is  
14 310 partly influenced by maternal nutrition practices. Hence, mothers' appropriate nutritional  
15 311 behaviours during the prenatal and postnatal periods are key to improving child growth.  
16 312 Conversely, maternal undernutrition causes low maternal BMI, which in turn affects the  
17 313 foetus to poor development often associated with a small birth size and low birth  
18 314 weight<sup>1,3,21,36</sup>. This finding indicates that mothers of children under 5 should continuously  
19 315 be educated on the best nutritional practices such as exclusive breastfeeding,  
20 316 complementary feeding, and dietary supplementation. These strategies will help  
21 317 ameliorate the risk of acquiring health conditions associated with undernutrition among  
22 318 children under 5.

26 319 The risk of co-existence of the three dimensions was higher among children whose  
27 320 mothers had no education and primary education compared to those whose mothers had  
28 321 higher education. Mothers who have attained higher education are better informed about  
29 322 improved childcare practices<sup>37</sup>, are more empowered to make health decisions<sup>38</sup>, practice  
30 323 good personal hygiene<sup>38</sup>, are more likely to use the health facility<sup>39</sup>, proper feeding  
31 324 practices<sup>36</sup> and childcare in times of illness<sup>36,40</sup>. This finding suggests that mothers with no  
32 325 formal or little education are neglected in nutritional programs that help to eliminate  
33 326 stunting, underweight, and wasting. Hence, they should be given the needed  
34 327 consideration to deal with this persistent health issue.

38 328 This study also found that the risk of co-existence of the three dimensions was higher  
39 329 among children whose mothers were not working compared to those whose mothers  
40 330 were working. Women's employment status indicates their ability to afford proper  
41 331 nutritional products and health care services<sup>36,40</sup>. Therefore, if mothers are not employed,  
42 332 the children become highly susceptible or vulnerable because mothers are unlikely to meet  
43 333 their nutritional needs or requirements. Mothers with children under 5 with such  
44 334 disadvantaged backgrounds should be given subsidies on children's nutritional products  
45 335 and perhaps, free access to health care services by governmental and non-governmental  
46 336 organizations. This step will be significant in reducing the risks of the co-existence of  
47 337 stunting, underweight, and wasting among children under 5 years.

51 338 The risk of co-existence of the three dimensions was higher among children whose  
52 339 mothers had no antenatal visits during pregnancy compared to those whose mothers had  
53 340 antenatal visits during pregnancy. Specifically, mothers who attend antenatal services are  
54 341 usually educated on the best practices of nutrition and general healthcare, which hitherto  
55 342 would not be known by these mothers<sup>38</sup>. Therefore, mothers who did not have antenatal  
56 343 visits may lack some knowledge about proper nutritional practices, increasing their  
57 344 children's risk of having these undernutrition-related challenges. Regular antenatal visits  
58 345 could reduce children's risk of stunting, being underweight, and wasting, therefore,

346 mothers should continuously be encouraged to go for antenatal care services in their  
347 countries.

348 Children who were delivered at home compared to children who were delivered at a health  
349 facility were found to have a higher risk of co-existence of the three dimensions. Since  
350 mothers who deliver at home do not receive any expert nutritional advice from a qualified  
351 health practitioner<sup>37</sup>, the children of such mothers are at higher risk of having these  
352 conditions because of poor and/ or inadequate dietary practices. This finding shows that  
353 facility delivery may help reduce the risk of co-existence of stunting, underweight, and  
354 wasting among children under 5. Therefore, mothers should regularly be educated on the  
355 need to opt for facility delivery because of its positive implications on children's growth.

356 The risk of co-existence of the three dimensions was higher among children whose  
357 mothers were poor and had middle wealth status compared to those whose mothers were  
358 rich. Usually, mothers who have an average income may lack the financial capacity to feed  
359 themselves and their children properly and adequately<sup>3,17,36</sup>, increasing the children's risk  
360 of being stunted, underweight or wasted. Likewise, mothers from poor and middle wealth  
361 quintiles may not have access to quality nutritional products and health care systems<sup>36,40</sup>,  
362 making their children more susceptible to having all three nutritional conditions. This  
363 finding implies that women from poor economic backgrounds should be assisted with  
364 nutritional products and services to facilitate the reduction in the risks of the co-existence  
365 of stunting, underweight, and wasting among children under 5.

366 The risk of co-existence of the three dimensions was higher among children whose  
367 mothers had no access to media compared to those whose mothers had access to media.  
368 Since many people are educated about proper nutritional practices through the mass  
369 media<sup>10,11</sup>, mothers who have no access to the media may lack certain important nutritional  
370 information they need. This information gap could increase children's risk of having all  
371 three nutritional conditions through improper dietary practices from their mothers. For  
372 instance, mothers' access to appropriate information from the media would help them  
373 decide on which proper diets or food commodities are readily available on market for their  
374 children. More pragmatic ways of reaching mothers who have no access to media are  
375 encouraged. Regular outreach or sensitization programs to target women without access  
376 to media for example could help in reducing the risks of the co-existence of stunting,  
377 underweight, and wasting among children under 5 years.

378 Children whose mothers had unimproved toilet facilities were found to have a higher risk  
379 of co-existence of the three dimensions of child undernutrition compared to those whose  
380 mothers had improved toilet facilities. Insanitary or unhygienic toilet conditions may  
381 increase mother-child-environment interactions that may result in increased exposure to  
382 childhood diseases and other opportunistic infections (e.g., diarrhoeal episodes, fever)  
383 either through consumption of contaminated foods, drinking water or poor  
384 environmental sanitation<sup>21</sup>. These conditions have been shown to cause growth  
385 retardation in children. Government and non-governmental organizations should support  
386 the provision of improved household toilet facilities for poorer communities to help  
387 minimize the risks of the co-existence of child undernutrition indicators.

388 Children from Burkina Faso, Burundi, Chad, Nigeria, and Rwanda had a higher risk of having  
389 the co-existence of the three dimensions compared to those from Angola. On the other

1  
2  
3 390 hand, countries such as Benin, Cameroon, Congo, Gabon, Ghana, Guinea, Kenya, Lesotho,  
4 391 Malawi, Senegal, Zambia, Uganda, Tanzania, Sierra Leone, Zimbabwe, and South Africa  
5 392 had a lower risk among their children having co-existence of the three undernutrition  
6 393 dimensions. The sub-regional and country-specific variations in socio-economic, agro-  
7 394 ecological and geographical characteristics may strongly influence the nutritional status of  
8 395 children because of inadequate food supplies, limited access to arable land for agriculture,  
9 396 unfavourable climatic conditions (e.g., desertification), rapid population growth, and  
10 397 increasing cost of living may determine food access, availability and production in studied  
11 398 countries in SSA<sup>41,42</sup>. Governmental priorities should intensify efforts to minimize the risk  
12 399 of co-existence of stunting, underweight, and wasting among children under age 5 with  
13 400 sound socio-economic and sustainable human capital development.

### 17 401 **Strength and limitations**

19 402 The use of relative large nationally representative data of under-five children from 31 SSA  
20 403 countries is the main strength of the study. We also employed rigorous statistical  
21 404 analytical techniques to analyse the data. A broad range of potential risk factors a various  
22 405 levels were considered in our analysis. Despite these, the DHS employs cross-sectional  
23 406 designs which restrict causality on the noted outcomes. Self-reported variables used are,  
24 407 therefore, susceptible to biases from recall and other social desirability issues. The surveys  
25 408 were also conducted in different years.

28 409

### 30 410 **Conclusions and implications**

32 411 The study investigated the risk factors of the co-existence of stunting, underweight, and  
33 412 wasting among children under age 5 in sub-Saharan Africa using data from DHS conducted  
34 413 in 31 countries between 2010 and 2019. The study found that the prevalence of co-  
35 414 existence of stunting, underweight, and wasting ranged from 0.58 % in the Gambia to  
36 415 12.14% in Benin. The study also found that the prevalence of co-existence of stunting,  
37 416 underweight, and wasting was high in Western Africa (41.78%) but low in Southern Africa  
38 417 (5.3%). The significant findings show that the disadvantaged have more risks of the co-  
39 418 existence of stunting, underweight, and wasting among under 5 children in selected SSA  
40 419 countries. These findings demonstrate the urgent need for consideration of the co-  
41 420 existence of stunting, wasting and underweight among under-five children in policy design  
42 421 and programming of interventions to eradicate child malnutrition in SSA. In the short-term,  
43 422 national-level policies and interventions needs to be well-tailored considering the  
44 423 compositional characteristics including child's age, sex, birth size; maternal education,  
45 424 working status, place of delivery, antenatal visit; and household's wealth status, access to  
46 425 media and improved toilet facility are required. For instance, such programs could be  
47 426 geared towards improving females' access to education, reducing unemployment,  
48 427 expanding access to the media and using it to promote education on the need for  
49 428 antenatal care. In the long-term, regional policies and coordinated interventions among  
50 429 governments of SSA countries need to be designed to address the disparate prevalence  
51 430 of the co-existence of stunting, wasting and underweight in under-five children across the  
52 431 four geographic regions. The implementation of these at the local level should consider  
53 432 rural-urban differences in the prevalence of the condition and the risk factors elicited.  
54 433

434 **Acknowledgements:** The authors thank the MEASURE DHS project for their support and  
435 free access to the original data

436 **Contributors:** IA and BOA developed the study concept. IA performed the data analysis.  
437 AS, ED, JBF, JEH, RGA, BA, CA and BOA drafted and revised the manuscript critically for its  
438 intellectual content. All authors read and approved the final manuscript. AS had the final  
439 responsibility to submit the manuscript.

441 **Funding:** This research received no specific grant from any funding agency in the public,  
442 commercial or not-for-profit sectors

443 **Competing interests:** None

445 **Patient consent for publication:** No consent to publish was needed for this study  
446 as we did not use any details, images or videos related to individual participants. In  
447 addition, the data used are available in the public domain.

#### 449 **Ethics approval and consent to participate**

450 This study used secondary data from the DHS Program. Since we neither interacted  
451 directly nor indirectly with the study participants, there was no need for ethical approval.  
452 Details on the ethical considerations of the DHS Program could be found at  
453 [https://dhsprogram.com/methodology/Protecting-the-Privacy-of-DHS-Survey-  
454 Respondents.cfm](https://dhsprogram.com/methodology/Protecting-the-Privacy-of-DHS-Survey-Respondents.cfm).

456 **Provenance and peer review:** Not commissioned; externally peer-reviewed.

458 **Data availability statement:** Data are available in a public, open access repository.

#### 460 **References**

- 461 1. Amare ZY, Ahmed ME, Mehari AB. Determinants of nutritional status among  
462 children under age 5 in Ethiopia: further analysis of the 2016 Ethiopia demographic  
463 and health survey. *Global Health* 2019;15(1):1–11.
- 464 2. Anin SK, Saaka M, Fischer F, Kraemer A. Association between Infant and Young  
465 Child Feeding (IYCF) Indicators and the Nutritional Status of Children (6–23  
466 Months) in Northern Ghana. *Nutrients* 2020; 12, 2565.  
467 <https://doi.org/10.3390/nu12092565>
- 468 3. Madiba S, Chelule PK, Mokgatle MM. Attending informal preschools and daycare  
469 centers is a risk factor for underweight, stunting and wasting in children under the  
470 age of five years in underprivileged communities in South Africa. *International  
471 Journal of Environmental Research and Public Health* 2019; 16(14), 2589.
- 472 4. Yalew BM, Amsalu F, Bikes D. Prevalence and factors associated with stunting,  
473 underweight and wasting: a community based cross sectional study among  
474 children age 6-59 months at Lalibela Town, Northern Ethiopia. *J Nutr Disorders Ther*  
475 2014; 4(147), 2161-0509.
- 476 5. WHO. Nutrition Landscape Information System (NLIS) Country Profile Indicators:  
477 Interpretation Guide; World Health Organization: Geneva, Switzerland, 2010.

- 1  
2  
3 478 6. Akombi BJ, Agho KE, Hall JJ, Wali N, Renzaho A, Merom D. Stunting, wasting and  
4 479 underweight in sub-Saharan Africa: a systematic review. *International Journal of*  
5 480 *Environmental Research and Public Health* 2017; 14(8), 863.
- 7 481 7. WHO. Global nutrition targets 2025: policy brief series (WHO/NMH/NHD/14.2).  
8 482 Geneva: World Health Organization; 2014.  
9 483 [https://apps.who.int/iris/bitstream/handle/10665/149018/WHO\\_NMH\\_NHD\\_14.2\\_e](https://apps.who.int/iris/bitstream/handle/10665/149018/WHO_NMH_NHD_14.2_eng.pdf)  
10 484 [ng.pdf](https://apps.who.int/iris/bitstream/handle/10665/149018/WHO_NMH_NHD_14.2_eng.pdf)
- 12 485 8. Black RE, Victora CG, Walker SP, Bhutta ZA, Christian P, De Onis M, Ezzati M,  
13 486 Grantham-McGregor S, Katz J, Martorell R, Uauy R, Maternal and Child Nutrition  
14 487 Study Group. Maternal and child undernutrition and overweight in low-income and  
15 488 middle-income countries. *The lancet* 2013; 382(9890), 427-451.
- 17 489 9. World Health Organization. Levels and trends in child malnutrition: key findings of  
18 490 the 2019 edition (No. WHO/NMH/NHD/19.20). World Health Organization. 2019.
- 19 491 10. De Onis M, Onyango A, Borghi E, Siyam A, Blössner M, Lutter C. Worldwide  
20 492 implementation of the WHO child growth standards. *Public Health Nutrition*  
21 493 2012; 15(9), 1603-1610.
- 23 494 11. De Onis M, Blössner M, Borghi E. Prevalence and trends of stunting among pre-  
24 495 school children, 1990–2020. *Public Health Nutrition* 2012; 15(1), 142-148.
- 25 496 12. World Health Organization. Community-based management of severe acute  
26 497 malnutrition: a joint statement by the World Health Organization, the World Food  
27 498 Programme, the United Nations System Standing Committee on Nutrition and the  
29 499 United Nations Children's Fund. 2007.
- 30 500 13. UNICEF. Levels and trends in child malnutrition, United Nations Children's fund  
31 501 (UNICEF), World Health Organization, International Bank for Reconstruction and  
32 502 Development/The World Bank. Levels and trends in child malnutrition: key findings  
33 503 of the 2019 edition of the joint child malnutrition estimates. Geneva: World Health  
34 504 Organization; 2019 Licence: CC BY-NC-SA 3.0 IGO; 2019.
- 36 505 14. Central Statistical Agency (CSA)[Ethiopia] and ICF. Ethiopia demographic and  
37 506 health survey, Addis Ababa, Ethiopia and Calverton, Maryland, USA. 2016.
- 39 507 15. Yaya S, Uthman OA, Ekholuenetale M, Bishwajit G, Adjiwanou V. Effects of birth  
40 508 spacing on adverse childhood health outcomes: evidence from 34 countries in sub-  
41 509 Saharan Africa. *J Matern & Neonatal Med* 2020;33(20):3501–8.
- 42 510 16. Armah FA, Ekumah B, Yawson DO, Odoi JO, Afitiri A, Nyieku FE, et al. Predictive  
43 511 Probabilities of Access to Clean Cooking: Evidence from the Demographic and  
44 512 Health Surveys in 31 Countries in Sub-Saharan Africa. 2019;12(3):320–2.
- 46 513 17. Mamabolo RL, Alberts M, Steyn NP, Delemarre-van de Waal HA, Levitt NS.  
47 514 Prevalence and determinants of stunting and overweight in 3-year-old black South  
48 515 African children residing in the Central Region of Limpopo Province, South  
49 516 Africa. *Public Health Nutrition* 2005; 8(5), 501-508.
- 51 517 18. Novignon J, Aboagye E, Agyemang OS, Aryeetey G. Socioeconomic-related  
52 518 inequalities in child malnutrition: evidence from the Ghana multiple indicator  
53 519 cluster survey. *Health Economics Review* 2015; 5(1), 1-11.
- 54 520 19. Khara T, Mwangome M, Ngari M, Dolan C. Children concurrently wasted and  
55 521 stunted: A meta-analysis of prevalence data of children 6–59 months from 84  
56 522 countries. *Maternal & child nutrition*. 2018 Apr;14(2):e12516.

- 1  
2  
3 523 20. Boah M, Azupogo F, Amporfro DA, Abada LA. The epidemiology of undernutrition  
4 524 and its determinants in children under five years in Ghana. *Plos one*. 2019 Jul  
5 525 31;14(7):e0219665.  
6  
7 526 21. Khan RE, Raza MA. Determinants of malnutrition in Indian children: new evidence  
8 527 from IDHS through CIAF. *Quality & Quantity*. 2016 Jan 1;50(1):299-316.  
9  
10 528 22. Angood C, Khara T, Dolan C, Berkley JA, WaSt Technical Interest Group. Research  
11 529 priorities on the relationship between wasting and stunting. *PloS one*. 2016 May  
12 530 9;11(5):e0153221.  
13  
14 531 23. Corsi DJ, Neuman M, Finlay JE, Subramanian SV. Demographic and health surveys:  
15 532 a profile. *International Journal of Epidemiology* 2012; 41(6), 1602-1613.  
16  
17 533 24. Aliaga A, Ruilin R. Cluster optimal sample size for demographic and health surveys.  
18 534 In 7th International Conference on Teaching Statistics–ICOTS (Vol. 7, pp. 2-7). 2006.  
19  
20 535 [dataset] 25. DHS. DHS data source [https://dhsprogram.com/data/available-](https://dhsprogram.com/data/available-datasets.cfm)  
21 536 [datasets.cfm](https://dhsprogram.com/data/available-datasets.cfm)  
22  
23 537 26. Von Elm E, Altman DG, Egger M, Pocock SJ, Gøtzsche PC, Vandenbroucke JP, Strobe  
24 538 Initiative. The Strengthening the Reporting of Observational Studies in  
25 539 Epidemiology (STROBE) Statement: guidelines for reporting observational  
26 540 studies. *International journal of surgery*. 2014; 12(12), 1495-1499.  
27  
28 541 27. Collins J, Ward BM, Snow P, Kippen S, Judd F. Compositional, Contextual, and  
29 542 Collective Community Factors in Mental Health and Well-Being in Australian Rural  
30 543 Communities. *Qualitative Health Research* 2017; 27(5), 677–687.  
31 544 <https://doi.org/10.1177/1049732315625195>  
32  
33 545 28. Pol LG, Thomas RK. The demography of health and health care. Springer Science &  
34 546 Business Media. 2001.  
35  
36 547 29. Armah FA, Ekumah B, Yawson DO, Odoi JO, Afitiri AR, Nyieku F.E. Access to  
37 548 improved water and sanitation in sub-Saharan Africa in a quarter century. *Heliyon*  
38 549 2018; 4(11), e00931. <https://doi.org/10.1016/j.heliyon.2018.e00931>  
39  
40 550 30. Ross CE, Mirowsky J. Neighborhood socioeconomic status and health: context or  
41 551 composition? *City & Community* 2008; 7(2), 163–179.  
42  
43 552 31. Amegah AK, Boachie J, Näyhä S, Jaakkola JJK. Association of biomass fuel use with  
44 553 reduced body weight of adult Ghanaian women. *J Expo Sci Environ Epidemiol* 2019;1.  
45  
46 554 32. Alemayehu M, Tinsae F, Hailelassie K, Seid O, Gebregziabher G, Yebyo H.  
47 555 Undernutrition status and associated factors in under-5 children, in Tigray,  
48 556 Northern Ethiopia. *Nutrition* 2015; 31(7-8), 964-970.  
49  
50 557 33. Mya KS, Kyaw AT, Tun T. Feeding practices and nutritional status of children age 6-  
51 558 23 months in Myanmar: A secondary analysis of the 2015-16 Demographic and  
52 559 Health Survey. *PloS one* 2019; 14(1), e0209044.  
53  
54 560 34. Bork KA, Diallo A. Boys are more stunted than girls from early infancy to 3 years of  
55 561 age in rural Senegal. *The Journal of Nutrition* 2017; 147(5), 940-947.  
56  
57 562 35. Tumilowicz A, Habicht JP, Pelto G, Pelletier DL. Gender perceptions predict sex  
58 563 differences in growth patterns of indigenous Guatemalan infants and young  
59 564 children. *The American Journal of Clinical Nutrition* 2015; 102(5), 1249-1258.  
60  
61 565 36. Mukabutera A, Thomson DR, Hedt-Gauthier BL, Basinga P, Nyirazinyoye L, Murray  
62 566 M. Risk factors associated with underweight status in children under five: an

- 1  
2  
3 567 analysis of the 2010 Rwanda Demographic Health Survey (RDHS). *BMC Nutrition*  
4 568 2016; 2(1), 1-12.  
5  
6 569 37. Oyekale AS. Factors explaining acute malnutrition among under-five children in  
7 570 Sub-Saharan Africa (SSA). *Life Sci J* 2012; 9, 2101-7.  
8 571 38. Keats A. Women's schooling, fertility, and child health outcomes: Evidence from  
9 572 Uganda's free primary education program. *Journal of Development Economics*  
10 573 2018; 135, 142-159.  
11  
12 574 39. Sunguya BF, Poudel KC, Mlunde LB, Urassa DP, Yasuoka J, Jimba M. Poor nutrition  
13 575 status and associated feeding practices among HIV-positive children in a food  
14 576 secure region in Tanzania: a call for tailored nutrition training. *PloS one* 2014; 9(5),  
15 577 e98308.  
16  
17 578 40. Iannotti LL, Dulience SJL, Green J, Joseph S, François J, Antenor ML, ... Nickerson  
18 579 NM. Linear growth increased in young children in an urban slum of Haiti: a  
19 580 randomized controlled trial of a lipid-based nutrient supplement. *The American*  
20 581 *Journal of Clinical Nutrition* 2014; 99(1), 198-208.  
21  
22 582 41. Lopriore C, Muehlhoff E. Food security and nutrition trends in West Africa—  
23 583 Challenges and the way forward. In Proceedings of the 2nd International Workshop  
24 584 on Food-based Approaches for a Healthy Nutrition, Ouagadougou, Burkina. 2003;  
25 585 23–28.  
26  
27 586 42. Salami A, Kamara AB, Brixiova Z. Smallholder Agriculture in East Africa: Trends,  
28 587 Constraints and Opportunities; African Development Bank: Tunis, Tunisia, 2010.

29 588

30  
31 589 **Figures**32  
33 590 **Figure 1:** Percentage distribution of co-existence of stunting, underweight, and  
34 591 wasting (SUW) in children from the 31 study countries in SSA35  
36 592 **Figure 2:** Percentage distribution of co-existence of stunting, underweight, and  
37 593 wasting (SUW) in children by regions of SSA38  
39 59440  
41 59542  
43 59644  
45 59746  
47 59848  
49 59950  
51 60052  
53 60154  
55 60256  
57 60358  
59 60460  
60 605

606

607 Tables

608 **Table 1: Distribution of the relevant variables and characteristics of under-five children in SSA**

609

| Variable                             | %     | Variable                 | %     |
|--------------------------------------|-------|--------------------------|-------|
| Age of child                         |       | Urbanicity               |       |
| 0                                    | 30.87 | Urban                    | 33.21 |
| 1                                    | 28.42 | Rural                    | 66.79 |
| 2                                    | 20.22 | Place of delivery        |       |
| 3                                    | 12.40 | Home                     | 31.33 |
| 4                                    | 8.09  | Health facility          | 67.51 |
| Sex of child                         |       | Other                    | 1.16  |
| Male                                 | 50.47 | Wealth status            |       |
| Female                               | 49.53 | Poor                     | 42.41 |
| Birth order                          |       | Middle                   | 20.28 |
| 1                                    | 19.52 | Rich                     | 37.31 |
| 2 to 4                               | 48.09 | Age of household head    |       |
| 5 and above                          | 32.39 | Young-adults             | 43.08 |
| Perceived size at birth              |       | Middle-aged adults       | 43.76 |
| Large                                | 33.71 | Old-aged adults          | 13.16 |
| Average                              | 49.74 | Sex of household head    |       |
| Small                                | 16.54 | Male                     | 79.77 |
| Mother's characteristics             |       | Female                   | 20.23 |
| Maternal age                         |       | Access to electricity    |       |
| 15-19                                | 7.13  | No                       | 69.20 |
| 20-49                                | 92.87 | Yes                      | 30.80 |
| Educational attainment               |       | Type of toilet facility  |       |
| No education                         | 41.82 | Improved                 | 42.47 |
| Primary                              | 31.26 | Unimproved               | 57.53 |
| Secondary                            | 23.82 | Source of drinking water |       |
| Higher                               | 3.10  | Improved                 | 65.63 |
| Working status                       |       | Unimproved               | 34.37 |
| No                                   | 35.49 | Type of cooking fuel     |       |
| Yes                                  | 64.51 | Clean                    | 89.76 |
| Antenatal visits during pregnancy    |       | Unclean                  | 10.24 |
| No                                   | 10.76 | Geographic region        |       |
| Yes                                  | 89.24 | Western                  | 41.78 |
| Postnatal check within 2 months      |       | Eastern                  | 32.84 |
| No                                   | 58.49 | Central                  | 20.08 |
| Yes                                  | 41.51 | South Africa             | 5.30  |
| Access to media (tv/radio/newspaper) |       |                          |       |
| Yes                                  | 35.33 |                          |       |
| No                                   | 64.67 |                          |       |

(N=127,487)

610



611

612

**Table 2: Prevalence and association of the co-existence of stunting, underweight and wasting with independent variables**

| Variable                                    | Co-existed Weighted % (95% CI) | Variable                                  | Co-existed Weighted % (95% CI) | Variable                    | Co-existed Weighted % (95% CI) |
|---------------------------------------------|--------------------------------|-------------------------------------------|--------------------------------|-----------------------------|--------------------------------|
| <b>Age of child (p&lt;0.001)</b>            |                                | <b>Place of delivery (p&lt;0.001)</b>     |                                | <b>Country (p&lt;0.001)</b> |                                |
| <1                                          | 1.75 (1.6-1.9)                 | Home                                      | 4.36 (4.2-4.6)                 | Angola                      | 2.46 (2.1-2.8)                 |
| 1                                           | 4.44 (4.2-4.7)                 | Health facility                           | 1.96 (1.9-2.1)                 | Benin                       | 2.04 (1.8-2.2)                 |
| 2                                           | 3.01 (2.8-3.2)                 | Other                                     | 2.45 (1.7-3.3)                 | Burkina Faso                | 5.31 (4.9-5.8)                 |
| 3                                           | 1.62 (1.4-1.8)                 | <b>Wealth status (p&lt;0.001)</b>         |                                | Burundi                     | 3.76 (3.2-4.4)                 |
| 4                                           | 1.33 (1.1-1.6)                 | Poor                                      | 3.46 (3.3-3.6)                 | Cameroon                    | 1.27 (0.9-1.7)                 |
| <b>Sex of child (p&lt;0.001)</b>            |                                | Middle                                    | 2.74 (2.5-2.9)                 | Chad                        | 5.86 (5.2-6.5)                 |
| Male                                        | 3.43 (3.3-3.6)                 | Rich                                      | 1.86 (1.7-2.0)                 | Comoros                     | 1.98 (1.3-2.9)                 |
| Female                                      | 1.99 (1.9-2.1)                 | <b>Age of household head (p = 0.2760)</b> |                                | Congo Cote d'Ivoire         | 0.98 (0.7-1.5)                 |
| <b>Birth order (p&lt;0.001)</b>             |                                | Young-adults                              | 2.65 (2.5-2.8)                 | d'Ivoire                    | 2.28 (1.7-3.0)                 |
| 1                                           | 2.25 (2.1-2.4)                 | Middle-aged adults                        | 2.76 (2.6-2.9)                 | DR Congo                    | 2.66 (2.2-3.2)                 |
| 2 to 4                                      | 2.56 (2.4-2.7)                 | Old-aged adults                           | 2.8 (2.6-3.1)                  | Ethiopia                    | 3.64 (3.2-4.1)                 |
| 5 and above                                 | 3.23 (3.1-3.4)                 | <b>Sex of household head (p&lt;0.001)</b> |                                | Gabon                       | 0.63 (0.3-1.0)                 |
| <b>Perceived size at birth (p&lt;0.001)</b> |                                | Male                                      | 2.82 (2.7-2.9)                 | The Gambia                  | 3.61 (2.4-5.2)                 |
| Large                                       | 1.78 (1.7-1.9)                 | Female                                    | 2.33 (2.1-2.5)                 | Ghana                       | 1.37 (0.9-2.0)                 |
| Average                                     | 2.6 (2.5-2.7)                  | <b>Access to electricity (p&lt;0.001)</b> |                                | Guinea                      | 2.26 (1.7-2.9)                 |
| Small                                       | 4.98 (4.7-5.3)                 | No                                        | 3.21 (3.1-3.3)                 | Kenya                       | 0.94 (0.7-1.2)                 |

|  |                                                       |                                              |                |                                             |                 |
|--|-------------------------------------------------------|----------------------------------------------|----------------|---------------------------------------------|-----------------|
|  | <b>Maternal age (P = 0.080)</b>                       | Yes                                          | 1.61 (1.5-1.7) | Lesotho                                     | 0.86 (0.7-1.0)  |
|  |                                                       | <b>Access to media</b>                       |                |                                             |                 |
|  | 15-19                                                 |                                              | 2.78 (2.5-3.1) | Liberia                                     | 2.37 (1.7-3.1)  |
|  | 20-49                                                 | Yes                                          | 2.71 (2.6-2.8) | Malawi                                      | 1.03 (0.7-1.4)  |
|  | <b>Educational attainment (p&lt;0.001)</b>            |                                              |                |                                             |                 |
|  |                                                       | No                                           | 3.78 (3.6-4.0) | Mali                                        | 3.62 (2.5-4.1)  |
|  | No education                                          |                                              | 4.19 (4.0-4.4) | <b>Type of toilet facility (p&lt;0.001)</b> |                 |
|  | Primary                                               | Improved                                     | 2.09 (2.0-2.2) | Namibia                                     | 1.99 (1.2-3.1)  |
|  | Secondary                                             | Unimproved                                   | 1.22 (1.1-1.3) | Nigeria                                     | 4.1 (3.7-4.6)   |
|  |                                                       |                                              | 3.43 (3.3-3.6) | Rwanda                                      | 6.17 (5.5-6.9)  |
|  |                                                       | <b>Source of drinking water (p&lt;0.001)</b> |                |                                             |                 |
|  | Higher                                                |                                              | 0.66 (0.4-1.0) | Senegal                                     | 2.43 (1.8-3.2)  |
|  |                                                       | Improved                                     | 2.54 (2.4-2.6) | Sierra Leone                                | 1.94 (1.4-2.5)  |
|  | <b>Working status (p&lt;0.001)</b>                    | Unimproved                                   | 3.06 (2.9-3.2) | South Africa                                | 0.18 (0.02-0.8) |
|  | No                                                    |                                              | 3.13 (3.0-3.3) | Tanzania                                    | 1.86 (2.1-3.5)  |
|  | Yes                                                   |                                              | 2.48 (2.4-2.6) | <b>Type of cooking fuel (p&lt;0.001)</b>    |                 |
|  |                                                       | Clean                                        | 0.98 (0.8-1.2) | Togo                                        | 2.72 (2.1-3.4)  |
|  | <b>Antenatal visits during pregnancy (p&lt;0.001)</b> | Unclean                                      | 2.92 (2.8-3.0) | Uganda                                      | 1.2 (0.8-1.7)   |
|  | No                                                    |                                              | 5.41 (5.0-5.8) | <b>Urbanicity (p&lt;0.001)</b>              |                 |
|  | Yes                                                   |                                              | 2.39 (2.3-2.5) | Zambia                                      | 1.22 (1.0-1.5)  |
|  | <b>Postnatal check within 2 months (p&lt;0.001)</b>   |                                              |                |                                             |                 |
|  |                                                       | Urban                                        | 1.73 (1.6-1.9) | Zimbabwe                                    | 0.78 (0.5-1.1)  |
|  | No                                                    | Rural                                        | 2.93 (2.8-3.1) | <b>Geographic region (p&lt;0.0010)</b>      |                 |
|  | Yes                                                   |                                              | 2.42 (2.3-2.6) | Western                                     | 3.11 (3.0-2.3)  |
|  |                                                       |                                              |                | Eastern                                     | 2.43 (2.3-2.6)  |
|  |                                                       |                                              |                | Central                                     | 2.87 (2.7-3.1)  |
|  |                                                       |                                              |                | South Africa                                | 0.88 (0.66-1.1) |

613

614

615

**Table 3: Multinomial regression showing risk factors of co-existence of stunting, underweight, and wasting**

| Variable                                            | Base outcome (Ref: Normal) |        |       |                                  |        |       |
|-----------------------------------------------------|----------------------------|--------|-------|----------------------------------|--------|-------|
|                                                     | Single and two dimensions  |        |       | Co-existence of three-dimensions |        |       |
|                                                     | RRR                        | 95% CI |       | RRR                              | 95% CI |       |
| <b>Age of child (Ref:0)</b>                         |                            |        |       |                                  |        |       |
| 1                                                   | 2.008***                   | 1.93   | 2.089 | 3.714***                         | 3.319  | 4.156 |
| 2                                                   | 2.624***                   | 2.514  | 2.739 | 2.827***                         | 2.48   | 3.222 |
| 3                                                   | 2.122***                   | 2.018  | 2.231 | 1.464***                         | 1.227  | 1.748 |
| 4                                                   | 1.504***                   | 1.417  | 1.597 | 1.051                            | 0.84   | 1.315 |
| <b>Sex of child (Ref: Male)</b>                     |                            |        |       |                                  |        |       |
| Female                                              | 0.752***                   | 0.731  | 0.775 | 0.468***                         | 0.429  | 0.51  |
| <b>Birth order (Ref: 1)</b>                         |                            |        |       |                                  |        |       |
| 2                                                   | 0.938**                    | 0.896  | 0.981 | 1.002                            | 0.875  | 1.146 |
| 5 and above                                         | 0.969                      | 0.92   | 1.021 | 0.995                            | 0.858  | 1.155 |
| <b>Perceived size at birth (Ref: Large)</b>         |                            |        |       |                                  |        |       |
| Average                                             | 1.32***                    | 1.276  | 1.365 | 1.756***                         | 1.574  | 1.958 |
| Small                                               | 1.931***                   | 1.846  | 2.02  | 3.818***                         | 3.383  | 4.308 |
| <b>Maternal age (Ref: 15-19)</b>                    |                            |        |       |                                  |        |       |
| 20-49                                               | 0.834***                   | 0.78   | 0.891 | 0.881                            | 0.735  | 1.056 |
| <b>Educational attainment (Ref: Higher)</b>         |                            |        |       |                                  |        |       |
| No education                                        | 2.624***                   | 2.305  | 2.987 | 3.291***                         | 1.961  | 5.522 |
| Primary                                             | 2.189***                   | 1.927  | 2.487 | 2.381***                         | 1.417  | 4.001 |
| Secondary                                           | 1.751***                   | 1.545  | 1.985 | 1.617                            | 0.971  | 2.691 |
| <b>Working status (Ref: Yes)</b>                    |                            |        |       |                                  |        |       |
| No                                                  | 1.018                      | 0.984  | 1.053 | 1.195***                         | 1.086  | 1.314 |
| <b>Antenatal visits during pregnancy (Ref: Yes)</b> |                            |        |       |                                  |        |       |
| No                                                  | 1.139***                   | 1.079  | 1.201 | 1.364***                         | 1.208  | 1.541 |
| <b>Postnatal check within 2 months (Ref: Yes)</b>   |                            |        |       |                                  |        |       |
| No                                                  | 0.98                       | 0.946  | 1.015 | 0.977                            | 0.879  | 1.086 |
| <b>Place of delivery (Ref: Health facility)</b>     |                            |        |       |                                  |        |       |

|                                                        |          |       |       |          |       |       |
|--------------------------------------------------------|----------|-------|-------|----------|-------|-------|
| Home                                                   | 1.183*** | 1.137 | 1.23  | 1.372*** | 1.232 | 1.529 |
| Other                                                  | 1.046    | 0.912 | 1.201 | 1.047    | 0.71  | 1.543 |
| <b>Wealth status (Ref: Rich)</b>                       |          |       |       |          |       |       |
| Poor                                                   | 1.297*** | 1.235 | 1.361 | 1.408*** | 1.235 | 1.605 |
| Middle                                                 | 1.195*** | 1.138 | 1.254 | 1.214**  | 1.054 | 1.397 |
| <b>Age of household head (Ref: Young-adult)</b>        |          |       |       |          |       |       |
| Middle-aged adults                                     | 0.954**  | 0.921 | 0.987 | 1.01     | 0.913 | 1.118 |
| Old-aged adults                                        | 0.974    | 0.93  | 1.021 | 1.065    | 0.936 | 1.213 |
| <b>Sex of household head (Ref: Male)</b>               |          |       |       |          |       |       |
| Female                                                 | 0.977    | 0.94  | 1.015 | 1.035    | 0.925 | 1.159 |
| <b>Access to media (tv/radio/newspaper) (Ref: Yes)</b> |          |       |       |          |       |       |
| No                                                     | 1.079*** | 1.042 | 1.117 | 1.255*** | 1.144 | 1.377 |
| <b>Access to electricity (Ref: Yes)</b>                |          |       |       |          |       |       |
| No                                                     | 1.136*** | 1.083 | 1.191 | 1.062    | 0.922 | 1.225 |
| <b>Type of toilet facility (Ref: Improved)</b>         |          |       |       |          |       |       |
| Unimproved                                             | 1.027    | 0.991 | 1.065 | 1.158**  | 1.032 | 1.300 |
| <b>Source of drinking water (Ref: Improved)</b>        |          |       |       |          |       |       |
| Unimproved                                             | 0.959**  | 0.928 | 0.99  | 0.968    | 0.885 | 1.058 |
| <b>Type of cooking fuel (Ref: Clean)</b>               |          |       |       |          |       |       |
| Unclean                                                | 1.177*** | 1.089 | 1.271 | 1.316    | 0.97  | 1.787 |
| <b>Urbanicity (Ref: Urban)</b>                         |          |       |       |          |       |       |
| Rural                                                  | 1.05**   | 1.006 | 1.095 | 0.943    | 0.832 | 1.069 |

616

617

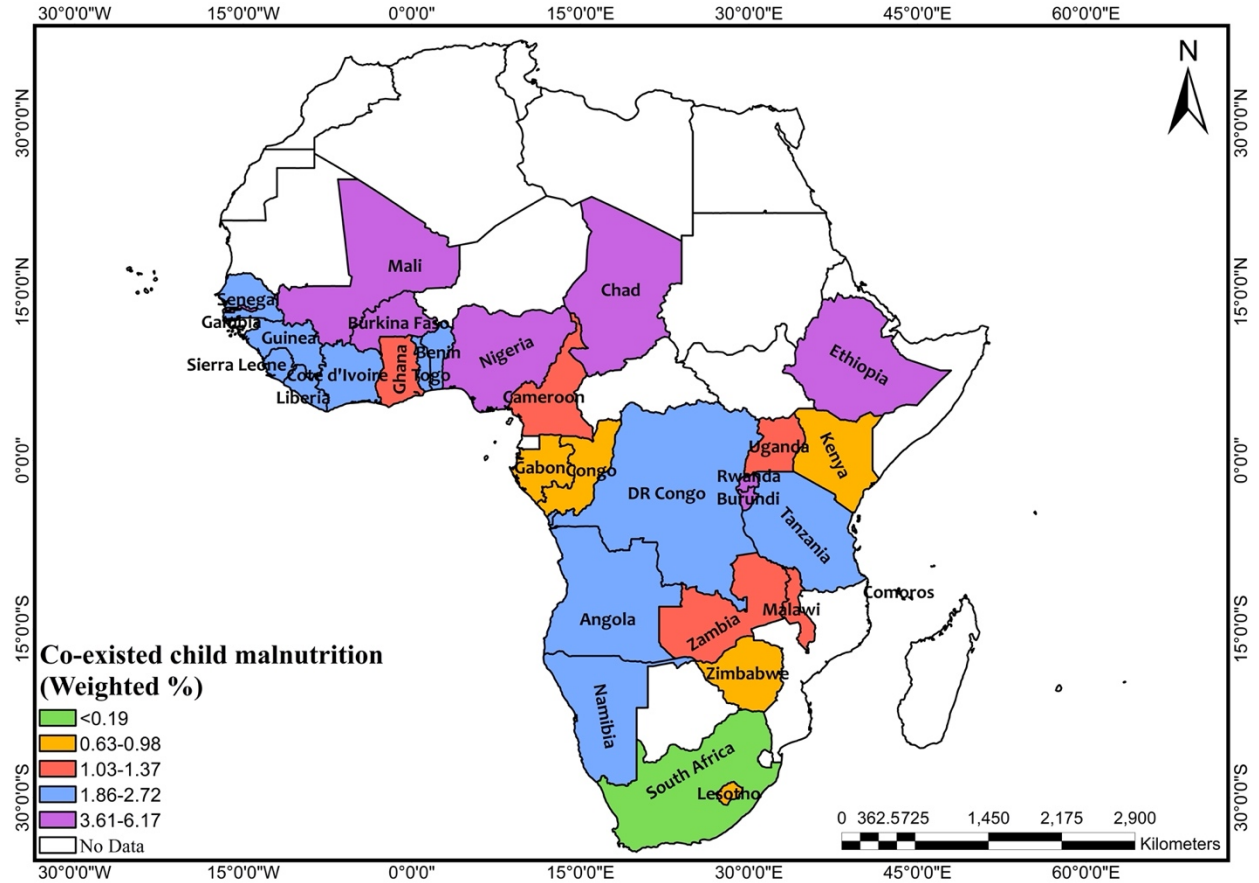

Figure 1: Percentage distribution of co-existence of stunting, underweight, and wasting (SUW) in children from the 31 study countries in SSA

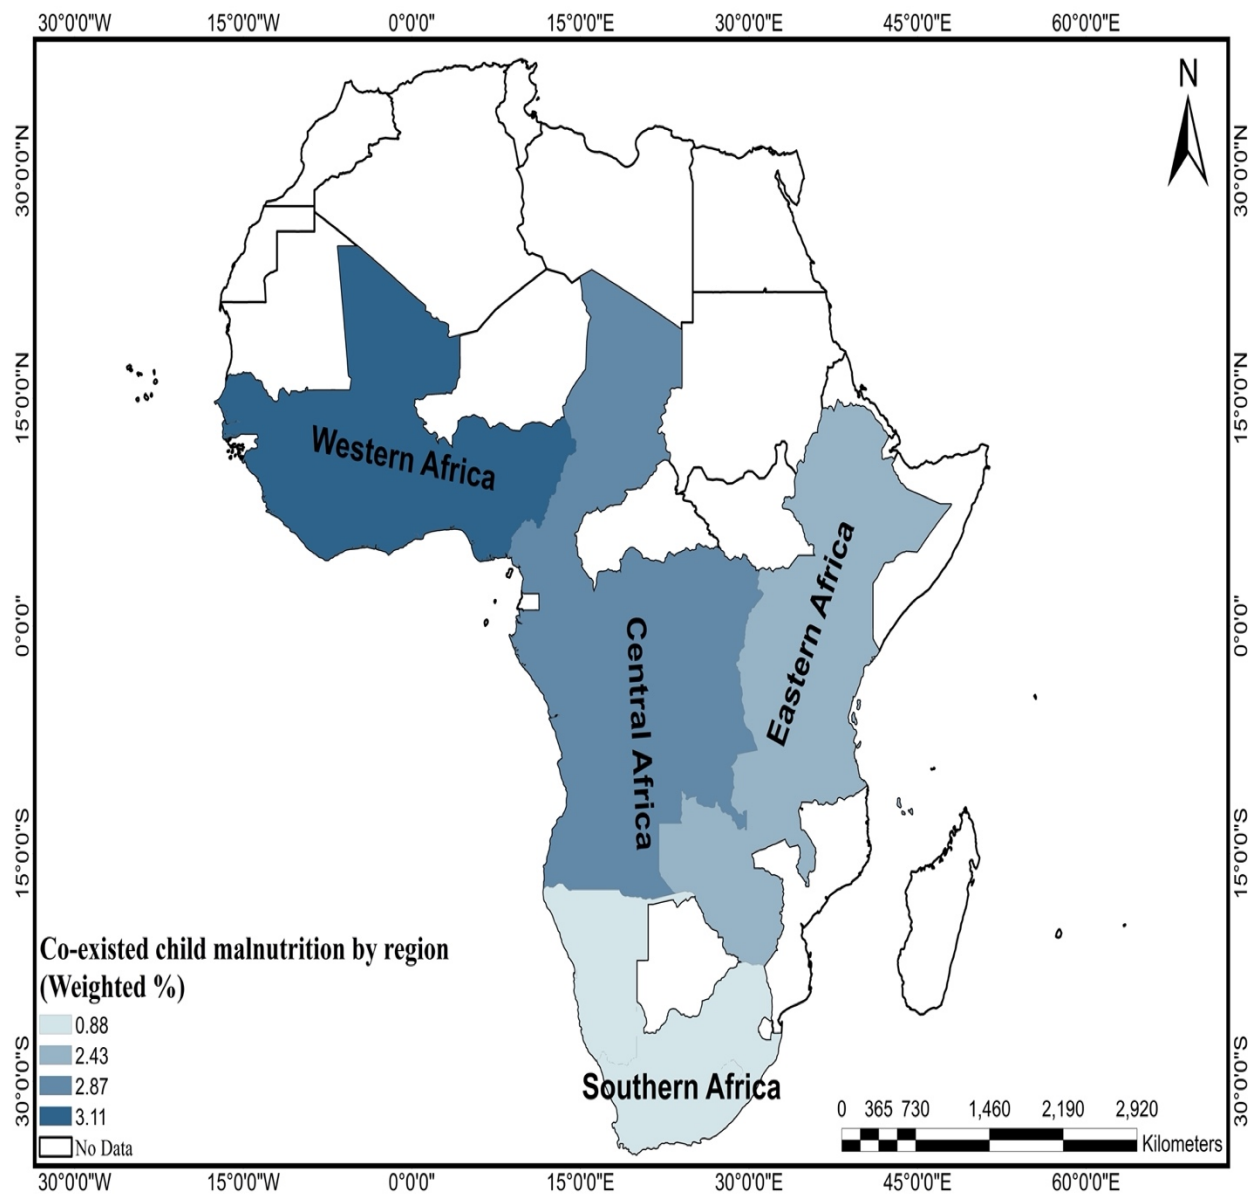

**Figure 2:** Percentage distribution of co-existence of stunting, underweight, and wasting (SUW) in children by regions of SSA

## Supplementary Tables

**Appendix 1: Distribution of sample by country**

| Country       | Survey year | n      | %     |
|---------------|-------------|--------|-------|
| Angola        | 2015-16     | 7,318  | 5.74  |
| Benin         | 2017-18     | 15,473 | 12.14 |
| Burkina Faso  | 2010        | 8,908  | 6.99  |
| Burundi       | 2016-17     | 4,172  | 3.27  |
| Cameroon      | 2018        | 2,911  | 2.28  |
| Chad          | 2014-2015   | 5,999  | 4.71  |
| Comoros       | 2012        | 1,320  | 1.03  |
| Congo         | 2013        | 2,609  | 2.05  |
| Cote d'Ivoire | 2011-12     | 2,174  | 1.71  |
| Congo DR      | 2013-14     | 4,806  | 3.77  |
| Ethiopia      | 2016        | 6,573  | 5.16  |
| Gabon         | 2012        | 1,960  | 1.54  |
| Gambia        | 2013        | 743    | 0.58  |
| Ghana         | 2014        | 1,896  | 1.49  |
| Guinea        | 2018        | 2,237  | 1.75  |
| Kenya         | 2014        | 6,066  | 4.76  |
| Lesotho       | 2014        | 1,012  | 0.79  |
| Liberia       | 2013        | 1,946  | 1.53  |
| Malawi        | 2015-16     | 4,027  | 3.16  |
| Mali          | 2018        | 5,653  | 4.43  |
| Namibia       | 2013        | 905    | 0.71  |
| Nigeria       | 2018        | 7,379  | 5.79  |
| Rwanda        | 2014-15     | 4,408  | 3.46  |
| Senegal       | 2010-11     | 1,944  | 1.52  |
| Sierra Leone  | 2019        | 2,689  | 2.11  |
| South Africa  | 2016        | 855    | 0.67  |
| Tanzania      | 2015-16     | 6,061  | 4.75  |
| Togo          | 2013-14     | 2,220  | 1.74  |
| Uganda        | 2016        | 2,891  | 2.27  |
| Zambia        | 2018        | 6,347  | 4.98  |
| Zimbabwe      | 2015        | 3,987  | 3.13  |

| Appendix 2: Multicollinearity diagnosis |      |          |           |           |
|-----------------------------------------|------|----------|-----------|-----------|
| Variable                                | VIF  | SQRT VIF | Tolerance | R-Squared |
| Age of child                            | 1.05 | 1.02     | 0.9547    | 0.0453    |
| Sex of child                            | 1.01 | 1        | 0.9948    | 0.0052    |
| Birth order                             | 1.36 | 1.17     | 0.7366    | 0.2634    |
| Perceived size at birth                 | 1.02 | 1.01     | 0.9798    | 0.0202    |
| Age at child birth                      | 1.22 | 1.1      | 0.8224    | 0.1776    |
| Educational attainment                  | 1.51 | 1.23     | 0.664     | 0.336     |
| Working status                          | 1.07 | 1.03     | 0.9357    | 0.0643    |
| Antenatal visits during pregnancy       | 1.25 | 1.12     | 0.7976    | 0.2024    |
| Postnatal check within 2 months         | 1.1  | 1.05     | 0.9098    | 0.0902    |
| Place of delivery                       | 1.31 | 1.15     | 0.7617    | 0.2383    |
| Wealth status                           | 1.8  | 1.34     | 0.5554    | 0.4446    |
| Age of household head                   | 1.05 | 1.02     | 0.9546    | 0.0454    |
| Sex of household head                   | 1.03 | 1.02     | 0.9702    | 0.0298    |
| Access to media (tv/radio/newspaper)    | 1.26 | 1.12     | 0.7913    | 0.2087    |
| Access to electricity                   | 1.71 | 1.31     | 0.5837    | 0.4163    |
| Type of toilet facility                 | 1.35 | 1.16     | 0.7404    | 0.2596    |
| Source of drinking water                | 1.09 | 1.04     | 0.9191    | 0.0809    |
| Type of cooking fuel                    | 1.31 | 1.14     | 0.7653    | 0.2347    |
| Urbanicity                              | 1.58 | 1.26     | 0.6319    | 0.3681    |
| Country                                 | 1.17 | 1.08     | 0.8579    | 0.1421    |
| Mean VIF                                | 1.26 |          |           |           |



## Appendix 3: Country-level risk of co-existence of stunting, wasting, and underweight

|                              | Base outcome (Ref: Normal) |        |       |                                  |        |       |
|------------------------------|----------------------------|--------|-------|----------------------------------|--------|-------|
|                              | Single and two dimensions  |        |       | Co-existence of three-dimensions |        |       |
|                              | RRR                        | 95% CI |       | RRR                              | 95% CI |       |
| <b>Country (Ref: Angola)</b> |                            |        |       |                                  |        |       |
| Benin                        | 0.651***                   | 0.598  | 0.708 | 0.625***                         | 0.489  | 0.798 |
| Burkina Faso                 | 0.952                      | 0.866  | 1.046 | 1.946***                         | 1.526  | 2.481 |
| Burundi                      | 1.580***                   | 1.424  | 1.753 | 2.049***                         | 1.545  | 2.718 |
| Cameroon                     | 0.669***                   | 0.593  | 0.756 | 0.398***                         | 0.261  | 0.609 |
| Chad                         | 0.910                      | 0.823  | 1.007 | 1.505**                          | 1.184  | 1.913 |
| Comoros                      | 0.883                      | 0.745  | 1.046 | 0.656                            | 0.378  | 1.138 |
| Congo                        | 0.674***                   | 0.580  | 0.783 | 0.472**                          | 0.279  | 0.800 |
| Cote d'Ivoire                | 0.734***                   | 0.638  | 0.844 | 0.739                            | 0.492  | 1.109 |
| DR Congo                     | 1.229***                   | 1.100  | 1.373 | 1.351                            | 0.988  | 1.847 |
| Ethiopia                     | 0.810***                   | 0.726  | 0.904 | 0.813                            | 0.604  | 1.095 |
| Gabon                        | 0.495***                   | 0.415  | 0.59  | 0.319**                          | 0.128  | 0.796 |
| Gambia                       | 0.732**                    | 0.603  | 0.889 | 1.001                            | 0.618  | 1.620 |
| Ghana                        | 0.453***                   | 0.386  | 0.531 | 0.545**                          | 0.346  | 0.857 |
| Guinea                       | 0.798***                   | 0.705  | 0.904 | 0.726                            | 0.509  | 1.036 |
| Kenya                        | 0.553***                   | 0.498  | 0.615 | 0.321***                         | 0.230  | 0.449 |
| Lesotho                      | 0.777**                    | 0.654  | 0.924 | 0.369***                         | 0.177  | 0.772 |
| Liberia                      | 0.658***                   | 0.565  | 0.768 | 0.776                            | 0.484  | 1.243 |
| Malawi                       | 0.794***                   | 0.708  | 0.889 | 0.447***                         | 0.291  | 0.687 |
| Mali                         | 0.600***                   | 0.541  | 0.664 | 1.006                            | 0.769  | 1.316 |
| Namibia                      | 0.680***                   | 0.568  | 0.815 | 0.849                            | 0.505  | 1.426 |
| Nigeria                      | 0.953                      | 0.868  | 1.046 | 1.527**                          | 1.183  | 1.972 |
| Rwanda                       | 1.059                      | 0.954  | 1.176 | 1.991***                         | 1.541  | 2.571 |
| Senegal                      | 0.660***                   | 0.572  | 0.761 | 0.643*                           | 0.434  | 0.952 |
| Sierra Leone                 | 0.641***                   | 0.567  | 0.725 | 0.656*                           | 0.447  | 0.963 |
| South Africa                 | 0.788*                     | 0.634  | 0.979 | 0.108***                         | 0.033  | 0.352 |
| Tanzania                     | 0.772***                   | 0.699  | 0.851 | 0.699**                          | 0.512  | 0.954 |
| Togo                         | 0.557***                   | 0.490  | 0.633 | 0.838                            | 0.590  | 1.190 |
| Uganda                       | 0.627***                   | 0.556  | 0.708 | 0.421***                         | 0.278  | 0.637 |
| Zambia                       | 0.904*                     | 0.818  | 0.998 | 0.519***                         | 0.366  | 0.736 |
| Zimbabwe                     | 0.693***                   | 0.620  | 0.775 | 0.344***                         | 0.214  | 0.554 |

## STROBE Statement—checklist of items that should be included in reports of observational studies

|                              | Item No. | Recommendation                                                                                                                                                                             | Page No. | Relevant text from manuscript |
|------------------------------|----------|--------------------------------------------------------------------------------------------------------------------------------------------------------------------------------------------|----------|-------------------------------|
| <b>Title and abstract</b>    | 1        | (a) Indicate the study's design with a commonly used term in the title or the abstract                                                                                                     | 1        |                               |
|                              |          | (b) Provide in the abstract an informative and balanced summary of what was done and what was found                                                                                        | 2        |                               |
| <b>Introduction</b>          |          |                                                                                                                                                                                            |          |                               |
| Background/rationale         | 2        | Explain the scientific background and rationale for the investigation being reported                                                                                                       | 4-5      |                               |
| Objectives                   | 3        | State specific objectives, including any prespecified hypotheses                                                                                                                           | 5        |                               |
| <b>Methods</b>               |          |                                                                                                                                                                                            |          |                               |
| Study design                 | 4        | Present key elements of study design early in the paper                                                                                                                                    | 5        |                               |
| Setting                      | 5        | Describe the setting, locations, and relevant dates, including periods of recruitment, exposure, follow-up, and data collection                                                            | 5        |                               |
| Participants                 | 6        | (a) <i>Cohort study</i> —Give the eligibility criteria, and the sources and methods of selection of participants. Describe methods of follow-up                                            | 5        |                               |
|                              |          | <i>Case-control study</i> —Give the eligibility criteria, and the sources and methods of case ascertainment and control selection. Give the rationale for the choice of cases and controls |          |                               |
|                              |          | <i>Cross-sectional study</i> —Give the eligibility criteria, and the sources and methods of selection of participants                                                                      |          |                               |
|                              |          | (b) <i>Cohort study</i> —For matched studies, give matching criteria and number of exposed and unexposed                                                                                   |          |                               |
|                              |          | <i>Case-control study</i> —For matched studies, give matching criteria and the number of controls per case                                                                                 |          |                               |
| Variables                    | 7        | Clearly define all outcomes, exposures, predictors, potential confounders, and effect modifiers. Give diagnostic criteria, if applicable                                                   | 6        |                               |
| Data sources/<br>measurement | 8*       | For each variable of interest, give sources of data and details of methods of assessment (measurement). Describe comparability of assessment methods if there is more than one group       | 5-6      |                               |
| Bias                         | 9        | Describe any efforts to address potential sources of bias                                                                                                                                  | 6        |                               |
| Study size                   | 10       | Explain how the study size was arrived at                                                                                                                                                  | 5        |                               |

Continued on next page

|                        |     |                                                                                                                                                                                                                                                                                                           |      |
|------------------------|-----|-----------------------------------------------------------------------------------------------------------------------------------------------------------------------------------------------------------------------------------------------------------------------------------------------------------|------|
| Quantitative variables | 11  | Explain how quantitative variables were handled in the analyses. If applicable, describe which groupings were chosen and why                                                                                                                                                                              | 6    |
| Statistical methods    | 12  | (a) Describe all statistical methods, including those used to control for confounding                                                                                                                                                                                                                     | 6    |
|                        |     | (b) Describe any methods used to examine subgroups and interactions                                                                                                                                                                                                                                       | N/A  |
|                        |     | (c) Explain how missing data were addressed                                                                                                                                                                                                                                                               | 7    |
|                        |     | (d) <i>Cohort study</i> —If applicable, explain how loss to follow-up was addressed<br><i>Case-control study</i> —If applicable, explain how matching of cases and controls was addressed<br><i>Cross-sectional study</i> —If applicable, describe analytical methods taking account of sampling strategy |      |
|                        |     | (e) Describe any sensitivity analyses                                                                                                                                                                                                                                                                     | N/A  |
| <b>Results</b>         |     |                                                                                                                                                                                                                                                                                                           |      |
| Participants           | 13* | (a) Report numbers of individuals at each stage of study—eg numbers potentially eligible, examined for eligibility, confirmed eligible, included in the study, completing follow-up, and analysed                                                                                                         | 8    |
|                        |     | (b) Give reasons for non-participation at each stage                                                                                                                                                                                                                                                      | N/A  |
|                        |     | (c) Consider use of a flow diagram                                                                                                                                                                                                                                                                        | N/A  |
| Descriptive data       | 14* | (a) Give characteristics of study participants (eg demographic, clinical, social) and information on exposures and potential confounders                                                                                                                                                                  | 8    |
|                        |     | (b) Indicate number of participants with missing data for each variable of interest                                                                                                                                                                                                                       | N/A  |
|                        |     | (c) <i>Cohort study</i> —Summarise follow-up time (eg, average and total amount)                                                                                                                                                                                                                          |      |
| Outcome data           | 15* | <i>Cohort study</i> —Report numbers of outcome events or summary measures over time                                                                                                                                                                                                                       | N/A  |
|                        |     | <i>Case-control study</i> —Report numbers in each exposure category, or summary measures of exposure                                                                                                                                                                                                      |      |
|                        |     | <i>Cross-sectional study</i> —Report numbers of outcome events or summary measures                                                                                                                                                                                                                        |      |
| Main results           | 16  | (a) Give unadjusted estimates and, if applicable, confounder-adjusted estimates and their precision (eg, 95% confidence interval). Make clear which confounders were adjusted for and why they were included                                                                                              | 6-10 |
|                        |     | (b) Report category boundaries when continuous variables were categorized                                                                                                                                                                                                                                 | 6-10 |
|                        |     | (c) If relevant, consider translating estimates of relative risk into absolute risk for a meaningful time period                                                                                                                                                                                          | N/A  |

Continued on next page

|                          |    |                                                                                                                                                                            |     |
|--------------------------|----|----------------------------------------------------------------------------------------------------------------------------------------------------------------------------|-----|
| Other analyses           | 17 | Report other analyses done—eg analyses of subgroups and interactions, and sensitivity analyses                                                                             | N/A |
| <b>Discussion</b>        |    |                                                                                                                                                                            |     |
| Key results              | 18 | Summarise key results with reference to study objectives                                                                                                                   | 8   |
| Limitations              | 19 | Discuss limitations of the study, taking into account sources of potential bias or imprecision. Discuss both direction and magnitude of any potential bias                 | 11  |
| Interpretation           | 20 | Give a cautious overall interpretation of results considering objectives, limitations, multiplicity of analyses, results from similar studies, and other relevant evidence | 11  |
| Generalisability         | 21 | Discuss the generalisability (external validity) of the study results                                                                                                      | 11  |
| <b>Other information</b> |    |                                                                                                                                                                            |     |
| Funding                  | 22 | Give the source of funding and the role of the funders for the present study and, if applicable, for the original study on which the present article is based              | 12  |

\*Give information separately for cases and controls in case-control studies and, if applicable, for exposed and unexposed groups in cohort and cross-sectional studies.

**Note:** An Explanation and Elaboration article discusses each checklist item and gives methodological background and published examples of transparent reporting. The STROBE checklist is best used in conjunction with this article (freely available on the Web sites of PLoS Medicine at <http://www.plosmedicine.org/>, Annals of Internal Medicine at <http://www.annals.org/>, and Epidemiology at <http://www.epidem.com/>). Information on the STROBE Initiative is available at [www.strobe-statement.org](http://www.strobe-statement.org).
