# Supplementary material for: Risk factors associated with the coexistence of stunting, underweight, and wasting in children under 5 from 31 sub-Saharan African countries
Source: PubMed Central journal article supplement — BMJ Open. 2021 Dec 20;11(12):e052267. doi: 10.1136/bmjopen-2021-052267 (PMC8689177; doi:10.1136/bmjopen-2021-052267), 2021-12-20
Supplement: bmjopen-2021-052267supp001.pdf [file bmjopen-2021-052267supp001.pdf]

## Supplementary Tables

**Appendix 1: Distribution of sample by country**

| Country       | Survey year | n      | %     |
|---------------|-------------|--------|-------|
| Angola        | 2015-16     | 7,318  | 5.74  |
| Benin         | 2017-18     | 15,473 | 12.14 |
| Burkina Faso  | 2010        | 8,908  | 6.99  |
| Burundi       | 2016-17     | 4,172  | 3.27  |
| Cameroon      | 2018        | 2,911  | 2.28  |
| Chad          | 2014-2015   | 5,999  | 4.71  |
| Comoros       | 2012        | 1,320  | 1.03  |
| Congo         | 2013        | 2,609  | 2.05  |
| Cote d'Ivoire | 2011-12     | 2,174  | 1.71  |
| Congo DR      | 2013-14     | 4,806  | 3.77  |
| Ethiopia      | 2016        | 6,573  | 5.16  |
| Gabon         | 2012        | 1,960  | 1.54  |
| Gambia        | 2013        | 743    | 0.58  |
| Ghana         | 2014        | 1,896  | 1.49  |
| Guinea        | 2018        | 2,237  | 1.75  |
| Kenya         | 2014        | 6,066  | 4.76  |
| Lesotho       | 2014        | 1,012  | 0.79  |
| Liberia       | 2013        | 1,946  | 1.53  |
| Malawi        | 2015-16     | 4,027  | 3.16  |
| Mali          | 2018        | 5,653  | 4.43  |
| Namibia       | 2013        | 905    | 0.71  |
| Nigeria       | 2018        | 7,379  | 5.79  |
| Rwanda        | 2014-15     | 4,408  | 3.46  |
| Senegal       | 2010-11     | 1,944  | 1.52  |
| Sierra Leone  | 2019        | 2,689  | 2.11  |
| South Africa  | 2016        | 855    | 0.67  |
| Tanzania      | 2015-16     | 6,061  | 4.75  |
| Togo          | 2013-14     | 2,220  | 1.74  |
| Uganda        | 2016        | 2,891  | 2.27  |
| Zambia        | 2018        | 6,347  | 4.98  |
| Zimbabwe      | 2015        | 3,987  | 3.13  |
