# Supplementary material for: Risk factors associated with the coexistence of stunting, underweight, and wasting in children under 5 from 31 sub-Saharan African countries
Source: PubMed Central journal article supplement — BMJ Open. 2021 Dec 20;11(12):e052267. doi: 10.1136/bmjopen-2021-052267 (PMC8689177; doi:10.1136/bmjopen-2021-052267), 2021-12-20
Supplement: bmjopen-2021-052267supp002.pdf [file bmjopen-2021-052267supp002.pdf]

| Appendix 2: Multicollinearity diagnosis |      |          |           |           |
|-----------------------------------------|------|----------|-----------|-----------|
| Variable                                | VIF  | SQRT VIF | Tolerance | R-Squared |
| Age of child                            | 1.05 | 1.02     | 0.9547    | 0.0453    |
| Sex of child                            | 1.01 | 1        | 0.9948    | 0.0052    |
| Birth order                             | 1.36 | 1.17     | 0.7366    | 0.2634    |
| Perceived size at birth                 | 1.02 | 1.01     | 0.9798    | 0.0202    |
| Age at child birth                      | 1.22 | 1.1      | 0.8224    | 0.1776    |
| Educational attainment                  | 1.51 | 1.23     | 0.664     | 0.336     |
| Working status                          | 1.07 | 1.03     | 0.9357    | 0.0643    |
| Antenatal visits during pregnancy       | 1.25 | 1.12     | 0.7976    | 0.2024    |
| Postnatal check within 2 months         | 1.1  | 1.05     | 0.9098    | 0.0902    |
| Place of delivery                       | 1.31 | 1.15     | 0.7617    | 0.2383    |
| Wealth status                           | 1.8  | 1.34     | 0.5554    | 0.4446    |
| Age of household head                   | 1.05 | 1.02     | 0.9546    | 0.0454    |
| Sex of household head                   | 1.03 | 1.02     | 0.9702    | 0.0298    |
| Access to media (tv/radio/newspaper)    | 1.26 | 1.12     | 0.7913    | 0.2087    |
| Access to electricity                   | 1.71 | 1.31     | 0.5837    | 0.4163    |
| Type of toilet facility                 | 1.35 | 1.16     | 0.7404    | 0.2596    |
| Source of drinking water                | 1.09 | 1.04     | 0.9191    | 0.0809    |
| Type of cooking fuel                    | 1.31 | 1.14     | 0.7653    | 0.2347    |
| Urbanicity                              | 1.58 | 1.26     | 0.6319    | 0.3681    |
| Country                                 | 1.17 | 1.08     | 0.8579    | 0.1421    |
|                                         |      |          |           |           |
| Mean VIF                                | 1.26 |          |           |           |
