# Supplementary material for: Risk factors associated with the coexistence of stunting, underweight, and wasting in children under 5 from 31 sub-Saharan African countries
Source: PubMed Central journal article supplement — BMJ Open. 2021 Dec 20;11(12):e052267. doi: 10.1136/bmjopen-2021-052267 (PMC8689177; doi:10.1136/bmjopen-2021-052267), 2021-12-20
Supplement: bmjopen-2021-052267supp003.pdf [file bmjopen-2021-052267supp003.pdf]

## Appendix 3: Country-level risk of co-existence of stunting, wasting, and underweight

| Country (Ref: Angola) | Base outcome (Ref: Normal) |        |       |                                  |        |       |
|-----------------------|----------------------------|--------|-------|----------------------------------|--------|-------|
|                       | Single and two dimensions  |        |       | Co-existence of three-dimensions |        |       |
|                       | RRR                        | 95% CI |       | RRR                              | 95% CI |       |
| Benin                 | 0.651***                   | 0.598  | 0.708 | 0.625***                         | 0.489  | 0.798 |
| Burkina Faso          | 0.952                      | 0.866  | 1.046 | 1.946***                         | 1.526  | 2.481 |
| Burundi               | 1.580***                   | 1.424  | 1.753 | 2.049***                         | 1.545  | 2.718 |
| Cameroon              | 0.669***                   | 0.593  | 0.756 | 0.398***                         | 0.261  | 0.609 |
| Chad                  | 0.910                      | 0.823  | 1.007 | 1.505**                          | 1.184  | 1.913 |
| Comoros               | 0.883                      | 0.745  | 1.046 | 0.656                            | 0.378  | 1.138 |
| Congo                 | 0.674***                   | 0.580  | 0.783 | 0.472**                          | 0.279  | 0.800 |
| Cote d'Ivoire         | 0.734***                   | 0.638  | 0.844 | 0.739                            | 0.492  | 1.109 |
| DR Congo              | 1.229***                   | 1.100  | 1.373 | 1.351                            | 0.988  | 1.847 |
| Ethiopia              | 0.810***                   | 0.726  | 0.904 | 0.813                            | 0.604  | 1.095 |
| Gabon                 | 0.495***                   | 0.415  | 0.59  | 0.319**                          | 0.128  | 0.796 |
| Gambia                | 0.732**                    | 0.603  | 0.889 | 1.001                            | 0.618  | 1.620 |
| Ghana                 | 0.453***                   | 0.386  | 0.531 | 0.545**                          | 0.346  | 0.857 |
| Guinea                | 0.798***                   | 0.705  | 0.904 | 0.726                            | 0.509  | 1.036 |
| Kenya                 | 0.553***                   | 0.498  | 0.615 | 0.321***                         | 0.230  | 0.449 |
| Lesotho               | 0.777**                    | 0.654  | 0.924 | 0.369***                         | 0.177  | 0.772 |
| Liberia               | 0.658***                   | 0.565  | 0.768 | 0.776                            | 0.484  | 1.243 |
| Malawi                | 0.794***                   | 0.708  | 0.889 | 0.447***                         | 0.291  | 0.687 |
| Mali                  | 0.600***                   | 0.541  | 0.664 | 1.006                            | 0.769  | 1.316 |
| Namibia               | 0.680***                   | 0.568  | 0.815 | 0.849                            | 0.505  | 1.426 |
| Nigeria               | 0.953                      | 0.868  | 1.046 | 1.527**                          | 1.183  | 1.972 |
| Rwanda                | 1.059                      | 0.954  | 1.176 | 1.991***                         | 1.541  | 2.571 |
| Senegal               | 0.660***                   | 0.572  | 0.761 | 0.643*                           | 0.434  | 0.952 |
| Sierra Leone          | 0.641***                   | 0.567  | 0.725 | 0.656*                           | 0.447  | 0.963 |
| South Africa          | 0.788*                     | 0.634  | 0.979 | 0.108***                         | 0.033  | 0.352 |
| Tanzania              | 0.772***                   | 0.699  | 0.851 | 0.699**                          | 0.512  | 0.954 |
| Togo                  | 0.557***                   | 0.490  | 0.633 | 0.838                            | 0.590  | 1.190 |
| Uganda                | 0.627***                   | 0.556  | 0.708 | 0.421***                         | 0.278  | 0.637 |
| Zambia                | 0.904*                     | 0.818  | 0.998 | 0.519***                         | 0.366  | 0.736 |
| Zimbabwe              | 0.693***                   | 0.620  | 0.775 | 0.344***                         | 0.214  | 0.554 |
